# Supplementary material
Source: PubMed Central journal article supplement (PMC9038712)
Supplement: NIHMS1794804-supplement-Appendix_3_.pdf [file NIHMS1794804-supplement-Appendix_3_.pdf]

## **Appendix Supplementary Materials**

### **Supplemental Methods**

The following supplementary methodology is provided to support the study.

#### **The Piedmont and Valle d'Aosta Registry (PARALS)**

The Piedmont and Valle d'Aosta Registry for ALS (PARALS) has been in continuous operation since 1995. Details of the registry have been described elsewhere.<sup>1,2,3</sup> Briefly, the registry operates in Piemonte and Valle d'Aosta, two highly industrialized regions of Northwestern Italy. The study area's population was 4,393,609 in 2021, and the two regions encompass 11,066 square miles. The high level of the Italian health services means that patients with ALS are likely to be seen by a hospital neurologist at least once during their disease course. All twenty-six neurology departments of the two regions are involved in the study. In addition, there are two tertiary referral ALS centers, one located in Veruno, at the Salvatore Maugeri Center for Neurologic Rehabilitation, and the other in Turin, at the Department of Neuroscience, University of Turin.<sup>1</sup> One or more investigators act as study referent(s) in each department. All the rehabilitation and geriatrics departments in the region are regularly contacted and are asked to report all possible cases of ALS.

A patient is eligible for inclusion in the registry when they had resided in the study area at least two years before their diagnosis.<sup>1</sup> The diagnosis of ALS is based on the World Federation of Neurology diagnostic criteria<sup>4</sup>, but after 2000, patients were also classified according to the revised El Escorial Criteria.<sup>5</sup> Patients are included in the registry if they meet the diagnosis of definite, probable, or probable laboratory-supported ALS at any stage of the disease.<sup>2</sup> When the diagnosis of a case is unclear, it is discussed during regular investigator meetings.<sup>1</sup> Uncertain diagnoses are verified at each follow-up visit. Patients with progressive muscular atrophy (PMA) and primary lateral sclerosis (PLS) variants of ALS are excluded.

The Piedmont regional government recognizes the Piemonte ALS Register as a register of high health interest.<sup>2</sup> Accordingly, the PARALS has the right to access all the existing databases owned by the regional administration and to obtain clinical information about patients with ALS from public and private hospitals and general practitioners.<sup>2</sup> A search is performed every six months in the Piemonte Central Regional Archive to ensure complete case ascertainment.<sup>2</sup> Clinical records of cases identified through the archive with the International Classification of Diseases (ICD-9) code 335.2 (motor neuron disease) are obtained from the hospitals. The relevant clinical information for each case is then analyzed to determine if the patient met the eligibility criteria.<sup>1</sup> Living patients are contacted by phone and visited by one of the neurologists involved in the study. Similar research is performed through the Central Regional Archive of Lombardy, a region bordering Piemonte, to identify cases resident in Piemonte or Valle d'Aosta but receiving their care in Lombardy.<sup>1</sup> An annual search of the Italian Statistical Bureau is also performed for mortality data (ICD-9 code 335.2).<sup>2</sup> Patients' date of death is obtained from the municipality offices where they resided.<sup>2</sup>

The investigators used a standard questionnaire to collect patients' demographic information, clinical history, neurologic and laboratory findings, ALS functional rating scale, and details of treatments.<sup>1,2</sup> Diagnostic electromyographic (EMG) examination is performed according to standard procedures. A clinical follow-up is performed at regular intervals (at least every 3 to 6 months).

#### **Emilia Romagna Region Registry for ALS (ERRALS)**

The Emilia Romagna Region Registry for ALS (ERRALS) was established in 2009. Details of the registry are described elsewhere.<sup>6</sup> Briefly, the Emilia Romagna Region consists of nine provinces (with 330 municipalities) and covers an area of 13,987 square miles. The population was 4,395,606 in 2009.<sup>6</sup> The prospective registry collects incident ALS cases among residents in the region using the revised El Escorial diagnostic criteria.<sup>5</sup>

Physicians collect a detailed phenotypic profile for each ALS patient.<sup>6</sup> This information includes age at symptom onset, age at diagnosis, gender, residency, employment history, site of onset, affected body regions, upper and lower motor neuron signs, El Escorial-revised classification, clinical phenotype, the presence of dementia or extrapyramidal signs, family history, diagnostic and laboratory tests (e.g., EMG, MRI), drugs use (including Riluzole), forced vital capacity, ALSFRS-R score, the use of enteral nutrition, the use of non-invasive or invasive ventilatory support, and the date, place and cause of death.

Clinical follow-up is performed at the seventeen neurological departments of the region.<sup>6</sup> These visits are used to collect information on the ALS clinical course, gastrostomy, ventilatory support, and survival. One or more investigators act as study referents in each department. The coordinating center (ALS Centre in Modena) regularly supervises the data to ensure record accuracy. The completeness of case ascertainment is augmented by cases attending the regional hospitals having an ICD-9 discharge code of 335.20, and by death certificates. Moreover, data were matched with data included in the Italian National Registry for Rare Diseases.<sup>6</sup> The clinical records of cases found through these secondary sources are reviewed accordingly.

### **Ethical approval**

The PARALS study was approved by the ethics committees of Azienda Ospedaliera Universitaria City of Health and Science of Turin (number 004462, June 10, 2010). After that date, patients signed written informed consent. A waiver was obtained for patients included in the register before 2010. The Piedmont regional government also recognized PARALS as a 'Registry of High Sanitary Interest' (Regional Law, April 11, 2012, number 4). Accordingly, the PARALS can access databases owned by the regional administration to obtain clinical information about ALS patients from public and private hospitals, and general practitioners. The ERRALS study was approved by the Azienda Ospedaliera Universitaria of Modena (number 124/08, September 2, 2008). Patients enrolled in ERRALS signed written informed consent. All PARALS and ERRALS records were anonymized according to the Italian code for the protection of personal data, and data were treated following the UE 2016/679 General Data Protection Regulation (GDPR).

### **Supervised subtype prediction – model selection and hyperparameter tuning**

The performance of the ensemble learning model was assessed by internal and external validation. The best algorithm and parameters to be used in the model were determined, followed by an evaluation of the effects of the different algorithms, algorithm parameters, and features. In multiple iterations, the cohort data was split into training and validation datasets. Hyperparameters were tuned on the training cohort using three-fold cross-validation. Two cross-validations were used for the optimization, and the third cross-validation was used to validate the results. A grid of possible parameter combinations and a randomized grid search were used to tune the hyperparameters and maximize accuracy.

The features included in each iteration were updated using the variable importance obtained from the previous iteration as a probabilistic prior. The best-performing model and features are then passed to the feature evolution stage. For the final external validation, the model was trained using the complete discovery dataset and the optimal hyperparameter combination, and the resulting model was evaluated on the replication set.

### **References**

1. Piemonte and Valle d'Aosta Register for Amyotrophic Lateral Sclerosis (PARALS). Incidence of ALS in Italy: evidence for a uniform frequency in Western countries. *Neurology*. 2001; **56**: 239–44
2. Chiò A, Mora G, Moglia C, et al. Secular Trends of Amyotrophic Lateral Sclerosis: The Piemonte and Valle d'Aosta Register. *JAMA Neurol* 2017; **74**: 1097–104
3. Migliaretti G, Berchiolla P, Dalmaso P, Cavallo F, Chiò A. Amyotrophic lateral sclerosis in Piedmont (Italy): a Bayesian spatial analysis of the incident cases. *Amyotroph Lateral Scler Frontotemporal Degener* 2013; **14**: 58–65
4. Brooks BR. El Escorial World Federation of Neurology criteria for the diagnosis of amyotrophic lateral sclerosis. Subcommittee on Motor Neuron Diseases/Amyotrophic Lateral Sclerosis of the World Federation of Neurology Research Group on Neuromuscular Diseases and the El Escorial "Clinical limits of amyotrophic lateral sclerosis" workshop contributors. *J Neurol Sci* 1994; **124** Suppl: 96–107
5. Brooks BR, Miller RG, Swash M, Munsat TL. World Federation of Neurology Research Group on Motor Neuron Diseases. El Escorial revisited: revised criteria for the diagnosis of amyotrophic lateral sclerosis. *Amyotroph Lateral Scler Other Motor Neuron Disord* 2000; **1**: 293–9
6. Mandrioli J, Biguzzi S, Guidi C, et al. Epidemiology of amyotrophic lateral sclerosis in Emilia Romagna Region (Italy): A population-based study. *Amyotroph Lateral Scler Frontotemporal Degener* 2014; **15**: 262–8.

7. Chiò A, Calvo A, Moglia C, et al. Phenotypic heterogeneity of amyotrophic lateral sclerosis: a population-based study. *J Neurol Neurosurg Psychiatry* 2011; **82**: 740–6.

**Supplemental Figure 1. The architecture of the multilayer perceptron neural network used for the semi-supervised subtype identification of ALS.** The neural network consists of five hidden layers with 200, 100, 50, 25 and 3 neurons. The neural network acts as a dimension reduction technique, compressing the data into 3 dimensions. After training the network with ten-fold cross-validation, the activations of the last hidden layer are used as input for the UMAP algorithm.

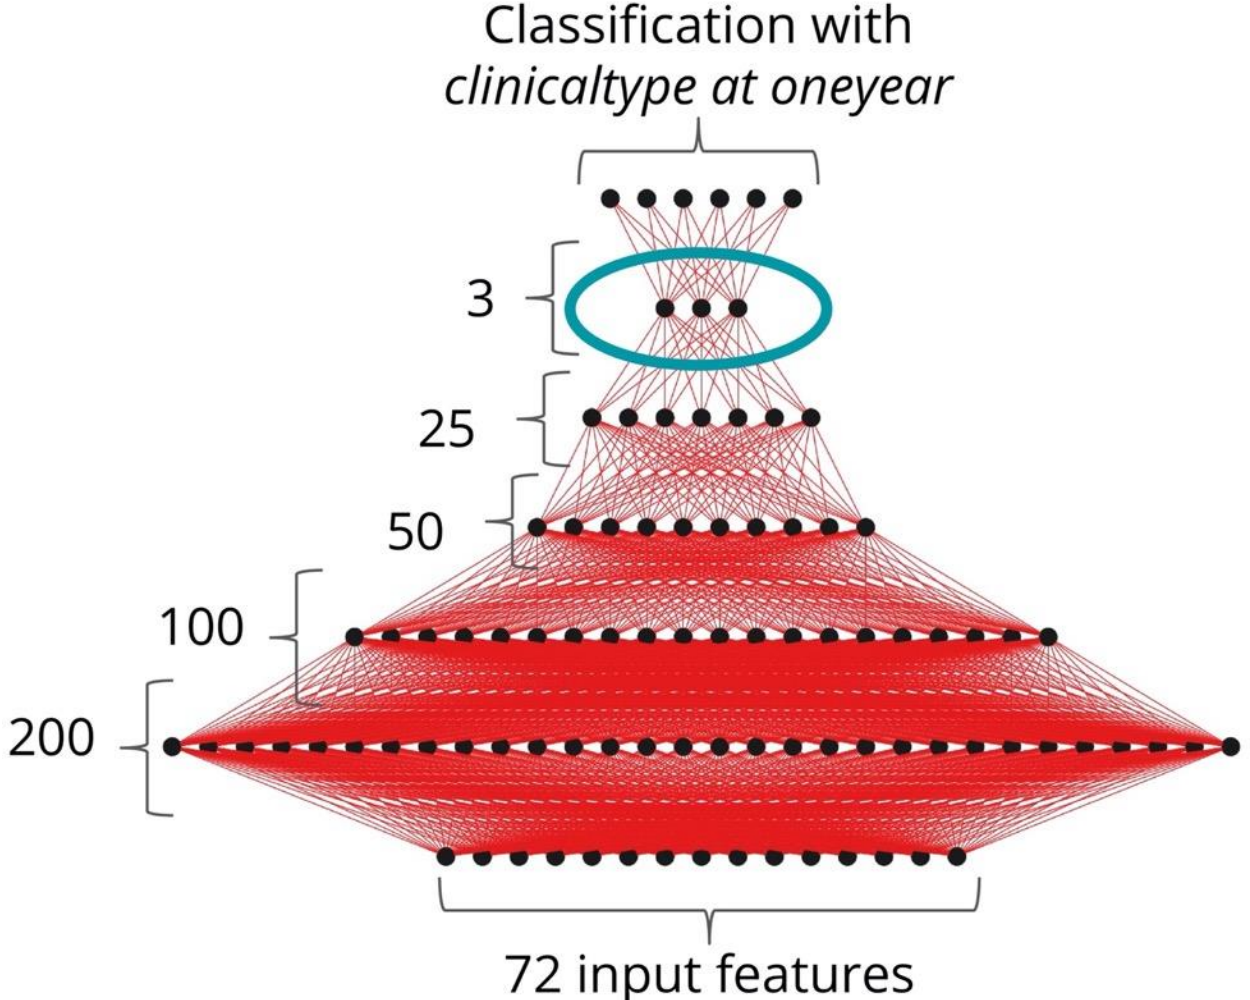

**Supplemental Figure 2. Supervised learning model used for ALS subtype identification.** The predictive model using all the clinical features was a stacked ensemble. The stacked ensemble parameters were: ensemble\_level=2, transforming the 21 original features to 72 transformed features. Each of the three stacked models was fit on three internal holdout splits and were linearly combined. Similarly, the predictive model with top eleven features was a stacked ensemble. The stacked ensemble parameters were: ensemble\_level=2, transforming the 11 original features to 34 transformed features. Each of the three stacked models was fit on three internal holdout splits and were linearly combined. The fitted features of the final model were the best features found during the feature engineering iterations.

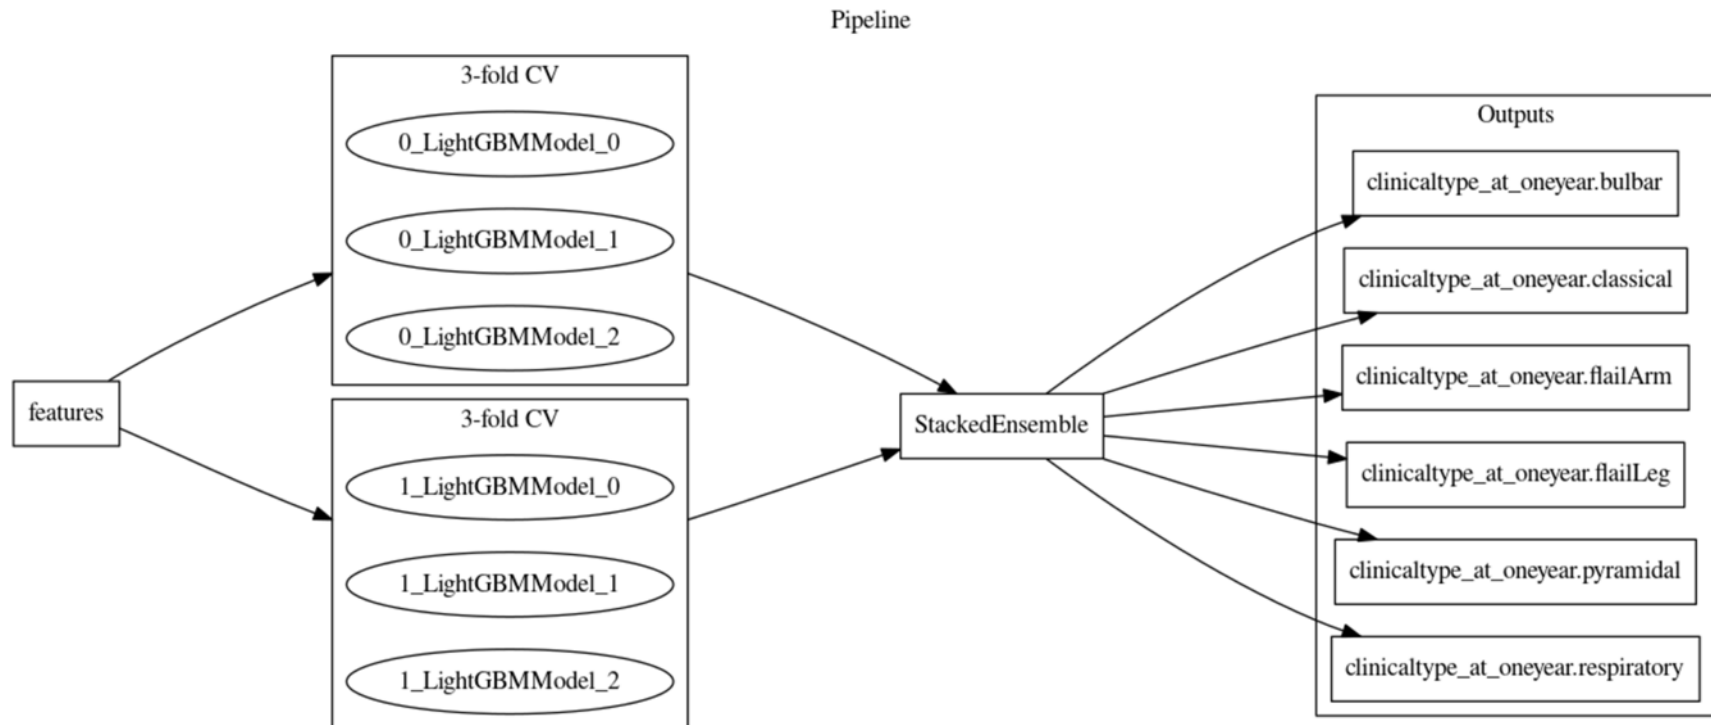

**Supplemental Figure 3. Feature Transformation used for the supervised learning model.** The effects of different types of algorithms, algorithm parameters, and features were evaluated during the Model and Feature Tuning Stage to determine the best algorithm and parameters to use. The Feature Transformation Stage uses a genetic algorithm to search the large feature engineering space. The graphs below show the Feature Transformations with the best performance from the stacked ensemble model. The left panel refers to model 0, and the right panel refers to model 1 in Figure S2.

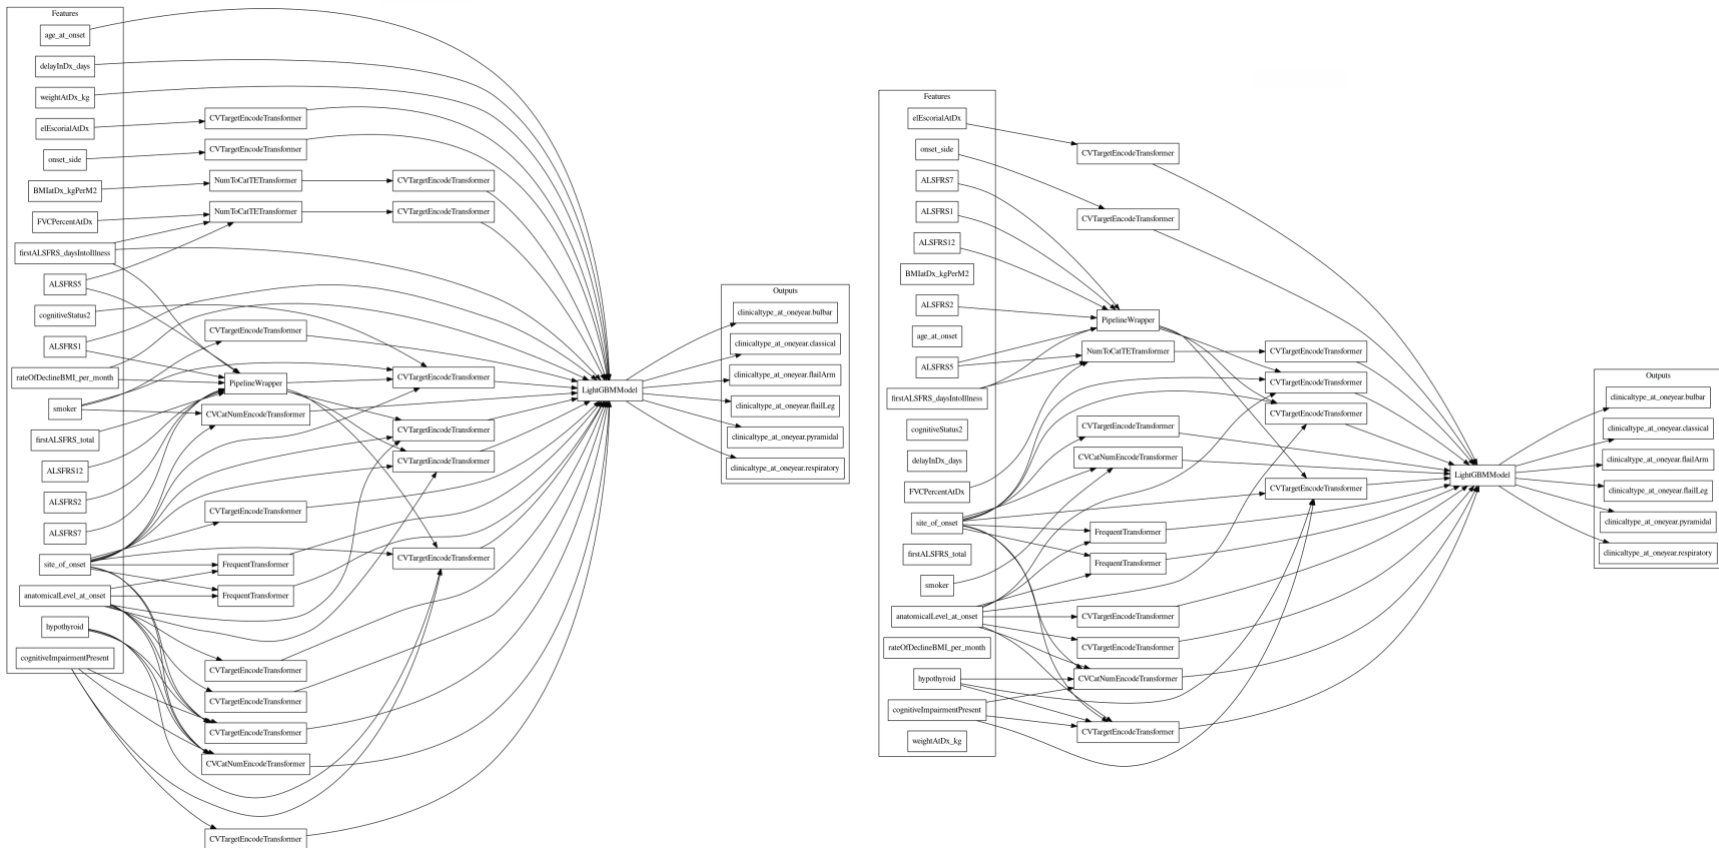

**Supplemental Figure 4. ALS subtypes identified by machine learning in the discovery and replication cohorts using UMAP alone.** The top row (A) shows the three different 3D projections of the discovery cohort defined by the semi-supervised machine learning algorithm consisting of a UMAP algorithm alone. The same 3D projections of the replication cohort are shown in the bottom row (B). Each patient (dot) was color-coded after machine learning cluster generation according to the Chiò classification system.

(A) Discovery cohort

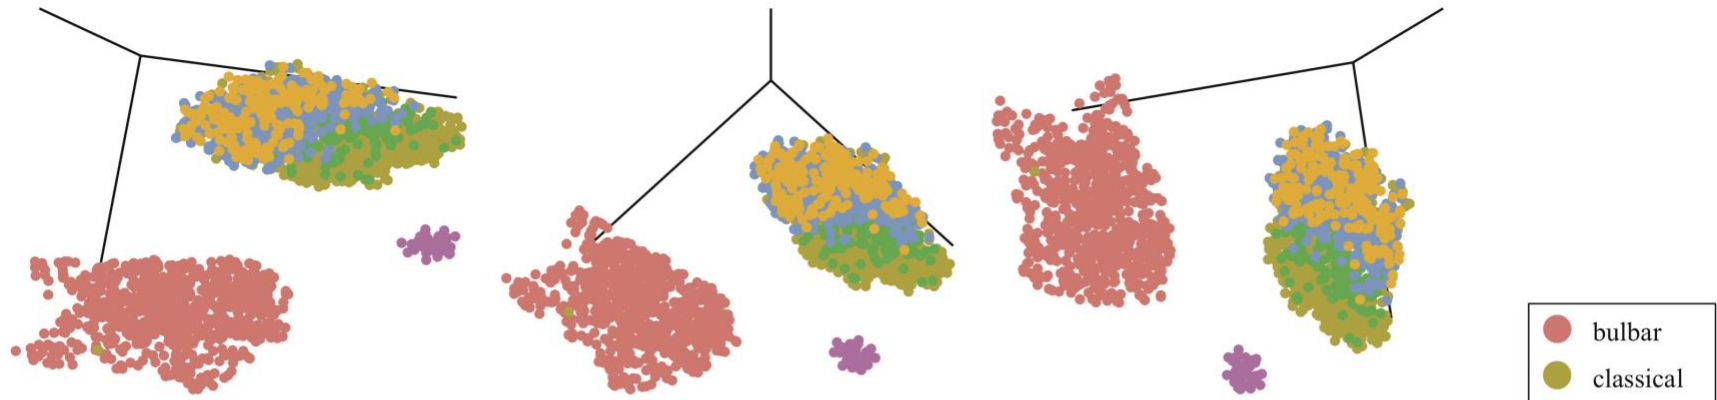

(B) Replication cohort

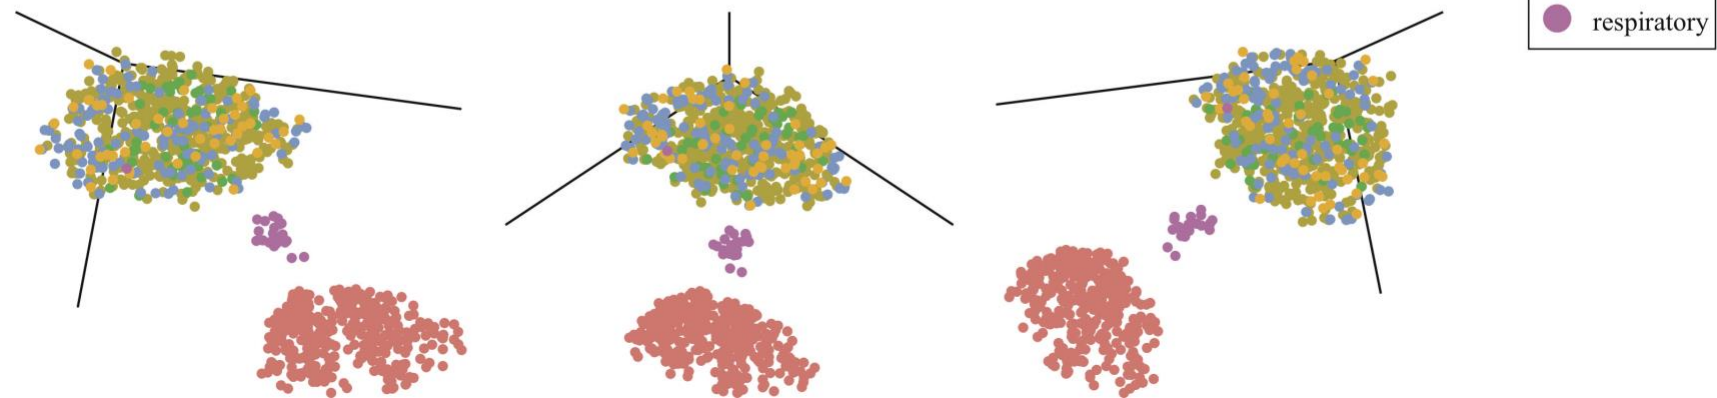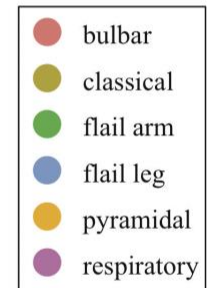

**Supplemental Figure 5. ALS clustering using dimension reduction approaches principal component analysis (PCA) and independent component analysis (ICA).** The top row shows a 3D projection of the discovery cohort (A) and the replication cohort (B) clustered using PCA. The bottom row shows the 3D projection of the discovery cohort (C) and the replication cohort (D) clustered using ICA. Each patient (dot) was color-coded after machine learning cluster generation according to the Chiò classification system.

(A) Discovery cohort - PCA

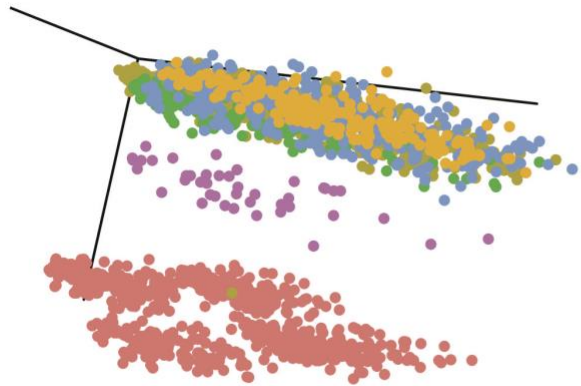

(B) Replication cohort - PCA

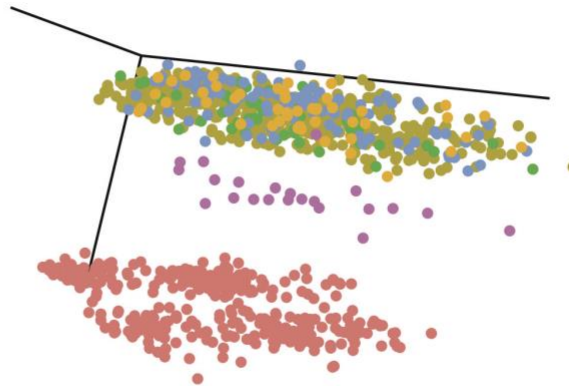

(C) Discovery cohort - ICA

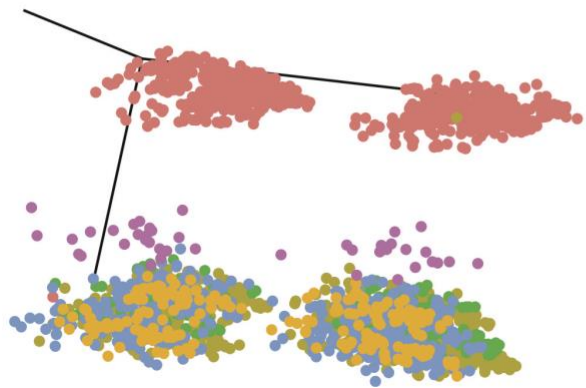

(D) Replication cohort - ICA

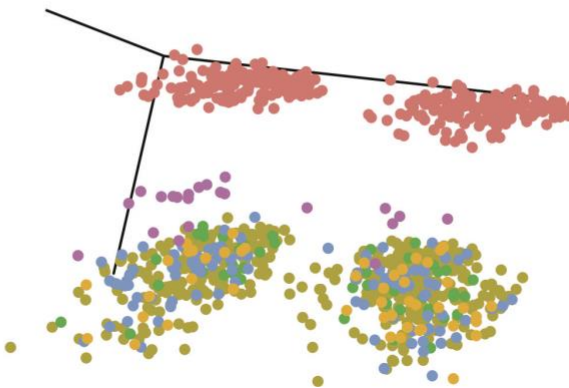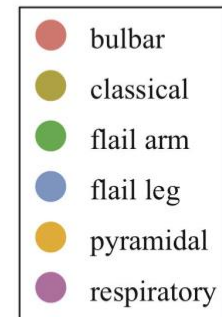



**Supplemental Figure 6. The performance of ALS disease subtype prediction models based on receiver operating characteristic (ROC) curves. (A) ROC curves for the model that includes all features. The left panel shows the validation dataset, and the right panel shows the test dataset. (B) ROC curves for the model based on the eleven most important features. The left panel shows the validation dataset, and the right panel shows the test dataset.**

(A)

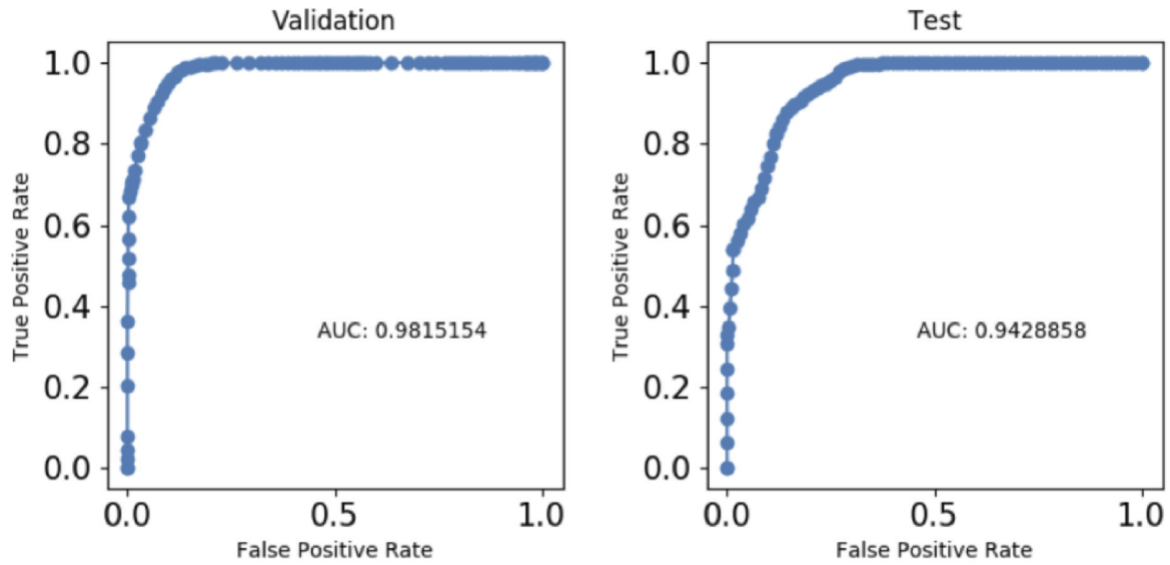

(B)

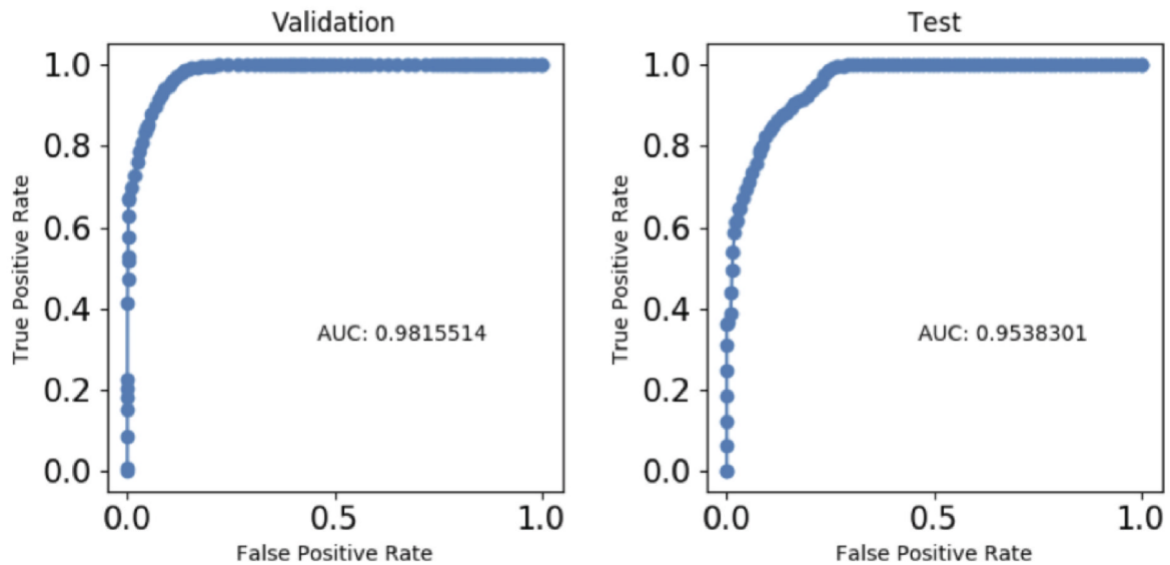

**Supplemental Figure 7. Precision-Recall Curve for the performance of ALS disease subtype prediction models.** The top row (A) shows the precision-recall curve for the prediction model based on all the clinical features. The bottom row (B) shows the precision-recall curve for the prediction model based on the eleven most important features.

(A) Predictive model constructed using all clinical features

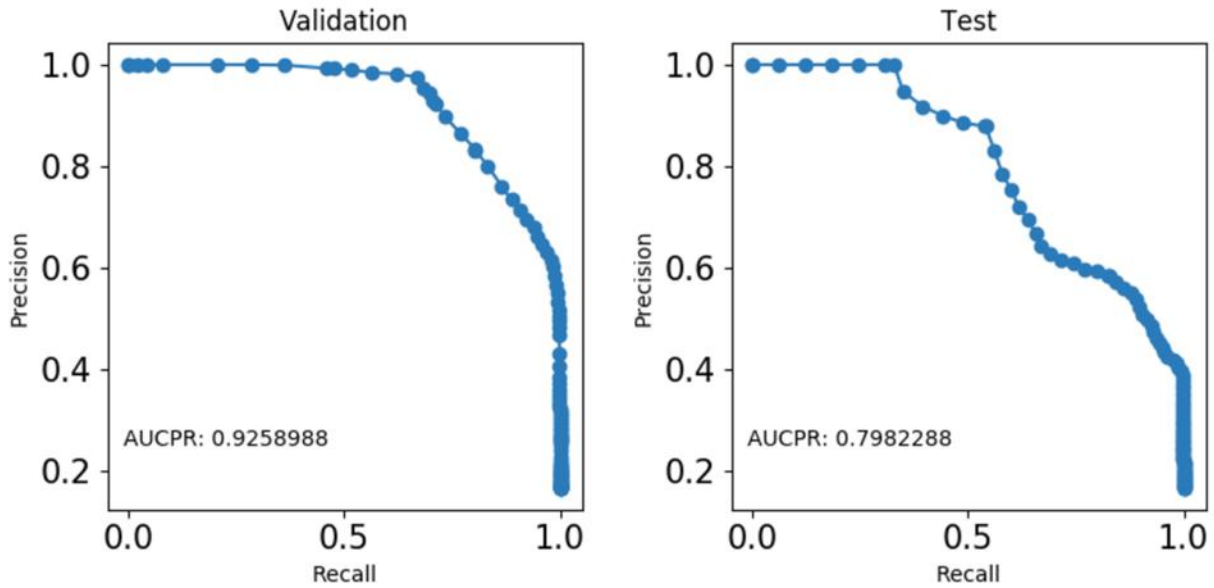

(B) Predictive model constructed using eleven clinical features

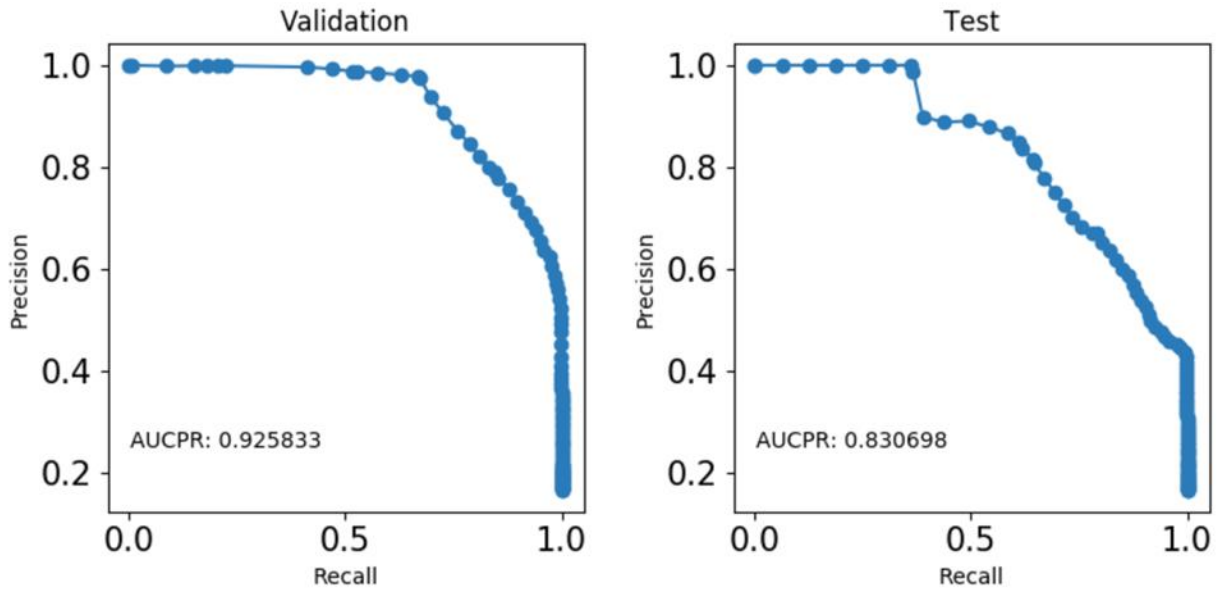

**Supplemental Table 1. Clinical parameters of the discovery and replication ALS cohorts used in each stage of analysis.**

|                                   | Prediction models                |            |
|-----------------------------------|----------------------------------|------------|
|                                   | Unsupervised and semi-supervised | Supervised |
| Age at diagnosis                  | Yes                              | No         |
| Age at symptom onset              | Yes                              | Yes        |
| ALSFRS1                           | Yes                              | Yes        |
| ALSFRS2                           | Yes                              | No         |
| ALSFRS3                           | Yes                              | No         |
| ALSFRS4                           | Yes                              | No         |
| ALSFRS5                           | Yes                              | No         |
| ALSFRS6                           | Yes                              | No         |
| ALSFRS7                           | Yes                              | No         |
| ALSFRS8                           | Yes                              | No         |
| ALSFRS9                           | Yes                              | No         |
| ALSFRS10                          | Yes                              | No         |
| ALSFRS11                          | Yes                              | No         |
| ALSFRS12                          | Yes                              | No         |
| First ALSFRS-R total              | Yes                              | No         |
| Anatomical level at onset         | Yes                              | Yes        |
| Ataxia                            | Yes                              | No         |
| BMI 2 years prior to illness      | Yes                              | No         |
| BMI at diagnosis                  | Yes                              | No         |
| C9orf72 status                    | No (data leakage)                | No         |
| Cancer                            | Yes                              | No         |
| Cancer type                       | No (irrelevance)                 | No         |
| Chorea                            | Yes                              | No         |
| Clinical type at one year         | No (data leakage)                | No         |
| Clinical type at onset            | No (missingness)                 | No         |
| Cognitive impairment present      | No (missingness)                 | No         |
| Cognitive status 1                | No (missingness)                 | No         |
| Cognitive status 2                | No (missingness)                 | No         |
| COPD                              | Yes                              | No         |
| Delay in diagnosis (days)         | Yes                              | No         |
| Diabetes                          | Yes                              | No         |
| Education                         | Yes                              | No         |
| EI Escorial category at diagnosis | Yes                              | Yes        |
| EI Escorial category at visit 2   | No (irrelevance)                 | No         |
| EI Escorial category at visit 3   | No (irrelevance)                 | No         |
| Family history of ALS             | Yes                              | No         |
| FVC percent at diagnosis          | Yes                              | Yes        |
| Height                            | Yes                              | No         |
| Hypertension                      | Yes                              | No         |
| Hyperthyroid                      | Yes                              | No         |
| Hypothyroid                       | Yes                              | No         |
| Initial diagnosis was PLS         | No (bias)                        | No         |
| Marital status                    | Yes                              | No         |
| Mutated gene                      | No (bias)                        | No         |
| Mutation amino acid change        | No (bias)                        | No         |
| Mutation present                  | No (bias)                        | No         |
| NIPPV                             | No (data leakage)                | No         |

|                                            |                   |     |
|--------------------------------------------|-------------------|-----|
| Onset side                                 | Yes               | Yes |
| Parkinsonism                               | Yes               | No  |
| PEG inserted                               | No (data leakage) | No  |
| Place of birth                             | No                | No  |
| Place of residence                         | No                | No  |
| Rate of decline ALSFRS-R (per month)       | Yes               | No  |
| Rate of decline BMI (per month)            | Yes               | Yes |
| Sex                                        | Yes               | No  |
| Site of symptom onset                      | Yes               | Yes |
| Smoker                                     | No (missingness)  | Yes |
| Survival (days)                            | No (data leakage) | No  |
| Time of first ALSFRS-R (days into illness) | Yes               | Yes |
| Time of NIPPV (days into illness)          | No (data leakage) | No  |
| Time of PEG (days into illness)            | No (data leakage) | No  |
| Time of tracheostomy (days into illness)   | No (data leakage) | No  |
| Tracheostomy                               | No (data leakage) | No  |
| Vital status                               | No (data leakage) | No  |
| Weight 2 years prior to illness            | Yes               | No  |
| Weight at diagnosis                        | Yes               | Yes |

---

ALSFRS-R, ALS Functional Rating Scale – Revised; ALSFRS1 refers to the first question on the scale. ALSFRS2, second question; BMI, body mass index measured in kg per m<sup>2</sup>; COPD, chronic obstructive pulmonary disease; PEG, percutaneous endoscopic gastrostomy; NIPPV, non-invasive positive pressure ventilation.

**Supplemental Table 2. Demographics and clinical features of the ALS registries analyzed in this study**

|                                      | PARALS<br>(n = 2,858) | ERRALS<br>(n=1,097) |
|--------------------------------------|-----------------------|---------------------|
| Age at diagnosis (years)             | 66.8 (11.1)           | 67.8 (11.3)         |
| Age at symptom onset (years)         | 65.9 (11.1)           | 66.6 (11.4)         |
| ALSFRS1                              | 3.3 (0.9)             | 3.1 (1.1)           |
| ALSFRS2                              | 3.7 (0.6)             | 3.5 (0.8)           |
| ALSFRS3                              | 3.4 (0.8)             | 3.2 (1)             |
| ALSFRS4                              | 3.3 (0.9)             | 3.2 (1)             |
| ALSFRS5                              | 3.2 (0.9)             | 2.6 (1.4)           |
| ALSFRS6                              | 3.2 (1)               | 2.7 (1.2)           |
| ALSFRS7                              | 3.4 (0.9)             | 3.2 (1.1)           |
| ALSFRS8                              | 3.1 (0.9)             | 2.9 (1.1)           |
| ALSFRS9                              | 2.7 (1.4)             | 2.3 (1.5)           |
| ALSFRS10                             | 3.7 (0.7)             | 3.6 (0.9)           |
| ALSFRS11                             | 3.8 (0.6)             | 3.7 (0.7)           |
| ALSFRS12                             | 3.9 (0.5)             | 3.8 (0.6)           |
| First ALSFRS-R total                 | 40.8 (6.4)            | 38.3 (7.9)          |
| Anatomical level at onset (n)        |                       |                     |
| bulbar                               | 1,009                 | 376                 |
| lower limb distal                    | 908                   | 270                 |
| lower limb proximal                  | 115                   | 77                  |
| respiratory                          | 48                    | 23                  |
| upper limb distal                    | 617                   | 196                 |
| upper limb proximal                  | 161                   | 65                  |
| Ataxia (n)                           | 1                     | 0                   |
| BMI 2 years prior to illness (kg/m2) | 26.0 (4.1)            | 25.8 (3.9)          |
| BMI at diagnosis (kg/m2)             | 24.5 (4.2)            | 24.4 (4)            |
| C9orf72 status (n)                   | 100                   | 22                  |
| Cancer (n)                           | 136                   | 122                 |
| Cancer type (n)                      |                       |                     |
| acoustic neuroma                     | 0                     | 2                   |
| adrenal                              | 0                     | 2                   |
| adrenal, breast                      | 0                     | 1                   |
| adrenal, ovary, thyroid              | 0                     | 1                   |
| bile duct                            | 1                     | 0                   |
| bile duct, melanoma                  | 0                     | 1                   |
| bladder                              | 12                    | 5                   |
| bladder, prostate                    | 0                     | 1                   |
| bladder, rectum                      | 0                     | 1                   |
| breast                               | 21                    | 22                  |
| breast, colon                        | 0                     | 1                   |
| breast, melanoma                     | 0                     | 1                   |
| breast, myeloma                      | 0                     | 1                   |
| breast, ovary                        | 0                     | 2                   |
| breast, uterus                       | 0                     | 2                   |
| chronic lymphoid leukemia            | 5                     | 0                   |
| chronic myeloid leukemia             | 2                     | 0                   |
| colon                                | 16                    | 9                   |
| colon, prostate                      | 0                     | 1                   |
| esophagus                            | 3                     | 0                   |
| gallbladder                          | 1                     | 0                   |
| larynx                               | 5                     | 0                   |
| larynx, stomach                      | 0                     | 1                   |
| liver                                | 1                     | 0                   |
| lung                                 | 23                    | 1                   |
| lung, thyroid                        | 0                     | 1                   |
| lymphoma                             | 4                     | 2                   |
| lymphoma, cutaneous                  | 1                     | 0                   |
| lymphoma, melanoma                   | 0                     | 1                   |
| lymphoma, non-Hodgkin's              | 1                     | 1                   |

|                                       |               |               |
|---------------------------------------|---------------|---------------|
| lymphoma, non-Hodgkin's, thyroid      | 0             | 1             |
| melanoma                              | 1             | 0             |
| meningioma                            | 0             | 2             |
| meningioma, prostate                  | 0             | 1             |
| mesothelioma                          | 1             | 0             |
| myeloma                               | 1             | 2             |
| myeloma, stomach                      | 0             | 1             |
| myelophthisis                         | 1             | 0             |
| nasopharyngeal                        | 0             | 4             |
| ovary                                 | 2             | 1             |
| ovary, uterus                         | 1             | 1             |
| pancreas                              | 1             | 3             |
| pituitary                             | 0             | 4             |
| pharynx                               | 1             | 0             |
| plasmacytoma                          | 1             | 0             |
| pleura                                | 2             | 0             |
| prostate                              | 13            | 21            |
| prostate, renal                       | 0             | 1             |
| rectum                                | 3             | 0             |
| renal                                 | 4             | 3             |
| schwannoma                            | 0             | 1             |
| skin cancer                           | 0             | 2             |
| stomach                               | 2             | 1             |
| thymoma                               | 1             | 1             |
| thyroid                               | 1             | 3             |
| uterus                                | 2             | 8             |
| vulva                                 | 1             | 0             |
| Chorea (n)                            | 1             | 2             |
| Clinical type at one year (n)         |               |               |
| bulbar                                | 1,009         | 376           |
| classical                             | 841           | 462           |
| flail arm                             | 188           | 52            |
| flail leg                             | 531           | 109           |
| pyramidal                             | 240           | 50            |
| respiratory                           | 48            | 24            |
| Clinical type at onset (n)            |               |               |
| bulbar                                | 893           | NA            |
| classical                             | 1,030         | NA            |
| LMN predominant                       | 501           | NA            |
| UMN predominant                       | 434           | NA            |
| Cognitive impairment present (n)      | 557           | 97            |
| Cognitive status 1 (n)                |               |               |
| ALSbi                                 | 33            | NA            |
| ALSci                                 | 176           | NA            |
| FTD                                   | 287           | 97            |
| non-executive impairment              | 22            | NA            |
| normal                                | 456           | 1,000         |
| Cognitive status 2 (n)                |               |               |
| ALSbi                                 | 61            | NA            |
| ALScbi                                | 38            | NA            |
| ALSci                                 | 129           | NA            |
| FTD                                   | 171           | NA            |
| non-executive impairment              | 16            | NA            |
| normal                                | 380           | NA            |
| COPD (n)                              | 202           | 97            |
| Delay in diagnosis (days)             | 347.8 (306.4) | 423.5 (429.6) |
| Diabetes (n)                          | 302           | 85            |
| Education (n)                         |               |               |
| less than 5 years                     | 0             | 47            |
| 5 years                               | 1,240         | 280           |
| 8 years                               | 705           | 260           |
| 11 years                              | 184           | 28            |
| 13 years                              | 359           | 223           |
| 18 years                              | 132           | 51            |
| El Escorial category at diagnosis (n) |               | 222           |
| possible                              | 359           | 345           |
| probable                              | 880           | 139           |
| probable-lab supported                | 169           | 336           |

|                                            |                  |                |
|--------------------------------------------|------------------|----------------|
| definite                                   | 1,335            |                |
| El Escorial category at visit 2 (n)        |                  |                |
| possible                                   | 71               | NA             |
| probable                                   | 260              | NA             |
| probable-lab supported                     | 39               | NA             |
| definite                                   | 372              | NA             |
| El Escorial category at visit 3 (n)        |                  |                |
| possible                                   | 8                | NA             |
| probable                                   | 260              | NA             |
| probable-lab supported                     | 39               | NA             |
| definite                                   | 372              | NA             |
| Family history of ALS (n)                  | 187              | 51             |
| FVC percent at diagnosis                   | 84.6 (25.7)      | 84.5 (24.9)    |
| Height (cm)                                | 164.5 (9.3)      | 167.9 (8.8)    |
| Hypertension (n)                           | 1,207            | 473            |
| Hyperthyroid (n)                           | 44               | 19             |
| Hypothyroid (n)                            | 204              | 56             |
| Initial diagnosis was PLS (n)              | 26               | 0 (0)          |
| Marital status (n)                         |                  |                |
| divorced                                   | 64               | 10             |
| married                                    | 2,034            | 246            |
| never married                              | 245              | 25             |
| separated                                  | 52               | 3              |
| widowed                                    | 366              | 49             |
| Mutated gene (n)                           |                  |                |
| <i>C9orf72</i>                             | 99               | 22             |
| <i>C9orf72 + TARDBP</i>                    | 1                | 0              |
| <i>FUS</i>                                 | 11               | 7              |
| <i>OPTN</i>                                | 1                | 0              |
| <i>SOD1</i>                                | 34               | 14             |
| <i>TARDBP</i>                              | 21               | 3              |
| <i>TUBA4A</i>                              | 2                | 0              |
| Mutation amino acid change                 | NA               | NA             |
| Mutation present (n)                       | 169              | 46             |
| NIPPV (n)                                  | 862              | 263            |
| Onset side (n)                             |                  |                |
| both                                       | 549              | 52             |
| left                                       | 438              | 407            |
| right                                      | 789              | 207            |
| Parkinsonism (n)                           | 52               | 30             |
| PEG inserted (n)                           | 890              | 233            |
| Place of birth                             | NA               | NA             |
| Place of residence                         | NA               | NA             |
| Rate of decline ALSFRS-R (per month)       | 0.9 (1.3)        | 1 (1.4)        |
| Rate of decline BMI (per month)            | 0.04 (0.1)       | 0 (0.1)        |
| Sex (female)                               | 1,318            | 485            |
| Site of symptom onset (n)                  |                  |                |
| bulbar                                     | 1,009            | 376            |
| respiratory                                | 48               | 23             |
| spinal                                     | 1,801            | 674            |
| Smoker (n)                                 |                  |                |
| current                                    | 406              | 92             |
| former                                     | 640              | 20             |
| never                                      | 957              | 61             |
| Survival (days)                            | 1,319.6 (1234.5) | 1271.7 (964.4) |
| Time of first ALSFRS-R (days into illness) | 402.1 (385.4)    | 484.1 (430.4)  |
| Time of NIPPV (days into illness)          | 868.9 (719.6)    | 733 (491.6)    |
| Time of PEG (days into illness)            | 833.6 (598.1)    | 738.3 (453.5)  |
| Time of tracheostomy (days into illness)   | 907.7 (617)      | 764.1 (480.2)  |
| Tracheostomy (n)                           | 363              | 299            |
| Vital status (deceased)                    | 2,549            | 663            |

|                                      |             |             |
|--------------------------------------|-------------|-------------|
| Weight 2 years prior to illness (kg) | 70.3 (12.4) | 73 (13.4)   |
| Weight at diagnosis (kg)             | 66.2 (12.8) | 69.1 (13.4) |

Numerical values are presented as means (standard deviations); All other columns are presented as counts; ALSFRS-R, ALS Functional Rating Scale – Revised; ALSFRS1 refers to the first question on the scale. ALSFRS2, second question; BMI, body mass index measured in kg per m<sup>2</sup>; COPD, chronic obstructive pulmonary disease; PEG, percutaneous endoscopic gastrostomy; NIPPV, non-invasive positive pressure ventilation.



**Supplementary Table 3. Performance of the models used to predict ALS clinical subtypes.** The tables show the metrics used to evaluate the performance of (A) the model based on all of the available clinical features and (B) the model based on only the most important clinical features.

(A) Predictive model based on all available clinical features

| Scorer   | Optimized | Better score is | Final ensemble scores on validation (internal) | Final ensemble standard deviation on validation (internal) | Final test scores (external) | Final test standard deviation |
|----------|-----------|-----------------|------------------------------------------------|------------------------------------------------------------|------------------------------|-------------------------------|
| ACCURACY |           | higher          | 0.8150798                                      | 0.01275987                                                 | 0.6439888                    | 0.01293791                    |
| AUC      |           | higher          | 0.9815154                                      | 0.002010137                                                | 0.9428858                    | 0.003738604                   |
| AUCPR    |           | higher          | 0.9258988                                      | 0.00742477                                                 | 0.7982288                    | 0.01136424                    |
| F05      |           | higher          | 0.8150798                                      | 0.01275987                                                 | 0.6439888                    | 0.01293791                    |
| F1       |           | higher          | 0.8150798                                      | 0.01275987                                                 | 0.6439888                    | 0.01293791                    |
| F2       |           | higher          | 0.8150798                                      | 0.01275987                                                 | 0.6439888                    | 0.01293791                    |
| GINI     |           | higher          | 0.9630309                                      | 0.004020274                                                | 0.8857717                    | 0.007477209                   |
| LOGLOSS  | *         | lower           | 0.4072223                                      | 0.02122787                                                 | 0.7757664                    | 0.03125351                    |
| MACROAUC |           | higher          | 0.9585233                                      | 0.003836152                                                | 0.8972699                    | 0.006460401                   |
| MCC      |           | higher          | 0.7780957                                      | 0.01531184                                                 | 0.5727866                    | 0.01552549                    |

(B) Predictive model based on most important clinical features

| Scorer   | Optimized | Better score is | Final ensemble scores on validation (internal) | Final ensemble standard deviation on validation (internal) | Final test scores (external) | Final test standard deviation |
|----------|-----------|-----------------|------------------------------------------------|------------------------------------------------------------|------------------------------|-------------------------------|
| ACCURACY |           | higher          | 0.8145004                                      | 0.009715746                                                | 0.7148183                    | 0.01396052                    |
| AUC      |           | higher          | 0.9815514                                      | 0.001332268                                                | 0.9538301                    | 0.003653627                   |
| AUCPR    |           | higher          | 0.925833                                       | 0.005046326                                                | 0.830698                     | 0.01184665                    |
| F05      |           | higher          | 0.8145004                                      | 0.009715746                                                | 0.7148183                    | 0.01396052                    |
| F1       |           | higher          | 0.8145004                                      | 0.009715746                                                | 0.7148183                    | 0.01396052                    |
| F2       |           | higher          | 0.8145004                                      | 0.009715746                                                | 0.7148183                    | 0.01396052                    |
| GINI     |           | higher          | 0.9631028                                      | 0.002664535                                                | 0.9076601                    | 0.007307254                   |
| LOGLOSS  | *         | lower           | 0.411088                                       | 0.0143602                                                  | 0.7687869                    | 0.03917954                    |
| MACROAUC |           | higher          | 0.9595809                                      | 0.002420295                                                | 0.9051199                    | 0.006400558                   |
| MCC      |           | higher          | 0.7774005                                      | 0.0116589                                                  | 0.6577819                    | 0.01675263                    |

**Supplementary Table 4. Validation Confusion Matrix of the models used to predict ALS clinical subtypes.** The tables show the validation confusion matrix of (A) the model based on all of the available clinical features and (B) the model based on only the most important clinical features.

**(A)** Predictive model based on all available clinical features

|                     | <b>Predicted:<br/>bulbar</b> | <b>Predicted:<br/>classical</b> | <b>Predicted:<br/>flail arm</b> | <b>Predicted:<br/>flail leg</b> | <b>Predicted:<br/>pyramidal</b> | <b>Predicted:<br/>respiratory</b> | <b>error</b> |
|---------------------|------------------------------|---------------------------------|---------------------------------|---------------------------------|---------------------------------|-----------------------------------|--------------|
| Actual: bulbar      | 1,007                        | 1                               | 0                               | 1                               | 0                               | 0                                 | 0%           |
| Actual: classical   | 1                            | 601                             | 1                               | 223                             | 15                              | 0                                 | 29%          |
| Actual: flail arm   | 0                            | 28                              | 160                             | 0                               | 0                               | 0                                 | 15%          |
| Actual: flail leg   | 0                            | 34                              | 0                               | 470                             | 27                              | 0                                 | 11%          |
| Actual: pyramidal   | 0                            | 11                              | 0                               | 189                             | 40                              | 0                                 | 83%          |
| Actual: respiratory | 0                            | 0                               | 0                               | 0                               | 0                               | 48                                | 0%           |

**(B)** Predictive model based on most important clinical features

|                     | <b>Predicted:<br/>bulbar</b> | <b>Predicted:<br/>classical</b> | <b>Predicted:<br/>flail arm</b> | <b>Predicted:<br/>flail leg</b> | <b>Predicted:<br/>pyramidal</b> | <b>Predicted:<br/>respiratory</b> | <b>error</b> |
|---------------------|------------------------------|---------------------------------|---------------------------------|---------------------------------|---------------------------------|-----------------------------------|--------------|
| Actual: bulbar      | 1,007                        | 1                               | 0                               | 1                               | 0                               | 0                                 | 0%           |
| Actual: classical   | 1                            | 657                             | 1                               | 156                             | 26                              | 0                                 | 22%          |
| Actual: flail arm   | 0                            | 28                              | 160                             | 0                               | 0                               | 0                                 | 15%          |
| Actual: flail leg   | 0                            | 91                              | 0                               | 397                             | 43                              | 0                                 | 25%          |
| Actual: pyramidal   | 0                            | 46                              | 0                               | 137                             | 57                              | 0                                 | 76%          |
| Actual: respiratory | 0                            | 0                               | 0                               | 0                               | 0                               | 48                                | 0%           |

**Supplementary Table 5. Test Confusion Matrix of the models used to predict ALS clinical subtypes.** The tables show the test confusion matrix of (A) the model based on all of the available clinical features and (B) the model based on only the most important clinical features.

**(A)** Predictive model based on all available clinical features

|                     | <b>Predicted:<br/>bulbar</b> | <b>Predicted:<br/>classical</b> | <b>Predicted:<br/>flail arm</b> | <b>Predicted:<br/>flail leg</b> | <b>Predicted:<br/>pyramidal</b> | <b>Predicted:<br/>respiratory</b> | <b>error</b> |
|---------------------|------------------------------|---------------------------------|---------------------------------|---------------------------------|---------------------------------|-----------------------------------|--------------|
| Actual: bulbar      | 376                          | 0                               | 0                               | 0                               | 0                               | 0                                 | 0%           |
| Actual: classical   | 0                            | 191                             | 122                             | 143                             | 6                               | 0                                 | 59%          |
| Actual: flail arm   | 0                            | 28                              | 23                              | 0                               | 1                               | 0                                 | 56%          |
| Actual: flail leg   | 0                            | 5                               | 26                              | 75                              | 3                               | 0                                 | 31%          |
| Actual: pyramidal   | 0                            | 3                               | 13                              | 31                              | 3                               | 0                                 | 94%          |
| Actual: respiratory | 0                            | 0                               | 1                               | 0                               | 0                               | 23                                | 4%           |

**(B)** Predictive model based on most important clinical features

|                     | <b>Predicted:<br/>bulbar</b> | <b>Predicted:<br/>classical</b> | <b>Predicted:<br/>flail arm</b> | <b>Predicted:<br/>flail leg</b> | <b>Predicted:<br/>pyramidal</b> | <b>Predicted:<br/>respiratory</b> | <b>error</b> |
|---------------------|------------------------------|---------------------------------|---------------------------------|---------------------------------|---------------------------------|-----------------------------------|--------------|
| Actual: bulbar      | 376                          | 0                               | 0                               | 0                               | 0                               | 0                                 | 0%           |
| Actual: classical   | 0                            | 284                             | 51                              | 119                             | 8                               | 0                                 | 39%          |
| Actual: flail arm   | 0                            | 39                              | 13                              | 0                               | 0                               | 0                                 | 75%          |
| Actual: flail leg   | 0                            | 34                              | 0                               | 69                              | 6                               | 0                                 | 37%          |
| Actual: pyramidal   | 0                            | 18                              | 0                               | 30                              | 2                               | 0                                 | 96%          |
| Actual: respiratory | 0                            | 0                               | 1                               | 0                               | 0                               | 23                                | 4%           |

**Supplementary Table 6. Detailed confusion matrix statistics on validation data of the models used to predict ALS clinical subtypes.** The tables show the detailed confusion matrix statistics of (A) the model based on all of the available clinical features and (B) the model based on only the most important clinical features.

(A) Predictive model based on all available clinical features

|                                        | <b>Bulbar</b> | <b>Classical</b> | <b>Flail arm</b> | <b>Flail leg</b> | <b>Pyramidal</b> | <b>Respiratory</b> |
|----------------------------------------|---------------|------------------|------------------|------------------|------------------|--------------------|
| Threshold (max F1 score)               | argmax        | argmax           | argmax           | argmax           | argmax           | argmax             |
| Population                             | 2,857         | 2,857            | 2,857            | 2,857            | 2,857            | 2,857              |
| P: Condition positive                  | 1,009         | 841              | 188              | 531              | 240              | 48                 |
| N: Condition negative                  | 1,848         | 2,016            | 2,669            | 2,326            | 2,617            | 2,809              |
| Test outcome positive                  | 1,008         | 675              | 161              | 883              | 82               | 48                 |
| Test outcome negative                  | 1,849         | 2,182            | 2,696            | 1,974            | 2,775            | 2,809              |
| TP: True Positive                      | 1,007         | 601              | 160              | 470              | 40               | 48                 |
| TN: True Negative                      | 1,847         | 1,942            | 2,668            | 1,913            | 2,575            | 2,809              |
| FP: False Positive                     | 1             | 74               | 1                | 413              | 42               | 0                  |
| FN: False Negative                     | 2             | 240              | 28               | 61               | 200              | 0                  |
| TPR: (Sensitivity, hit rate, recall)   | 0.998017839   | 0.714625446      | 0.85106383       | 0.885122411      | 0.166666667      | 1                  |
| TNR=SPC: (Specificity)                 | 0.999458874   | 0.963293651      | 0.999625328      | 0.82244196       | 0.983951089      | 1                  |
| PPV: Pos Pred Value (Precision)        | 0.999007937   | 0.89037037       | 0.99378882       | 0.532276331      | 0.487804878      | 1                  |
| NPV: Neg Pred Value                    | 0.998918334   | 0.890009166      | 0.989614243      | 0.969098278      | 0.927927928      | 1                  |
| FPR: False-out                         | 0.000541126   | 0.036706349      | 0.000374672      | 0.17755804       | 0.016048911      | 0                  |
| FDR: False Discovery Rate              | 0.000992063   | 0.10962963       | 0.00621118       | 0.467723669      | 0.512195122      | 0                  |
| FNR: Miss Rate                         | 0.001982161   | 0.285374554      | 0.14893617       | 0.114877589      | 0.833333333      | 0                  |
| ACC: Accuracy                          | 0.998949947   | 0.890094505      | 0.989849492      | 0.834091705      | 0.915295765      | 1                  |
| F1 score                               | 0.998512643   | 0.792875989      | 0.916905444      | 0.664780764      | 0.248447205      | 1                  |
| MCC: Matthew's correlation coefficient | 0.997701467   | 0.727347366      | 0.914642183      | 0.595612969      | 0.250233375      | 1                  |
| Informedness                           | 0.997476714   | 0.677919097      | 0.850689158      | 0.707564371      | 0.150617756      | 1                  |
| Markedness                             | 0.997926271   | 0.780379536      | 0.983403063      | 0.501374608      | 0.415732806      | 1                  |
| Prevalence                             | 0.353167658   | 0.294364718      | 0.06580329       | 0.185859293      | 0.0840042        | 0.01680084         |
| LR+: Positive likelihood ratio         | 1844.336967   | 19.46871485      | 2271.489362      | 4.984975126      | 10.38492063      | inf                |
| LR-: Negative likelihood ratio         | 0.001983234   | 0.296248765      | 0.148991993      | 0.139678658      | 0.846925566      | 0                  |
| DOR: Diagnostic odds ratio             | 929964.5      | 65.71745495      | 15245.71429      | 35.68888183      | 12.26190476      | inf                |
| FOR: False omission rate               | 0.001081666   | 0.109990834      | 0.010385757      | 0.030901722      | 0.072072072      | 0                  |

**(B)** Predictive model based on most important clinical features

|                                        | <b>Bulbar</b> | <b>Classical</b> | <b>Flail arm</b> | <b>Flail leg</b> | <b>Pyramidal</b> | <b>Respiratory</b> |
|----------------------------------------|---------------|------------------|------------------|------------------|------------------|--------------------|
| Threshold (max F1 score)               | argmax        | argmax           | argmax           | argmax           | argmax           | argmax             |
| Population                             | 2,857         | 2,857            | 2,857            | 2,857            | 2,857            | 2,857              |
| P: Condition positive                  | 1,009         | 841              | 188              | 531              | 240              | 48                 |
| N: Condition negative                  | 1,848         | 2,016            | 2,669            | 2,326            | 2,617            | 2,809              |
| Test outcome positive                  | 1,008         | 823              | 161              | 691              | 126              | 48                 |
| Test outcome negative                  | 1,849         | 2,034            | 2,696            | 2,166            | 2,731            | 2,809              |
| TP: True Positive                      | 1,007         | 657              | 160              | 397              | 57               | 48                 |
| TN: True Negative                      | 1,847         | 1,850            | 2,668            | 2,032            | 2,548            | 2,809              |
| FP: False Positive                     | 1             | 166              | 1                | 294              | 69               | 0                  |
| FN: False Negative                     | 2             | 184              | 28               | 134              | 183              | 0                  |
| TPR: (Sensitivity, hit rate, recall)   | 0.998017839   | 0.781212842      | 0.85106383       | 0.747645951      | 0.2375           | 1                  |
| TNR=SPC: (Specificity)                 | 0.999458874   | 0.91765873       | 0.999625328      | 0.873602752      | 0.973633932      | 1                  |
| PPV: Pos Pred Value (Precision)        | 0.999007937   | 0.798298906      | 0.99378882       | 0.574529667      | 0.452380952      | 1                  |
| NPV: Neg Pred Value                    | 0.998918334   | 0.909537856      | 0.989614243      | 0.938134811      | 0.932991578      | 1                  |
| FPR: False-out                         | 0.000541126   | 0.08234127       | 0.000374672      | 0.126397248      | 0.026366068      | 0                  |
| FDR: False Discovery Rate              | 0.000992063   | 0.201701094      | 0.00621118       | 0.425470333      | 0.547619048      | 0                  |
| FNR: Miss Rate                         | 0.001982161   | 0.218787158      | 0.14893617       | 0.252354049      | 0.7625           | 0                  |
| ACC: Accuracy                          | 0.998949947   | 0.877493875      | 0.989849492      | 0.85019251       | 0.91179559       | 1                  |
| F1 score                               | 0.998512643   | 0.789663462      | 0.916905444      | 0.649754501      | 0.31147541       | 1                  |
| MCC: Matthew's correlation coefficient | 0.997701467   | 0.703339883      | 0.914642183      | 0.56435108       | 0.28524589       | 1                  |
| Informedness                           | 0.997476714   | 0.698871572      | 0.850689158      | 0.621248703      | 0.211133932      | 1                  |
| Markedness                             | 0.997926271   | 0.707836763      | 0.983403063      | 0.512664478      | 0.385372531      | 1                  |
| Prevalence                             | 0.353167658   | 0.294364718      | 0.06580329       | 0.185859293      | 0.0840042        | 0.01680084         |
| LR+: Positive likelihood ratio         | 1844.336967   | 9.487500537      | 2271.489362      | 5.915049259      | 9.007789855      | inf                |
| LR-: Negative likelihood ratio         | 0.001983234   | 0.238418871      | 0.148991993      | 0.288865904      | 0.783148548      | 0                  |
| DOR: Diagnostic odds ratio             | 929964.5      | 39.79341278      | 15245.71429      | 20.47679968      | 11.50201948      | inf                |
| FOR: False omission rate               | 0.001081666   | 0.090462144      | 0.010385757      | 0.061865189      | 0.067008422      | 0                  |

**Supplementary Table 7. Detailed confusion matrix statistics on the test data of the models used to predict ALS clinical subtypes.** The tables show the detailed confusion matrix statistics of (A) the model based on all of the available clinical features and (B) the model based on only the most important clinical features.

(A) Predictive model based on all available clinical features

|                                       | <b>Bulbar</b> | <b>Classical</b> | <b>Flail arm</b> | <b>Flail leg</b> | <b>Pyramidal</b> | <b>Respiratory</b> |
|---------------------------------------|---------------|------------------|------------------|------------------|------------------|--------------------|
| Threshold (max F1 score)              | argmax        | argmax           | argmax           | argmax           | argmax           | argmax             |
| Population                            | 1,073         | 1,073            | 1,073            | 1,073            | 1,073            | 1,073              |
| P: Condition positive                 | 376           | 462              | 52               | 109              | 50               | 24                 |
| N: Condition negative                 | 697           | 611              | 1021             | 964              | 1,023            | 1,049              |
| Test outcome positive                 | 376           | 227              | 185              | 249              | 13               | 23                 |
| Test outcome negative                 | 697           | 846              | 888              | 824              | 1,060            | 1,050              |
| TP: True Positive                     | 376           | 191              | 23               | 75               | 3                | 23                 |
| TN: True Negative                     | 697           | 575              | 859              | 790              | 1,013            | 1,049              |
| FP: False Positive                    | 0             | 36               | 162              | 174              | 10               | 0                  |
| FN: False Negative                    | 0             | 271              | 29               | 34               | 47               | 1                  |
| TPR: (Sensitivity, hit rate, recall)  | 1             | 0.413419913      | 0.442307692      | 0.688073394      | 0.06             | 0.958333333        |
| TNR=SPC: (Specificity)                | 1             | 0.941080196      | 0.841332027      | 0.819502075      | 0.990224829      | 1                  |
| PPV: Pos Pred Value (Precision)       | 1             | 0.841409692      | 0.124324324      | 0.301204819      | 0.230769231      | 1                  |
| NPV: Neg Pred Value                   | 1             | 0.679669031      | 0.967342342      | 0.958737864      | 0.955660377      | 0.999047619        |
| FPR: False-out                        | 0             | 0.058919804      | 0.158667973      | 0.180497925      | 0.009775171      | 0                  |
| FDR: False Discovery Rate             | 0             | 0.158590308      | 0.875675676      | 0.698795181      | 0.769230769      | 0                  |
| FNR: Miss Rate                        | 0             | 0.586580087      | 0.557692308      | 0.311926606      | 0.94             | 0.041666667        |
| ACC: Accuracy                         | 1             | 0.7138863        | 0.821994408      | 0.806150979      | 0.946877912      | 0.999068034        |
| F1 score                              | 1             | 0.554426705      | 0.194092827      | 0.418994413      | 0.095238095      | 0.978723404        |
| MCC: Matthews correlation coefficient | 1             | 0.429793514      | 0.161246109      | 0.36323619       | 0.096764638      | 0.978478735        |
| Informedness                          | 1             | 0.35450011       | 0.28363972       | 0.507575469      | 0.050224829      | 0.958333333        |
| Markedness                            | 1             | 0.521078722      | 0.091666667      | 0.259942683      | 0.186429608      | 0.999047619        |
| Prevalence                            | 0.350419385   | 0.4305685        | 0.048462255      | 0.101584343      | 0.046598322      | 0.022367195        |
| LR+: Positive likelihood ratio        | inf           | 7.016654642      | 2.787630579      | 3.812084783      | 6.138            | inf                |
| LR-: Negative likelihood ratio        | 0             | 0.623305101      | 0.662868273      | 0.380629427      | 0.949279368      | 0.041666667        |
| DOR: Diagnostic odds ratio            | inf           | 11.25717507      | 4.205406556      | 10.01521298      | 6.465957447      | inf                |
| FOR: False omission rate              | 0             | 0.320330969      | 0.032657658      | 0.041262136      | 0.044339623      | 0.000952381        |

**(B)** Predictive model based on most important clinical features

|                                        | <b>Bulbar</b> | <b>Classical</b> | <b>Flail arm</b> | <b>Flail leg</b> | <b>Pyramidal</b> | <b>Respiratory</b> |
|----------------------------------------|---------------|------------------|------------------|------------------|------------------|--------------------|
| Threshold (max F1 score)               | argmax        | argmax           | argmax           | argmax           | argmax           | argmax             |
| Population                             | 1,073         | 1,073            | 1,073            | 1,073            | 1,073            | 1,073              |
| P: Condition positive                  | 376           | 462              | 52               | 109              | 50               | 24                 |
| N: Condition negative                  | 697           | 611              | 1,021            | 964              | 1,023            | 1,049              |
| Test outcome positive                  | 376           | 375              | 65               | 218              | 16               | 23                 |
| Test outcome negative                  | 697           | 698              | 1,008            | 855              | 1,057            | 1,050              |
| TP: True Positive                      | 376           | 284              | 13               | 69               | 2                | 23                 |
| TN: True Negative                      | 697           | 520              | 969              | 815              | 1,009            | 1,049              |
| FP: False Positive                     | 0             | 91               | 52               | 149              | 14               | 0                  |
| FN: False Negative                     | 0             | 178              | 39               | 40               | 48               | 1                  |
| TPR: (Sensitivity, hit rate, recall)   | 1             | 0-614718615      | 0-25             | 0-633027523      | 0-04             | 0-958333333        |
| TNR=SPC: (Specificity)                 | 1             | 0-85106383       | 0-94906954       | 0-845435685      | 0-986314761      | 1                  |
| PPV: Pos Pred Value (Precision)        | 1             | 0-757333333      | 0-2              | 0-316513761      | 0-125            | 1                  |
| NPV: Neg Pred Value                    | 1             | 0-744985673      | 0-961309524      | 0-953216374      | 0-954588458      | 0-999047619        |
| FPR: False-out                         | 0             | 0-14893617       | 0-05093046       | 0-154564315      | 0-013685239      | 0                  |
| FDR: False Discovery Rate              | 0             | 0-242666667      | 0-8              | 0-683486239      | 0-875            | 0                  |
| FNR: Miss Rate                         | 0             | 0-385281385      | 0-75             | 0-366972477      | 0-96             | 0-041666667        |
| ACC: Accuracy                          | 1             | 0-749301025      | 0-915191053      | 0-823858341      | 0-94221808       | 0-999068034        |
| F1 score                               | 1             | 0-678614098      | 0-222222222      | 0-422018349      | 0-060606061      | 0-978723404        |
| MCC: Matthew's correlation coefficient | 1             | 0-483705876      | 0-179197692      | 0-359243575      | 0-045764082      | 0-978478735        |
| Informedness                           | 1             | 0-465782445      | 0-19906954       | 0-478463208      | 0-026314761      | 0-958333333        |
| Markedness                             | 1             | 0-502319007      | 0-161309524      | 0-269730136      | 0-079588458      | 0-999047619        |
| Prevalence                             | 0-350419385   | 0-4305685        | 0-048462255      | 0-101584343      | 0-046598322      | 0-022367195        |
| LR+: Positive likelihood ratio         | inf           | 4-127396413      | 4-908653846      | 4-095560618      | 2-922857143      | inf                |
| LR-: Negative likelihood ratio         | 0             | 0-452705628      | 0-790247678      | 0-434063151      | 0-973320119      | 0-041666667        |
| DOR: Diagnostic odds ratio             | inf           | 9-11717496       | 6-211538462      | 9-435402685      | 3-00297619       | inf                |
| FOR: False omission rate               | 0             | 0-255014327      | 0-038690476      | 0-046783626      | 0-045411542      | 0-000952381        |

## CONSORTIA

The members of the PARALS Consortium are Adriano Chiò<sup>1,2</sup>, Andrea Calvo<sup>1,2</sup>, Cristina Moglia<sup>1,2</sup>, Antonio Canosa<sup>1,2</sup>, Umberto Manera<sup>1</sup>, Rosario Vasta<sup>1</sup>, Francesca Palumbo<sup>1</sup>, Alessandro Bombaci<sup>1</sup>, Maurizio Grassano<sup>1</sup>, Maura Brunetti<sup>1</sup>, Federico Casale<sup>1</sup>, Giuseppe Fuda<sup>1</sup>, Paolina Salamone<sup>1</sup>, Barbara Iazzolino<sup>1</sup>, Laura Peotta<sup>1</sup>, Paolo Cugno<sup>1</sup>, Giovanni De Marco<sup>3</sup>, Maria Claudia Torrieri<sup>1</sup>, Salvatore Gallone<sup>3</sup>, Marco Barberis<sup>4</sup>, Luca Sbaiz<sup>4</sup>, Salvatore Gentile<sup>5</sup>, Alessandro Mauro<sup>1,6</sup>, Letizia Mazzini<sup>7,8</sup>, Fabiola De Marchi<sup>7,8</sup>, Lucia Corrado<sup>9,8</sup>, Sandra D'Alfonso<sup>9,8</sup>, Antonio Bertolotto<sup>10</sup>, Daniele Imperiale<sup>11</sup>, Marco De Mattei<sup>12</sup>, Salvatore Amarù<sup>13</sup>, Cristoforo Comi<sup>14,15</sup>, Carmelo Labate<sup>16</sup>, Fabio Poglio<sup>16</sup>, Luigi Ruiz<sup>17</sup>, Lucia Testa<sup>18</sup>, Eugenia Rota<sup>19</sup>, Paolo Ghiglione<sup>20</sup>, Nicola Launaro<sup>21</sup>, and Alessia Di Sapio<sup>22</sup>

1. “Rita Levi Montalcini” Department of Neuroscience, ALS Centre, University of Torino, Turin, Italy
2. SC Neurologia 1, Azienda Ospedaliero Universitaria Città della Salute e della Scienza, Torino, Italy
3. Neurologia 1, Azienda Ospedaliero Universitaria Città della Salute e della Scienza, Torino, Italy
4. Department of Medical Genetics, Azienda Ospedaliero Universitaria Città della Salute e della Scienza, Torino, Italy
5. Neurologia 3, Azienda Ospedaliero Universitaria Città della Salute e della Scienza di Torino, Torino, Italy
6. Istituto Auxologico Italiano, IRCCS, Piacavallo, Italy
7. Department of Neurology, ‘Amedeo Avogadro’ University of Piemonte Orientale, Novara, Italy
8. Azienda Ospedaliero Universitaria ‘Maggiore della Carità’, Novara, Italy
9. Department of Haed Sciences, ‘Amedeo Avogadro’ University of Piemonte Orientale, Novara, Italy
10. Department of Neurology and Multiple Sclerosis Center, Azienda Ospedaliero Universitaria San Luigi, Orbassano, Italy
11. Department of Neurology, Ospedale Maria Vittoria, ASL Città di Torino, Torino, Italy
12. Department of Neurology, Ospedale ‘Santa Croce’ di Moncalieri, ASL Torino 5, Moncalieri, Italy
13. Department of Neurology, Presidio Ospedaliero di Rivoli, ASL Torino3, Rivoli, Italy
14. Department of Neurology, Ospedale ‘Sant’ Andrea’ di Vercelli, ASL Vercelli, Vercelli, Italy
15. Department of Clinical and Experimental Medicine, ‘Amedeo Avogadro’ University of Piemonte Orientale, Novara, Italy
16. Department of Neurology, Ospedale Civile ‘Edoardo Agnelli’ di Pinerolo, ALS Torino 2, Pinerolo, Italy
17. Department of Neurology, Azienda Ospedaliera ‘Santi Antonio e Biagio’ di Alessandria, Alessandria, Italy
18. Department of Neurology, Ospedale ‘Santo Spirito’ di Casale Monferrato, ASL Alessandria, Casale Monferrato, Italy
19. Department of Neurology, Ospedale ‘San Giacomo’ di Novi Ligure, ASL Alessandria, Novi Ligure, Italy
20. Department of Neurology, Ospedale ‘Maggiore Santissima Annuziata’ di Savigliano, ASL Cuneo 1, Savigliano, Italy
21. Department of Anesthesiology, Ospedale ‘Maggiore Santissima Annuziata’ di Savigliano, ASL Cuneo 1, Savigliano, Italy
22. Department of Neurology, Ospedale ‘Regina Montis Regalis’ di Mondovì, ASL Cuneo 1, Italy

The members of the ERRALS Consortium are: Jessica Mandrioli<sup>1,2</sup>, Nicola Fini<sup>1</sup>, Iliaria Martinelli<sup>1,2</sup>, Elisabetta Zucchi<sup>1,2</sup>, Giulia Gianferrari<sup>2</sup>, Cecilia Simonini<sup>1</sup>, Stefano Meletti<sup>1,2</sup>, Rocco Liguori<sup>3</sup>, Veria Vacchiano<sup>3</sup>, Fabrizio Salvi<sup>4</sup>, Iliaria Bartolomei<sup>4</sup>, Roberto Michelucci<sup>4</sup>, Pietro Cortelli<sup>3,5</sup>, Rita Rinaldi<sup>5</sup>, Anna Maria Borghi<sup>6</sup>, Andrea Zini<sup>6</sup>, Elisabetta Sette<sup>7</sup>, Valeria Tugnoli<sup>7</sup>, Maura Pugliatti<sup>8</sup>, Elena Canali<sup>9</sup>, Luca Codeluppi<sup>9</sup>, Franco Valzania<sup>9</sup>, Lucia Zinno<sup>10</sup>, Giovanni Pavesi<sup>10</sup>, Doriana Medici<sup>11</sup>, Giovanna Pilurzi<sup>11</sup>, Emilio Terlizzi<sup>12</sup>, Donata Guidetti<sup>12</sup>, Silvia De Pasqua<sup>13</sup>, Mario Santangelo<sup>13</sup>, Patrizia De Massis<sup>14</sup>, Martina Bracaglia<sup>14</sup>, Mario Casmiro<sup>15</sup>, Pietro Querzani<sup>15</sup>, Simonetta Morresi<sup>16</sup>, Marco Longoni<sup>16-17</sup>, Alberto Patuelli<sup>17</sup>, Susanna Malagù<sup>17</sup>, Marco Currò Dossi<sup>18</sup>, Simone Vidale<sup>18</sup>, and Salvatore Ferro<sup>19</sup>

1. Department of Neurosciences, Azienda Ospedaliero Universitaria di Modena, Modena, Italy
2. Department of Biomedical, Metabolic and Neurosciences, University of Modena and Reggio Emilia, Modena, Italy
3. Dipartimento di Scienze Biomediche e Neuromotorie, University of Bologna, and IRCCS Istituto delle Scienze Neurologiche di Bologna, Bellaria Hospital, Bologna, Italy



4. IRCCS Istituto delle Scienze Neurologiche di Bologna, Bellaria Hospital, Bologna, Italy
5. IRCCS Istituto delle Scienze Neurologiche di Bologna, UOC Interaziendale Clinica Neurologica Metropolitana (NeuroMet), Bologna, Italy
6. IRCCS Istituto delle Scienze Neurologiche di Bologna, Department of Neurology and Stroke Center, Maggiore Hospital, Bologna, Italy
7. Department of Neurosciences and Rehabilitation, St Anna Hospital, Ferrara, Italy
8. Department of Neuroscience, University of Ferrara, Ferrara, Italy
9. Department of Neurology, IRCCS Arcispedale Santa Maria Nuova, Reggio Emilia
10. Department of Neuroscience, University of Parma, Parma, Italy
11. Department of Neurology, Fidenza Hospital, Parma, Italy
12. Department of Neurology, G. Da Saliceto Hospital, Piacenza, Italy
13. Department of Neurology, Carpi Hospital, Modena, Italy
14. Department of Neurology, Imola Hospital, Bologna, Italy
15. Department of Neurology, Faenza and Ravenna Hospital, Ravenna, Italy
16. Department of Neurology, Bufalini Hospital, Cesena, Italy
17. Department of Neurology, Forlì Hospital, Forlì, Italy
18. Department of Neurology, Infermi Hospital, Rimini, Italy
19. Department of Hospital Services, Emilia Romagna Regional Health Authority, Bologna, Italy

## Table 1 The MI-CLAIM checklist

From: [Minimum information about clinical artificial intelligence modeling: the MI-CLAIM checklist](#)

Fagri et al, [tdigitalhealth-D-21-00297](#)

| Before paper submission                                                                                 |                                                                                      |                        |
|---------------------------------------------------------------------------------------------------------|--------------------------------------------------------------------------------------|------------------------|
| Study design (Part 1)                                                                                   | Completed: page number                                                               | Notes if not completed |
| The clinical problem in which the model will be employed is clearly detailed in the paper.              | <input checked="" type="checkbox"/> 8-9                                              |                        |
| The research question is clearly stated.                                                                | <input checked="" type="checkbox"/> 8-9                                              |                        |
| The characteristics of the cohorts (training and test sets) are detailed in the text.                   | <input checked="" type="checkbox"/> 9-10                                             |                        |
| The cohorts (training and test sets) are shown to be representative of real-world clinical settings.    | <input checked="" type="checkbox"/> 9-10                                             |                        |
| The state-of-the-art solution used as a baseline for comparison has been identified and detailed.       | <input checked="" type="checkbox"/> 10                                               |                        |
| Data and optimization (Parts 2, 3)                                                                      | Completed: page number                                                               | Notes if not completed |
| The origin of the data is described and the original format is detailed in the paper.                   | <input type="checkbox"/> 9-10                                                        |                        |
| Transformations of the data before it is applied to the proposed model are described.                   | <input checked="" type="checkbox"/> 10-11                                            |                        |
| The independence between training and test sets has been proven in the paper.                           | <input checked="" type="checkbox"/> 10                                               |                        |
| Details on the models that were evaluated and the code developed to select the best model are provided. | <input checked="" type="checkbox"/> 11-14                                            |                        |
| Is the input data type structured or unstructured?                                                      | <input checked="" type="checkbox"/> Structured <input type="checkbox"/> Unstructured |                        |
| Model performance (Part 4)                                                                              | Completed: page number                                                               | Notes if not completed |
| The primary metric selected to evaluate algorithm performance                                           |                                                                                      |                        |

|                                                                                                                                                                       |                                     |               |                  |
|-----------------------------------------------------------------------------------------------------------------------------------------------------------------------|-------------------------------------|---------------|------------------|
| The primary metric selected to evaluate algorithm performance (e.g., AUC, F-score, etc.), including the justification for selection, has been clearly stated.         | <input checked="" type="checkbox"/> | 11-13         |                  |
| The primary metric selected to evaluate the clinical utility of the model (e.g., PPV, NNT, etc.), including the justification for selection, has been clearly stated. | <input checked="" type="checkbox"/> | 13            |                  |
| The performance comparison between baseline and proposed model is presented with the appropriate statistical significance.                                            | <input checked="" type="checkbox"/> | 12            |                  |
| <b>Model examination (Part 5)</b>                                                                                                                                     | <b>Completed:</b>                   | <b>page</b>   | <b>Notes if</b>  |
|                                                                                                                                                                       | <b>number</b>                       | <b>number</b> | <b>not</b>       |
|                                                                                                                                                                       |                                     |               | <b>completed</b> |
| Examination technique 1 <sup>a</sup>                                                                                                                                  | <input checked="" type="checkbox"/> | 15            |                  |
| Examination technique 2 <sup>a</sup>                                                                                                                                  | <input checked="" type="checkbox"/> | 16            |                  |
| A discussion of the relevance of the examination results with respect to model/algorithm performance is presented.                                                    | <input checked="" type="checkbox"/> | 17-21         |                  |
| A discussion of the feasibility and significance of model interpretability at the case level if examination methods are uninterpretable is presented.                 | <input checked="" type="checkbox"/> | 17-21         |                  |
| A discussion of the reliability and robustness of the model as the underlying data distribution shifts is included.                                                   | <input checked="" type="checkbox"/> | 17-21         |                  |
| <b>Reproducibility (Part 6): choose appropriate tier of transparency</b>                                                                                              |                                     |               | <b>Notes</b>     |
| Tier 1: complete sharing of the code                                                                                                                                  | <input checked="" type="checkbox"/> |               |                  |
| Tier 2: allow a third party to evaluate the code for accuracy/fairness; share the results of this evaluation                                                          | <input type="checkbox"/>            |               |                  |
| Tier 3: release of a virtual machine (binary) for running the code on new data without sharing its details                                                            | <input type="checkbox"/>            |               |                  |
| Tier 4: no sharing                                                                                                                                                    | <input type="checkbox"/>            |               |                  |

1. PPV, positive predictive value; NNT, numbers needed to treat.
2. <sup>a</sup>Common examination approaches based on study type: for studies involving exclusively structured data, coefficients and sensitivity analysis are often appropriate; for studies involving unstructured data in the domains of image analysis or natural language processing, saliency maps (or equivalents) and sensitivity analyses are often appropriate.

[Back to article page >](#)

Nature Medicine ISSN 1546-170X (online)

© 2021 Springer Nature Limited

## STROBE (Strengthening The Reporting of OBServational Studies in Epidemiology) Checklist

A checklist of items that should be included in reports of observational studies. You must report the page number in your manuscript where you consider each of the items listed in this checklist. If you have not included this information, either revise your manuscript accordingly before submitting or note N/A.

**Note:** An Explanation and Elaboration article discusses each checklist item and gives methodological background and published examples of transparent reporting. The STROBE checklist is best used in conjunction with this article (freely available on the Web sites of PLoS Medicine at <http://www.plosmedicine.org/>, Annals of Internal Medicine at <http://www.annals.org/>, and Epidemiology at <http://www.epidem.com/>). Information on the STROBE Initiative is available at [www.strobe-statement.org](http://www.strobe-statement.org).

| Section and Item     | Item No. | Recommendation                                                                                                                                                                             | Reported on Page No. |
|----------------------|----------|--------------------------------------------------------------------------------------------------------------------------------------------------------------------------------------------|----------------------|
| Title and Abstract   | 1        | (a) Indicate the study's design with a commonly used term in the title or the abstract                                                                                                     | 1                    |
|                      |          | (b) Provide in the abstract an informative and balanced summary of what was done and what was found                                                                                        | 3                    |
| <b>Introduction</b>  |          |                                                                                                                                                                                            |                      |
| Background/Rationale | 2        | Explain the scientific background and rationale for the investigation being reported                                                                                                       | 8-9                  |
| Objectives           | 3        | State specific objectives, including any prespecified hypotheses                                                                                                                           | 9,11                 |
| <b>Text</b>          |          |                                                                                                                                                                                            |                      |
| <b>Methods</b>       |          |                                                                                                                                                                                            |                      |
| Study Design         | 4        | Present key elements of study design early in the paper                                                                                                                                    | 9-13                 |
| Setting              | 5        | Describe the setting, locations, and relevant dates, including periods of recruitment, exposure, follow-up, and data collection                                                            | 9-10                 |
| Participants         | 6        | (a) <i>Cohort study</i> —Give the eligibility criteria, and the sources and methods of selection of participants. Describe methods of follow-up                                            | 9-10                 |
|                      |          | <i>Case-control study</i> —Give the eligibility criteria, and the sources and methods of case ascertainment and control selection. Give the rationale for the choice of cases and controls | NA                   |
|                      |          | <i>Cross-sectional study</i> —Give the eligibility criteria, and the sources and methods of selection of participants                                                                      | NA                   |
|                      |          | (b) <i>Cohort study</i> —For matched studies, give matching criteria and number of exposed and unexposed                                                                                   | NA                   |
|                      |          | <i>Case-control study</i> —For matched studies, give matching criteria and the number of controls per case                                                                                 | NA                   |
| Variables            | 7        | Clearly define all outcomes, exposures, predictors, potential confounders, and effect modifiers. Give diagnostic criteria, if applicable                                                   | 11                   |

| Section and Item             | Item No. | Recommendation                                                                                                                                                                                    | Reported on Page No. |
|------------------------------|----------|---------------------------------------------------------------------------------------------------------------------------------------------------------------------------------------------------|----------------------|
| Data Sources/<br>Measurement | 8*       | For each variable of interest, give sources of data and details of methods of assessment (measurement). Describe comparability of assessment methods if there is more than one group              | 9-10                 |
| Bias                         | 9        | Describe any efforts to address potential sources of bias                                                                                                                                         | 10-11                |
| Study Size                   | 10       | Explain how the study size was arrived at                                                                                                                                                         | 9-10                 |
| Quantitative Variables       | 11       | Explain how quantitative variables were handled in the analyses. If applicable, describe which groupings were chosen and why                                                                      | 10-11                |
| Statistical Methods          | 12       | (a) Describe all statistical methods, including those used to control for confounding                                                                                                             | 10-13                |
|                              |          | (b) Describe any methods used to examine subgroups and interactions                                                                                                                               | 10-13                |
|                              |          | (c) Explain how missing data were addressed                                                                                                                                                       | 10-11                |
|                              |          | (d) <i>Cohort study</i> —If applicable, explain how loss to follow-up was addressed                                                                                                               | 10-11                |
|                              |          | <i>Case-control study</i> —If applicable, explain how matching of cases and controls was addressed                                                                                                | NA                   |
|                              |          | <i>Cross-sectional study</i> —If applicable, describe analytical methods taking account of sampling strategy                                                                                      | NA                   |
|                              |          | (e) Describe any sensitivity analyses                                                                                                                                                             | 13                   |
| <b>Results</b>               |          |                                                                                                                                                                                                   |                      |
| Participants                 | 13*      | (a) Report numbers of individuals at each stage of study—eg numbers potentially eligible, examined for eligibility, confirmed eligible, included in the study, completing follow-up, and analysed | 9,14,15              |
|                              |          | (b) Give reasons for non-participation at each stage                                                                                                                                              | 9-11                 |
|                              |          | (c) Consider use of a flow diagram                                                                                                                                                                | Figure 1             |
| Descriptive Data             | 14*      | (a) Give characteristics of study participants (eg demographic, clinical, social) and information on exposures and potential confounders                                                          | 9-11, Table S2       |
|                              |          | (b) Indicate number of participants with missing data for each variable of interest                                                                                                               | 11, Table S2         |
|                              |          | (c) <i>Cohort study</i> —Summarise follow-up time (eg, average and total amount)                                                                                                                  | 9-10                 |
| Outcome Data                 | 15*      | <i>Cohort study</i> —Report numbers of outcome events or summary measures over time                                                                                                               | 9,10,14,15           |
|                              |          | <i>Case-control study</i> —Report numbers in each exposure category, or summary measures of exposure                                                                                              | NA                   |
|                              |          | <i>Cross-sectional study</i> —Report numbers of outcome events or summary measures                                                                                                                | NA                   |

| Section and Item         | Item No. | Recommendation                                                                                                                                                                                               | Reported on Page No. |
|--------------------------|----------|--------------------------------------------------------------------------------------------------------------------------------------------------------------------------------------------------------------|----------------------|
| Main Results             | 16       | (a) Give unadjusted estimates and, if applicable, confounder-adjusted estimates and their precision (eg, 95% confidence interval). Make clear which confounders were adjusted for and why they were included | 16                   |
|                          |          | (b) Report category boundaries when continuous variables were categorized                                                                                                                                    | NA                   |
|                          |          | (c) If relevant, consider translating estimates of relative risk into absolute risk for a meaningful time period                                                                                             | NA                   |
| Other Analyses           | 17       | Report other analyses done—eg analyses of subgroups and interactions, and sensitivity analyses                                                                                                               | 16, Tables S3 to S5  |
| <b>Discussion</b>        |          |                                                                                                                                                                                                              |                      |
| Key Results              | 18       | Summarise key results with reference to study objectives                                                                                                                                                     | 21                   |
| Limitations              | 19       | Discuss limitations of the study, taking into account sources of potential bias or imprecision. Discuss both direction and magnitude of any potential bias                                                   | 20                   |
| Interpretation           | 20       | Give a cautious overall interpretation of results considering objectives, limitations, multiplicity of analyses, results from similar studies, and other relevant evidence                                   | 21                   |
| Generalisability         | 21       | Discuss the generalisability (external validity) of the study results                                                                                                                                        | 20                   |
| <b>Other Information</b> |          |                                                                                                                                                                                                              |                      |
| Funding                  | 22       | Give the source of funding and the role of the funders for the present study and, if applicable, for the original study on which the present article is based                                                | 14                   |

\*Give information separately for cases and controls in case-control studies and, if applicable, for exposed and unexposed groups in cohort and cross-sectional studies.

Once you have completed this checklist, please save a copy and upload it as part of your submission. DO NOT include this checklist as part of the main manuscript document. It must be uploaded as a separate file.

TRIPOD Checklist: Prediction Model Development

| Section/Topic                | Item | Checklist Item                                                                                                                                                                                        | Page                 |
|------------------------------|------|-------------------------------------------------------------------------------------------------------------------------------------------------------------------------------------------------------|----------------------|
| <b>Title and abstract</b>    |      |                                                                                                                                                                                                       |                      |
| Title                        | 1    | Identify the study as developing and/or validating a multivariable prediction model, the target population, and the outcome to be predicted.                                                          | 1                    |
| Abstract                     | 2    | Provide a summary of objectives, study design, setting, participants, sample size, predictors, outcome, statistical analysis, results, and conclusions.                                               | 3                    |
| <b>Introduction</b>          |      |                                                                                                                                                                                                       |                      |
| Background and objectives    | 3a   | Explain the medical context (including whether diagnostic or prognostic) and rationale for developing or validating the multivariable prediction model, including references to existing models.      | 8-9                  |
|                              | 3b   | Specify the objectives, including whether the study describes the development or validation of the model or both.                                                                                     | 9                    |
| <b>Methods</b>               |      |                                                                                                                                                                                                       |                      |
| Source of data               | 4a   | Describe the study design or source of data (e.g., randomized trial, cohort, or registry data), separately for the development and validation data sets, if applicable.                               | 9-10                 |
|                              | 4b   | Specify the key study dates, including start of accrual; end of accrual; and, if applicable, end of follow-up.                                                                                        | 9-10                 |
| Participants                 | 5a   | Specify key elements of the study setting (e.g., primary care, secondary care, general population) including number and location of centres.                                                          | 9-10                 |
|                              | 5b   | Describe eligibility criteria for participants.                                                                                                                                                       | 9-10                 |
|                              | 5c   | Give details of treatments received, if relevant.                                                                                                                                                     | NA                   |
| Outcome                      | 6a   | Clearly define the outcome that is predicted by the prediction model, including how and when assessed.                                                                                                | 11-12                |
|                              | 6b   | Report any actions to blind assessment of the outcome to be predicted.                                                                                                                                | 11-12                |
| Predictors                   | 7a   | Clearly define all predictors used in developing or validating the multivariable prediction model, including how and when they were measured.                                                         | 11-12                |
|                              | 7b   | Report any actions to blind assessment of predictors for the outcome and other predictors.                                                                                                            | 11-12                |
| Sample size                  | 8    | Explain how the study size was arrived at.                                                                                                                                                            | 9-10                 |
| Missing data                 | 9    | Describe how missing data were handled (e.g., complete-case analysis, single imputation, multiple imputation) with details of any imputation method.                                                  | 10-11                |
| Statistical analysis methods | 10a  | Describe how predictors were handled in the analyses.                                                                                                                                                 | 10-13                |
|                              | 10b  | Specify type of model, all model-building procedures (including any predictor selection), and method for internal validation.                                                                         | 11-13                |
|                              | 10d  | Specify all measures used to assess model performance and, if relevant, to compare multiple models.                                                                                                   | 11,13                |
| Risk groups                  | 11   | Provide details on how risk groups were created, if done.                                                                                                                                             | NA                   |
| <b>Results</b>               |      |                                                                                                                                                                                                       |                      |
| Participants                 | 13a  | Describe the flow of participants through the study, including the number of participants with and without the outcome and, if applicable, a summary of the follow-up time. A diagram may be helpful. | 9,10,14,15,fig 1     |
|                              | 13b  | Describe the characteristics of the participants (basic demographics, clinical features, available predictors), including the number of participants with missing data for predictors and outcome.    | 9,10,14,15, table S2 |
| Model development            | 14a  | Specify the number of participants and outcome events in each analysis.                                                                                                                               | 9,10                 |
|                              | 14b  | If done, report the unadjusted association between each candidate predictor and outcome.                                                                                                              | NA                   |
| Model specification          | 15a  | Present the full prediction model to allow predictions for individuals (i.e., all regression coefficients, and model intercept or baseline survival at a given time point).                           | 17                   |
|                              | 15b  | Explain how to use the prediction model.                                                                                                                                                              | 17                   |
| Model performance            | 16   | Report performance measures (with CIs) for the prediction model.                                                                                                                                      | 17                   |
| <b>Discussion</b>            |      |                                                                                                                                                                                                       |                      |
| Limitations                  | 18   | Discuss any limitations of the study (such as nonrepresentative sample, few events per predictor, missing data).                                                                                      | 20-21                |
| Interpretation               | 19b  | Give an overall interpretation of the results, considering objectives, limitations, and results from similar studies, and other relevant evidence.                                                    | 19-21                |
| Implications                 | 20   | Discuss the potential clinical use of the model and implications for future research.                                                                                                                 | 17-19, 21            |
| <b>Other information</b>     |      |                                                                                                                                                                                                       |                      |
| Supplementary information    | 21   | Provide information about the availability of supplementary resources, such as study protocol, Web calculator, and data sets.                                                                         | 16, 21               |
| Funding                      | 22   | Give the source of funding and the role of the funders for the present study.                                                                                                                         | 14,21                |

We recommend using the TRIPOD Checklist in conjunction with the TRIPOD Explanation and Elaboration document.

# Exploratory Data Analysis Report on the PARALS Registry

Report by dlookr package

2021-07-23

- 1 Introduction
  - 1.1 Information of Dataset
  - 1.2 Information of Variables
  - 1.3 About EDA Report
- 2 Univariate Analysis
  - 2.1 Descriptive Statistics
  - 2.2 Normality Test of Numerical Variables
    - 2.2.1 Statistics and Visualization of (Sample) Data
- 3 Relationship Between Variables
  - 3.1 Correlation Coefficient
    - 3.1.1 Correlation Coefficient by Variable Combination
    - 3.1.2 Correlation Plot of Numerical Variables
- 4 Target based Analysis
  - 4.1 Grouped Descriptive Statistics
    - 4.1.1 Grouped Numerical Variables
    - 4.1.2 Grouped Categorical Variables
  - 4.2 Grouped Relationship Between Variables
    - 4.2.1 Grouped Correlation Coefficient
    - 4.2.2 Grouped Correlation Plot of Numerical Variables

## 1 Introduction

The EDA Report provides exploratory data analysis information on objects that inherit `data.frame` and `data.frame`.

### 1.1 Information of Dataset

The dataset that generated the EDA Report is an **'data.frame'** object. It consists of **2,858 observations** and **66 variables**.

### 1.2 Information of Variables

The variable information of the data set that generated the EDA Report is shown in the following table.:

Information of Variables

| variables        | types   | missing_count | missing_percent | unique_count | unique_rate |
|------------------|---------|---------------|-----------------|--------------|-------------|
| Age at diagnosis | numeric | 0             | 0.000000        | 865          | 0.3026592   |



|                                   |           |      |            |      |           |
|-----------------------------------|-----------|------|------------|------|-----------|
| Age at symptom onset              | numeric   | 0    | 0.0000000  | 884  | 0.3093072 |
| ALSFRS1                           | integer   | 486  | 17.0048985 | 6    | 0.0020994 |
| ALSFRS2                           | integer   | 486  | 17.0048985 | 6    | 0.0020994 |
| ALSFRS3                           | integer   | 486  | 17.0048985 | 6    | 0.0020994 |
| ALSFRS4                           | integer   | 486  | 17.0048985 | 6    | 0.0020994 |
| ALSFRS5                           | integer   | 486  | 17.0048985 | 6    | 0.0020994 |
| ALSFRS6                           | integer   | 486  | 17.0048985 | 6    | 0.0020994 |
| ALSFRS7                           | integer   | 486  | 17.0048985 | 6    | 0.0020994 |
| ALSFRS8                           | integer   | 486  | 17.0048985 | 6    | 0.0020994 |
| ALSFRS9                           | integer   | 486  | 17.0048985 | 6    | 0.0020994 |
| ALSFRS10                          | integer   | 486  | 17.0048985 | 6    | 0.0020994 |
| ALSFRS11                          | integer   | 486  | 17.0048985 | 6    | 0.0020994 |
| ALSFRS12                          | integer   | 486  | 17.0048985 | 6    | 0.0020994 |
| First ALSFRS-R total              | integer   | 486  | 17.0048985 | 42   | 0.0146956 |
| Anatomical level at onset         | character | 0    | 0.0000000  | 6    | 0.0020994 |
| Ataxia                            | character | 0    | 0.0000000  | 2    | 0.0006998 |
| BMI 2 years prior to illness      | numeric   | 900  | 31.4905528 | 1003 | 0.3509447 |
| BMI at diagnosis                  | numeric   | 853  | 29.8460462 | 1087 | 0.3803359 |
| C9orf72 status                    | character | 1437 | 50.2799160 | 3    | 0.0010497 |
| Cancer                            | character | 0    | 0.0000000  | 2    | 0.0006998 |
| Cancer type                       | character | 2724 | 95.3114066 | 32   | 0.0111966 |
| Chorea                            | character | 0    | 0.0000000  | 2    | 0.0006998 |
| Clinical type at one year         | character | 1    | 0.0349895  | 7    | 0.0024493 |
| Clinical type at onset            | character | 0    | 0.0000000  | 4    | 0.0013996 |
| Cognitive impairment present      | character | 1884 | 65.9202239 | 3    | 0.0010497 |
| Cognitive status 1                | character | 1884 | 65.9202239 | 6    | 0.0020994 |
| Cognitive status 2                | character | 2063 | 72.1833450 | 7    | 0.0024493 |
| COPD                              | character | 0    | 0.0000000  | 2    | 0.0006998 |
| Delay in diagnosis (days)         | integer   | 0    | 0.0000000  | 191  | 0.0668300 |
| Diabetes                          | character | 42   | 1.4695591  | 3    | 0.0010497 |
| Education                         | character | 145  | 5.0734780  | 7    | 0.0024493 |
| El Escorial category at diagnosis | character | 0    | 0.0000000  | 5    | 0.0017495 |
| El Escorial category at visit 2   | character | 2116 | 74.0377887 | 5    | 0.0017495 |

|                                            |           |      |             |      |           |
|--------------------------------------------|-----------|------|-------------|------|-----------|
| El Escorial category at visit 3            | character | 2676 | 93.6319104  | 5    | 0.0017495 |
| Family history of ALS                      | character | 0    | 0.0000000   | 2    | 0.0006998 |
| FVC percent at diagnosis                   | numeric   | 919  | 32.1553534  | 138  | 0.0482855 |
| Height                                     | integer   | 842  | 29.4611617  | 58   | 0.0202939 |
| Hypertension                               | character | 42   | 1.4695591   | 3    | 0.0010497 |
| Hyperthyroid                               | character | 0    | 0.0000000   | 2    | 0.0006998 |
| Hypothyroid                                | character | 0    | 0.0000000   | 2    | 0.0006998 |
| Initial diagnosis was PLS                  | character | 0    | 0.0000000   | 2    | 0.0006998 |
| Marital status                             | character | 97   | 3.3939818   | 6    | 0.0020994 |
| Mutated gene                               | character | 2689 | 94.0867740  | 8    | 0.0027992 |
| Mutation amino acid change                 | character | 2788 | 97.5507348  | 37   | 0.0129461 |
| Mutation present                           | character | 0    | 0.0000000   | 2    | 0.0006998 |
| NIPPV                                      | character | 279  | 9.7620714   | 3    | 0.0010497 |
| Onset side                                 | character | 1082 | 37.8586424  | 4    | 0.0013996 |
| Parkinsonism                               | character | 0    | 0.0000000   | 2    | 0.0006998 |
| PEG inserted                               | character | 298  | 10.4268719  | 3    | 0.0010497 |
| Place of birth                             | logical   | 2858 | 100.0000000 | 1    | 0.0003499 |
| Place of residence                         | logical   | 2858 | 100.0000000 | 1    | 0.0003499 |
| Rate of decline ALSFRS-R (per month)       | numeric   | 491  | 17.1798460  | 1632 | 0.5710287 |
| Rate of decline BMI (per month)            | numeric   | 900  | 31.4905528  | 1380 | 0.4828551 |
| Sex                                        | character | 1    | 0.0349895   | 3    | 0.0010497 |
| Site of symptom onset                      | character | 0    | 0.0000000   | 3    | 0.0010497 |
| Smoker                                     | character | 855  | 29.9160252  | 4    | 0.0013996 |
| Survival (days)                            | integer   | 5    | 0.1749475   | 1598 | 0.5591323 |
| Time of first ALSFRS-R (days into illness) | integer   | 483  | 16.8999300  | 812  | 0.2841148 |
| Time of NIPPV (days into illness)          | integer   | 1998 | 69.9090273  | 257  | 0.0899230 |
| Time of PEG (days into illness)            | integer   | 1971 | 68.9643107  | 665  | 0.2326802 |
| Time of tracheostomy (days into illness)   | integer   | 2495 | 87.2988104  | 330  | 0.1154654 |
| Tracheostomy                               | character | 83   | 2.9041288   | 3    | 0.0010497 |
| Vital status                               | character | 4    | 0.1399580   | 3    | 0.0010497 |

|                                 |         |     |            |     |           |
|---------------------------------|---------|-----|------------|-----|-----------|
| Weight 2 years prior to illness | numeric | 868 | 30.3708887 | 108 | 0.0377887 |
| Weight at diagnosis             | numeric | 810 | 28.3414976 | 126 | 0.0440868 |

The target variable of the data is **'Clinical type at one year'**, and the data type of the variable is **character**.

## 1.3 About EDA Report

EDA reports provide information and visualization results that support the EDA process. In particular, it provides a variety of information to understand the relationship between the target variable and the rest of the variables of interest.

## 2 Univariate Analysis

### 2.1 Descriptive Statistics

#### edaData

66 Variables 2858 Observations

#### Age at diagnosis

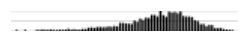

| n    | missing | distinct | Info | Mean  | Gmd   | .05   | .10   | .25   | .50   | .75   | .90   | .95   |
|------|---------|----------|------|-------|-------|-------|-------|-------|-------|-------|-------|-------|
| 2858 | 0       | 865      | 1    | 66.82 | 12.23 | 45.99 | 52.14 | 60.51 | 68.18 | 74.49 | 79.58 | 82.67 |

lowest : 16.91781 20.49315 24.16438 24.75342 25.91781 , highest: 89.58904 89.67123 90.58904 91.00000 91.91781

#### Age at symptom onset

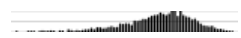

| n    | missing | distinct | Info | Mean  | Gmd   | .05   | .10   | .25   | .50   | .75   | .90   | .95   |
|------|---------|----------|------|-------|-------|-------|-------|-------|-------|-------|-------|-------|
| 2858 | 0       | 884      | 1    | 65.86 | 12.25 | 45.07 | 51.23 | 59.58 | 67.25 | 73.51 | 78.59 | 81.75 |

lowest : 15.91781 20.32877 21.34247 21.67123 24.16438 , highest: 89.00000 89.24658 89.75342 90.00000 91.42466

#### ALSFRS1

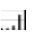

| n    | missing | distinct | Info  | Mean  | Gmd   |
|------|---------|----------|-------|-------|-------|
| 2372 | 486     | 5        | 0.822 | 3.309 | 0.855 |

lowest : 0 1 2 3 4 , highest: 0 1 2 3 4

| Value      | 0     | 1     | 2     | 3     | 4     |
|------------|-------|-------|-------|-------|-------|
| Frequency  | 52    | 53    | 205   | 863   | 1199  |
| Proportion | 0.022 | 0.022 | 0.086 | 0.364 | 0.505 |

#### ALSFRS2

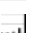

| n    | missing | distinct | Info  | Mean | Gmd  |
|------|---------|----------|-------|------|------|
| 2372 | 486     | 5        | 0.567 | 3.68 | 0.51 |

lowest : 0 1 2 3 4 , highest: 0 1 2 3 4

|            |       |       |       |       |       |
|------------|-------|-------|-------|-------|-------|
| Value      | 0     | 1     | 2     | 3     | 4     |
| Frequency  | 5     | 26    | 104   | 452   | 1785  |
| Proportion | 0.002 | 0.011 | 0.044 | 0.191 | 0.753 |

### ALSFRS3

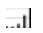

| n    | missing | distinct | Info  | Mean  | Gmd    |
|------|---------|----------|-------|-------|--------|
| 2372 | 486     | 5        | 0.797 | 3.382 | 0.8017 |

lowest: 0 1 2 3 4, highest: 0 1 2 3 4

|            |       |       |       |       |       |
|------------|-------|-------|-------|-------|-------|
| Value      | 0     | 1     | 2     | 3     | 4     |
| Frequency  | 43    | 29    | 214   | 779   | 1307  |
| Proportion | 0.018 | 0.012 | 0.090 | 0.328 | 0.551 |

### ALSFRS4

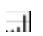

| n    | missing | distinct | Info | Mean  | Gmd    |
|------|---------|----------|------|-------|--------|
| 2372 | 486     | 5        | 0.83 | 3.297 | 0.8436 |

lowest: 0 1 2 3 4, highest: 0 1 2 3 4

|            |       |       |       |       |       |
|------------|-------|-------|-------|-------|-------|
| Value      | 0     | 1     | 2     | 3     | 4     |
| Frequency  | 33    | 67    | 223   | 889   | 1160  |
| Proportion | 0.014 | 0.028 | 0.094 | 0.375 | 0.489 |

### ALSFRS5

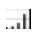

| n    | missing | distinct | Info  | Mean  | Gmd    |
|------|---------|----------|-------|-------|--------|
| 2372 | 486     | 5        | 0.849 | 3.224 | 0.9397 |

lowest: 0 1 2 3 4, highest: 0 1 2 3 4

|            |       |       |       |       |       |
|------------|-------|-------|-------|-------|-------|
| Value      | 0     | 1     | 2     | 3     | 4     |
| Frequency  | 39    | 100   | 292   | 801   | 1140  |
| Proportion | 0.016 | 0.042 | 0.123 | 0.338 | 0.481 |

### ALSFRS6

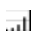

| n    | missing | distinct | Info  | Mean  | Gmd    |
|------|---------|----------|-------|-------|--------|
| 2372 | 486     | 5        | 0.846 | 3.209 | 0.9902 |

lowest: 0 1 2 3 4, highest: 0 1 2 3 4

|            |       |       |       |       |       |
|------------|-------|-------|-------|-------|-------|
| Value      | 0     | 1     | 2     | 3     | 4     |
| Frequency  | 53    | 114   | 298   | 727   | 1180  |
| Proportion | 0.022 | 0.048 | 0.126 | 0.306 | 0.497 |

**ALSFRS7**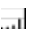

| n    | missing | distinct | Info | Mean  | Gmd    |
|------|---------|----------|------|-------|--------|
| 2372 | 486     | 5        | 0.77 | 3.382 | 0.8645 |

lowest: 0 1 2 3 4, highest: 0 1 2 3 4

| Value      | 0     | 1     | 2     | 3     | 4     |
|------------|-------|-------|-------|-------|-------|
| Frequency  | 49    | 80    | 200   | 631   | 1412  |
| Proportion | 0.021 | 0.034 | 0.084 | 0.266 | 0.595 |

**ALSFRS8**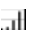

| n    | missing | distinct | Info  | Mean  | Gmd    |
|------|---------|----------|-------|-------|--------|
| 2372 | 486     | 5        | 0.878 | 3.121 | 0.9685 |

lowest: 0 1 2 3 4, highest: 0 1 2 3 4

| Value      | 0     | 1     | 2     | 3     | 4     |
|------------|-------|-------|-------|-------|-------|
| Frequency  | 34    | 91    | 419   | 837   | 991   |
| Proportion | 0.014 | 0.038 | 0.177 | 0.353 | 0.418 |

**ALSFRS9**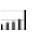

| n    | missing | distinct | Info  | Mean  | Gmd   |
|------|---------|----------|-------|-------|-------|
| 2372 | 486     | 5        | 0.916 | 2.691 | 1.492 |

lowest: 0 1 2 3 4, highest: 0 1 2 3 4

| Value      | 0     | 1     | 2     | 3     | 4     |
|------------|-------|-------|-------|-------|-------|
| Frequency  | 231   | 323   | 364   | 484   | 970   |
| Proportion | 0.097 | 0.136 | 0.153 | 0.204 | 0.409 |

**ALSFRS10**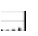

| n    | missing | distinct | Info  | Mean  | Gmd    |
|------|---------|----------|-------|-------|--------|
| 2372 | 486     | 5        | 0.405 | 3.735 | 0.4703 |

lowest: 0 1 2 3 4, highest: 0 1 2 3 4

| Value      | 0     | 1     | 2     | 3     | 4     |
|------------|-------|-------|-------|-------|-------|
| Frequency  | 48    | 11    | 85    | 234   | 1994  |
| Proportion | 0.020 | 0.005 | 0.036 | 0.099 | 0.841 |

**ALSFRS11**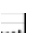

| n    | missing | distinct | Info  | Mean  | Gmd    |
|------|---------|----------|-------|-------|--------|
| 2372 | 486     | 5        | 0.347 | 3.812 | 0.3376 |

lowest : 0 1 2 3 4 , highest: 0 1 2 3 4

|            |       |       |       |       |       |
|------------|-------|-------|-------|-------|-------|
| Value      | 0     | 1     | 2     | 3     | 4     |
| Frequency  | 14    | 10    | 69    | 222   | 2057  |
| Proportion | 0.006 | 0.004 | 0.029 | 0.094 | 0.867 |

## ALSFRS12

| n    | missing | distinct | Info  | Mean  | Gmd    |
|------|---------|----------|-------|-------|--------|
| 2372 | 486     | 5        | 0.107 | 3.916 | 0.1635 |

lowest : 0 1 2 3 4 , highest: 0 1 2 3 4

|            |       |       |       |       |       |
|------------|-------|-------|-------|-------|-------|
| Value      | 0     | 1     | 2     | 3     | 4     |
| Frequency  | 24    | 8     | 23    | 33    | 2284  |
| Proportion | 0.010 | 0.003 | 0.010 | 0.014 | 0.963 |

## First ALSFRS-R total

| n    | missing | distinct | Info | Mean  | Gmd   | .05 | .10 | .25 | .50 | .75 | .90 | .95 |
|------|---------|----------|------|-------|-------|-----|-----|-----|-----|-----|-----|-----|
| 2372 | 486     | 41       | 0.99 | 40.76 | 6.333 | 27  | 32  | 39  | 43  | 45  | 46  | 46  |

lowest : 5 8 10 11 12 , highest: 44 45 46 47 48

## Anatomical level at onset

| n    | missing | distinct |
|------|---------|----------|
| 2858 | 0       | 6        |

|          |                    |                      |                      |                    |                      |
|----------|--------------------|----------------------|----------------------|--------------------|----------------------|
| lowest : | bulbar             | lower_limbs_distal   | lower_limbs_proximal | respiratory        | upper_limbs_distal   |
| highest: | lower_limbs_distal | lower_limbs_proximal | respiratory          | upper_limbs_distal | upper_limbs_proximal |

|            |             |                    |                      |
|------------|-------------|--------------------|----------------------|
| Value      | bulbar      | lower_limbs_distal | lower_limbs_proximal |
| Frequency  | 1009        | 908                | 115                  |
| Proportion | 0.353       | 0.318              | 0.040                |
| Value      | respiratory | upper_limbs_distal | upper_limbs_proximal |
| Frequency  | 48          | 617                | 161                  |
| Proportion | 0.017       | 0.216              | 0.056                |

## Ataxia

| n    | missing | distinct |
|------|---------|----------|
| 2858 | 0       | 2        |

|            |      |     |
|------------|------|-----|
| Value      | no   | yes |
| Frequency  | 2857 | 1   |
| Proportion | 1    | 0   |

## BMI 2 years prior to illness

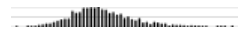

| n    | missing | distinct | Info | Mean  | Gmd   | .05   | .10   | .25   | .50   | .75   | .90   | .95   |
|------|---------|----------|------|-------|-------|-------|-------|-------|-------|-------|-------|-------|
| 1958 | 900     | 1002     | 1    | 25.96 | 4.477 | 20.08 | 21.26 | 23.26 | 25.39 | 28.23 | 31.22 | 33.33 |

lowest : 14.53287 15.88697 16.00000 16.02307 16.67585 , highest: 42.43663 42.46114 43.28824 43.42857 43.50039

## BMI at diagnosis

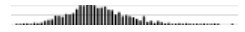

| n    | missing | distinct | Info | Mean  | Gmd   | .05   | .10   | .25   | .50   | .75   | .90   | .95   |
|------|---------|----------|------|-------|-------|-------|-------|-------|-------|-------|-------|-------|
| 2005 | 853     | 1086     | 1    | 24.45 | 4.611 | 18.27 | 19.37 | 21.77 | 24.09 | 26.83 | 29.78 | 31.63 |

lowest : 13.23605 13.38797 13.84083 14.17769 14.19686 , highest: 41.01562 41.08839 41.40163 41.64931 43.42857

## C9orf72 status

| n    | missing | distinct |
|------|---------|----------|
| 1421 | 1437    | 2        |

```
Value      EXP  WT
Frequency  100 1321
Proportion 0.07 0.93
```

## Cancer

| n    | missing | distinct |
|------|---------|----------|
| 2858 | 0       | 2        |

```
Value      no  yes
Frequency  2722 136
Proportion 0.952 0.048
```

## Cancer type

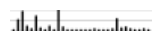

| n   | missing | distinct |
|-----|---------|----------|
| 134 | 2724    | 31       |

lowest : bile\_duct bladder breast chronic\_lymphoid\_leukemia chronic\_myeloid\_leukemia  
highest: stomach thymoma thyroid uterus vulva

## Chorea

| n    | missing | distinct |
|------|---------|----------|
| 2858 | 0       | 2        |

|            |      |     |
|------------|------|-----|
| Value      | no   | yes |
| Frequency  | 2857 | 1   |
| Proportion | 1    | 0   |

### Clinical type at one year

| n    | missing | distinct |
|------|---------|----------|
| 2857 | 1       | 6        |

|          |           |           |          |           |             |
|----------|-----------|-----------|----------|-----------|-------------|
| lowest:  | bulbar    | classical | flailArm | flailLeg  | pyramidal   |
| highest: | classical | flailArm  | flailLeg | pyramidal | respiratory |

|            |        |           |          |          |           |             |
|------------|--------|-----------|----------|----------|-----------|-------------|
| Value      | bulbar | classical | flailArm | flailLeg | pyramidal | respiratory |
| Frequency  | 1009   | 841       | 188      | 531      | 240       | 48          |
| Proportion | 0.353  | 0.294     | 0.066    | 0.186    | 0.084     | 0.017       |

### Clinical type at onset

| n    | missing | distinct |
|------|---------|----------|
| 2858 | 0       | 4        |

|            |        |           |                |                |
|------------|--------|-----------|----------------|----------------|
| Value      | bulbar | classical | LMNpredominant | UMNpredominant |
| Frequency  | 893    | 1030      | 501            | 434            |
| Proportion | 0.312  | 0.360     | 0.175          | 0.152          |

### Cognitive impairment present

| n   | missing | distinct |
|-----|---------|----------|
| 974 | 1884    | 2        |

|            |       |       |
|------------|-------|-------|
| Value      | no    | yes   |
| Frequency  | 417   | 557   |
| Proportion | 0.428 | 0.572 |

### Cognitive status 1

| n   | missing | distinct |
|-----|---------|----------|
| 974 | 1884    | 5        |

|          |       |       |     |                          |        |
|----------|-------|-------|-----|--------------------------|--------|
| lowest:  | ALSbi | ALSci | FTD | non-executive_impairment | normal |
| highest: | ALSbi | ALSci | FTD | non-executive_impairment | normal |

|           |       |       |
|-----------|-------|-------|
| Value     | ALSbi | ALSci |
| Frequency | 33    | 176   |



|            |                              |       |
|------------|------------------------------|-------|
| Proportion | 0.034                        | 0.181 |
| Value      | FTD non-executive_impairment |       |
| Frequency  | 287                          | 22    |
| Proportion | 0.295                        | 0.023 |
| Value      | normal                       |       |
| Frequency  | 456                          |       |
| Proportion | 0.468                        |       |

## Cognitive status 2

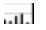

| n   | missing | distinct |
|-----|---------|----------|
| 795 | 2063    | 6        |

|          |        |        |       |                          |                          |
|----------|--------|--------|-------|--------------------------|--------------------------|
| lowest:  | ALSbi  | ALScbi | ALSci | FTD                      | non-executive_impairment |
| highest: | ALScbi | ALSci  | FTD   | non-executive_impairment | normal                   |

|            |                          |        |
|------------|--------------------------|--------|
| Value      | ALSbi                    | ALScbi |
| Frequency  | 61                       | 38     |
| Proportion | 0.077                    | 0.048  |
| Value      | ALSci                    | FTD    |
| Frequency  | 129                      | 171    |
| Proportion | 0.162                    | 0.215  |
| Value      | non-executive_impairment | normal |
| Frequency  | 16                       | 380    |
| Proportion | 0.020                    | 0.478  |

## COPD

| n    | missing | distinct |
|------|---------|----------|
| 2858 | 0       | 2        |

|            |       |       |
|------------|-------|-------|
| Value      | no    | yes   |
| Frequency  | 2656  | 202   |
| Proportion | 0.929 | 0.071 |

## Delay in diagnosis (days)

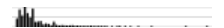

| n    | missing | distinct | Info  | Mean  | Gmd | .05 | .10 | .25 | .50 | .75 | .90 | .95 |
|------|---------|----------|-------|-------|-----|-----|-----|-----|-----|-----|-----|-----|
| 2858 | 0       | 191      | 0.999 | 347.8 | 283 | 61  | 92  | 153 | 273 | 396 | 730 | 914 |

lowest : 28 29 30 31 59 , highest: 2191 2374 2585 3226 3652

## Diabetes

| n | missing | distinct |
|---|---------|----------|
|---|---------|----------|

|            |       |       |
|------------|-------|-------|
| Value      | no    | yes   |
| Frequency  | 2514  | 302   |
| Proportion | 0.893 | 0.107 |

## Education

| n    | missing | distinct |
|------|---------|----------|
| 2713 | 145     | 6        |

|          |         |         |         |        |                |
|----------|---------|---------|---------|--------|----------------|
| lowest : | 11years | 13years | 18years | 5years | 8years         |
| highest: | 13years | 18years | 5years  | 8years | lessthan5years |

|            |         |         |         |        |
|------------|---------|---------|---------|--------|
| Value      | 11years | 13years | 18years | 5years |
| Frequency  | 184     | 359     | 132     | 1240   |
| Proportion | 0.068   | 0.132   | 0.049   | 0.457  |

|            |        |                |
|------------|--------|----------------|
| Value      | 8years | lessthan5years |
| Frequency  | 705    | 93             |
| Proportion | 0.260  | 0.034          |

## El Escorial category at diagnosis

| n    | missing | distinct |
|------|---------|----------|
| 2858 | 0       | 5        |

|          |          |          |          |                       |           |
|----------|----------|----------|----------|-----------------------|-----------|
| lowest : | definite | possible | probable | probable_labSupported | suspected |
| highest: | definite | possible | probable | probable_labSupported | suspected |

|            |          |          |          |
|------------|----------|----------|----------|
| Value      | definite | possible | probable |
| Frequency  | 1335     | 359      | 880      |
| Proportion | 0.467    | 0.126    | 0.308    |

|            |                       |           |
|------------|-----------------------|-----------|
| Value      | probable_labSupported | suspected |
| Frequency  | 169                   | 115       |
| Proportion | 0.059                 | 0.040     |

## El Escorial category at visit 2

| n   | missing | distinct |
|-----|---------|----------|
| 742 | 2116    | 4        |

|            |          |          |          |
|------------|----------|----------|----------|
| Value      | definite | possible | probable |
| Frequency  | 372      | 71       | 260      |
| Proportion | 0.501    | 0.096    | 0.350    |

|            |                       |
|------------|-----------------------|
| Value      | probable_labSupported |
| Frequency  | 39                    |
| Proportion | 0.053                 |

### El Escorial category at visit 3

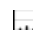

| n   | missing | distinct |
|-----|---------|----------|
| 182 | 2676    | 4        |

|            |          |          |          |
|------------|----------|----------|----------|
| Value      | definite | possible | probable |
| Frequency  | 146      | 8        | 24       |
| Proportion | 0.802    | 0.044    | 0.132    |

|            |                       |
|------------|-----------------------|
| Value      | probable_labSupported |
| Frequency  | 4                     |
| Proportion | 0.022                 |

### Family history of ALS

| n    | missing | distinct |
|------|---------|----------|
| 2858 | 0       | 2        |

|            |       |       |
|------------|-------|-------|
| Value      | no    | yes   |
| Frequency  | 2671  | 187   |
| Proportion | 0.935 | 0.065 |

### FVC percent at diagnosis

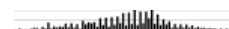

| n    | missing | distinct | Info | Mean  | Gmd   | .05 | .10 | .25 | .50 | .75 | .90 | .95 |
|------|---------|----------|------|-------|-------|-----|-----|-----|-----|-----|-----|-----|
| 1939 | 919     | 137      | 1    | 84.61 | 28.95 | 37  | 48  | 68  | 88  | 102 | 114 | 125 |

lowest : 10 17 20 21 22 , highest: 153 154 157 159 160

### Height

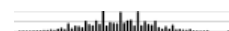

| n    | missing | distinct | Info  | Mean  | Gmd   | .05 | .10 | .25 | .50 | .75 | .90 | .95 |
|------|---------|----------|-------|-------|-------|-----|-----|-----|-----|-----|-----|-----|
| 2016 | 842     | 57       | 0.998 | 164.5 | 10.48 | 150 | 152 | 158 | 165 | 171 | 176 | 180 |

lowest : 136 137 138 139 140 , highest: 188 189 190 196 198

### Hypertension

| n    | missing | distinct |
|------|---------|----------|
| 2816 | 42      | 2        |

|            |       |       |
|------------|-------|-------|
| Value      | no    | yes   |
| Frequency  | 1609  | 1207  |
| Proportion | 0.571 | 0.429 |

## Hyperthyroid

| n    | missing | distinct |
|------|---------|----------|
| 2858 | 0       | 2        |

| Value      | no    | yes   |
|------------|-------|-------|
| Frequency  | 2814  | 44    |
| Proportion | 0.985 | 0.015 |

## Hypothyroid

| n    | missing | distinct |
|------|---------|----------|
| 2858 | 0       | 2        |

| Value      | no    | yes   |
|------------|-------|-------|
| Frequency  | 2654  | 204   |
| Proportion | 0.929 | 0.071 |

## Initial diagnosis was PLS

| n    | missing | distinct |
|------|---------|----------|
| 2858 | 0       | 2        |

| Value      | no    | yes   |
|------------|-------|-------|
| Frequency  | 2832  | 26    |
| Proportion | 0.991 | 0.009 |

## Marital status

| n    | missing | distinct |
|------|---------|----------|
| 2761 | 97      | 5        |

lowest : divorced married neverMarried separated widowed

highest: divorced married neverMarried separated widowed

| Value      | divorced | married | neverMarried | separated | widowed |
|------------|----------|---------|--------------|-----------|---------|
| Frequency  | 64       | 2034    | 245          | 52        | 366     |
| Proportion | 0.023    | 0.737   | 0.089        | 0.019     | 0.133   |

## Mutated gene

| n | missing | distinct |
|---|---------|----------|
|---|---------|----------|

169

2689

7

|          |         |                |      |        |        |
|----------|---------|----------------|------|--------|--------|
| lowest : | C9ORF72 | C9ORF72+TARDBP | FUS  | OPTN   | SOD1   |
| highest: | FUS     | OPTN           | SOD1 | TARDBP | TUBA4A |

|            |         |                |        |       |
|------------|---------|----------------|--------|-------|
| Value      | C9ORF72 | C9ORF72+TARDBP | FUS    | OPTN  |
| Frequency  | 99      | 1              | 11     | 1     |
| Proportion | 0.586   | 0.006          | 0.065  | 0.006 |
| Value      | SOD1    | TARDBP         | TUBA4A |       |
| Frequency  | 34      | 21             | 2      |       |
| Proportion | 0.201   | 0.124          | 0.012  |       |

### Mutation amino acid change

| n  | missing | distinct |
|----|---------|----------|
| 70 | 2788    | 36       |

lowest : A382T A4V D109Y D438N D90A\_het , highest: R521G S135N S393L T349S V47F

### Mutation present

| n    | missing | distinct |
|------|---------|----------|
| 2858 | 0       | 2        |

|            |       |       |
|------------|-------|-------|
| Value      | no    | yes   |
| Frequency  | 2689  | 169   |
| Proportion | 0.941 | 0.059 |

### NIPPV

| n    | missing | distinct |
|------|---------|----------|
| 2579 | 279     | 2        |

|            |       |       |
|------------|-------|-------|
| Value      | no    | yes   |
| Frequency  | 1717  | 862   |
| Proportion | 0.666 | 0.334 |

### Onset side

| n    | missing | distinct |
|------|---------|----------|
| 1776 | 1082    | 3        |

|            |       |       |       |
|------------|-------|-------|-------|
| Value      | both  | left  | right |
| Frequency  | 549   | 438   | 789   |
| Proportion | 0.309 | 0.247 | 0.444 |

## Parkinsonism

| n    | missing | distinct |
|------|---------|----------|
| 2858 | 0       | 2        |

| Value      | no    | yes   |
|------------|-------|-------|
| Frequency  | 2806  | 52    |
| Proportion | 0.982 | 0.018 |

## PEG inserted

| n    | missing | distinct |
|------|---------|----------|
| 2560 | 298     | 2        |

| Value      | no    | yes   |
|------------|-------|-------|
| Frequency  | 1670  | 890   |
| Proportion | 0.652 | 0.348 |

## Rate of decline ALSFRS-R (per month)

| n        | missing      | distinct | Info | Mean         | Gmd    | .05          | .10    | .25          | .50    | .75          | .90    | .95    |
|----------|--------------|----------|------|--------------|--------|--------------|--------|--------------|--------|--------------|--------|--------|
| 2367     | 491          | 1631     | 1    | 0.8659       | 0.8923 | 0.1066       | 0.1587 | 0.2748       | 0.5389 | 1.0332       | 1.8249 | 2.5048 |
| lowest:  | 0.000000000  |          |      | 0.008283542  |        | 0.009431045  |        | 0.027752502  |        | 0.030439122  |        |        |
| highest: | 11.090909091 |          |      | 13.401515152 |        | 14.233333333 |        | 14.724137931 |        | 30.500000000 |        |        |

## Rate of decline BMI (per month)

| n        | missing    | distinct | Info    | Mean       | Gmd     | .05        | .10     | .25        |
|----------|------------|----------|---------|------------|---------|------------|---------|------------|
| 1958     | 900        | 1379     | 0.978   | 0.04479    | 0.06829 | -0.01681   | 0.00000 | 0.00000    |
|          | .50        | .75      | .90     | .95        |         |            |         |            |
|          | 0.02511    | 0.06849  | 0.13791 | 0.18421    |         |            |         |            |
| lowest:  | -0.4680072 |          |         | -0.1600308 |         | -0.1465404 |         | -0.1253496 |
| highest: | 0.3707365  |          |         | 0.3716188  |         | 0.3719334  |         | 0.4214638  |

## Sex

| n    | missing | distinct |
|------|---------|----------|
| 2857 | 1       | 2        |

| Value      | F     | M     |
|------------|-------|-------|
| Frequency  | 1318  | 1539  |
| Proportion | 0.461 | 0.539 |

## Site of symptom onset

| n    | missing | distinct |
|------|---------|----------|
| 2858 | 0       | 3        |

| Value      | bulbar | respiratory | spinal |
|------------|--------|-------------|--------|
| Frequency  | 1009   | 48          | 1801   |
| Proportion | 0.353  | 0.017       | 0.630  |

## Smoker

| n    | missing | distinct |
|------|---------|----------|
| 2003 | 855     | 3        |

| Value      | current | former | never |
|------------|---------|--------|-------|
| Frequency  | 406     | 640    | 957   |
| Proportion | 0.203   | 0.320  | 0.478 |

## Survival (days)

| n    | missing | distinct | Info | Mean | Gmd  | .05   | .10   | .25   | .50   | .75    | .90    | .95    |
|------|---------|----------|------|------|------|-------|-------|-------|-------|--------|--------|--------|
| 2853 | 5       | 1597     | 1    | 1320 | 1138 | 261.0 | 363.2 | 581.0 | 932.0 | 1552.0 | 2737.0 | 3866.0 |

lowest : 18 33 44 64 80 , highest: 8249 8305 8584 8614 8645

## Time of first ALSFRS-R (days into illness)

| n    | missing | distinct | Info | Mean  | Gmd   | .05  | .10   | .25   | .50   | .75   | .90   | .95    |
|------|---------|----------|------|-------|-------|------|-------|-------|-------|-------|-------|--------|
| 2375 | 483     | 811      | 1    | 402.1 | 334.3 | 88.0 | 119.0 | 184.0 | 301.0 | 463.5 | 774.6 | 1077.3 |

lowest : 0 9 11 15 18 , highest: 3652 3682 3813 3820 3839

## Time of NIPPV (days into illness)

| n   | missing | distinct | Info | Mean  | Gmd   | .05   | .10   | .25   | .50   | .75    | .90    | .95    |
|-----|---------|----------|------|-------|-------|-------|-------|-------|-------|--------|--------|--------|
| 860 | 1998    | 256      | 1    | 868.9 | 669.4 | 183.9 | 273.0 | 426.0 | 699.5 | 1066.2 | 1614.0 | 2100.1 |

lowest : 0 60 61 62 89 , highest: 4717 5114 5783 6574 7152

## Time of PEG (days into illness)

| n   | missing | distinct | Info | Mean  | Gmd   | .05   | .10   | .25   | .50   | .75   | .90    | .95    |
|-----|---------|----------|------|-------|-------|-------|-------|-------|-------|-------|--------|--------|
| 887 | 1971    | 664      | 1    | 833.6 | 574.6 | 202.0 | 287.0 | 474.5 | 696.0 | 988.5 | 1506.0 | 1870.1 |

lowest : 44 80 87 94 108 , highest: 3428 3564 4372 4541 6372

## Time of tracheostomy (days into illness)

| n   | missing | distinct | Info | Mean  | Gmd   | .05   | .10   | .25   | .50   | .75    | .90    | .95    |
|-----|---------|----------|------|-------|-------|-------|-------|-------|-------|--------|--------|--------|
| 363 | 2495    | 329      | 1    | 907.7 | 644.8 | 199.0 | 256.8 | 459.0 | 787.0 | 1225.0 | 1638.0 | 2007.7 |

lowest : 18 33 44 92 106 , highest: 3084 3086 3160 3165 4505

## Tracheostomy

| n    | missing | distinct |
|------|---------|----------|
| 2775 | 83      | 2        |

```
Value      no  yes
Frequency 2412 363
Proportion 0.869 0.131
```

## Vital status

| n    | missing | distinct |
|------|---------|----------|
| 2854 | 4       | 2        |

```
Value      alive  dead
Frequency  305 2549
Proportion 0.107 0.893
```

## Weight 2 years prior to illness

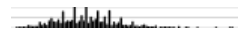

| n    | missing | distinct | Info  | Mean  | Gmd   | .05 | .10 | .25 | .50 | .75 | .90 | .95 |
|------|---------|----------|-------|-------|-------|-----|-----|-----|-----|-----|-----|-----|
| 1990 | 868     | 107      | 0.999 | 70.28 | 13.88 | 52  | 55  | 61  | 70  | 78  | 85  | 91  |

lowest : 40 41 42 43 44 , highest: 114 118 126 132 133

## Weight at diagnosis

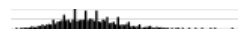

| n    | missing | distinct | Info  | Mean  | Gmd   | .05 | .10 | .25 | .50 | .75 | .90 | .95 |
|------|---------|----------|-------|-------|-------|-----|-----|-----|-----|-----|-----|-----|
| 2048 | 810     | 125      | 0.999 | 66.22 | 14.37 | 47  | 50  | 57  | 65  | 75  | 83  | 88  |

lowest : 33 35 36 37 38 , highest: 116 119 123 125 133

Variables with all observations missing:

Place of birth, Place of residence

## 2.2 Normality Test of Numerical Variables

### 2.2.1 Statistics and Visualization of (Sample) Data

[ Age at diagnosis ]



normality test : Shapiro-Wilk normality test

statistic : 0.9697, p-value : 4.08035E-24

skewness and kurtosis

| type                | skewness   | kurtosis |
|---------------------|------------|----------|
| original            | -0.7433808 | 3.787688 |
| log transformation  | -1.5836750 | 7.471166 |
| sqrt transformation | -1.1069448 | 5.045099 |

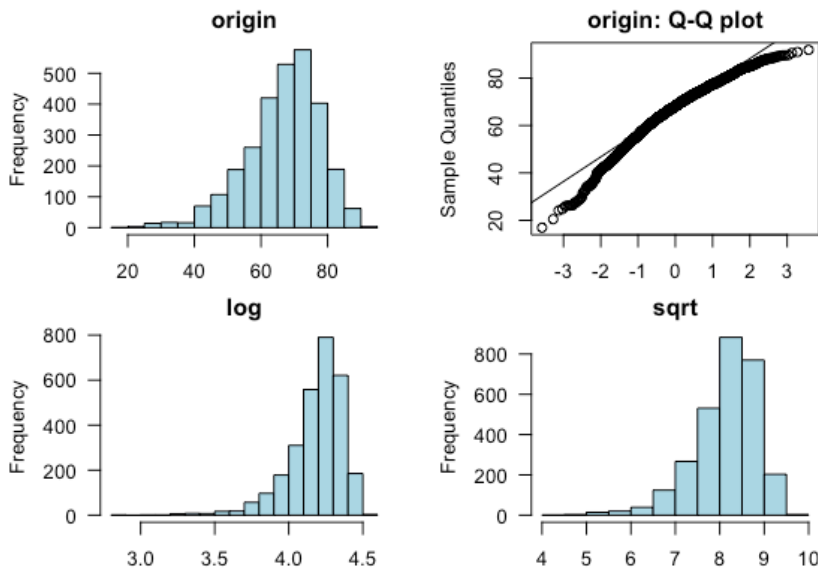

### [ Age at symptom onset ]

normality test : Shapiro-Wilk normality test

statistic : 0.97055, p-value : 8.57396E-24

skewness and kurtosis

| type                | skewness   | kurtosis |
|---------------------|------------|----------|
| original            | -0.7349793 | 3.789471 |
| log transformation  | -1.6099153 | 7.707313 |
| sqrt transformation | -1.1101840 | 5.100604 |

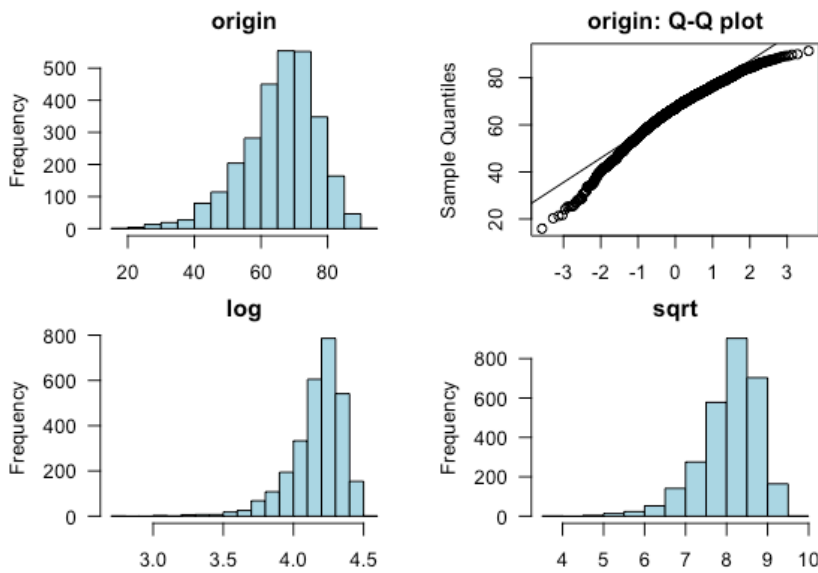

### [ ALSFRS1 ]

normality test : Shapiro-Wilk normality test

statistic : 0.73165, p-value : 3.98662E-52

skewness and kurtosis

| type                | skewness  | kurtosis  |
|---------------------|-----------|-----------|
| original            | -1.595538 | 5.922016  |
| log transformation  | NaN       | NaN       |
| sqrt transformation | -3.256496 | 16.290301 |

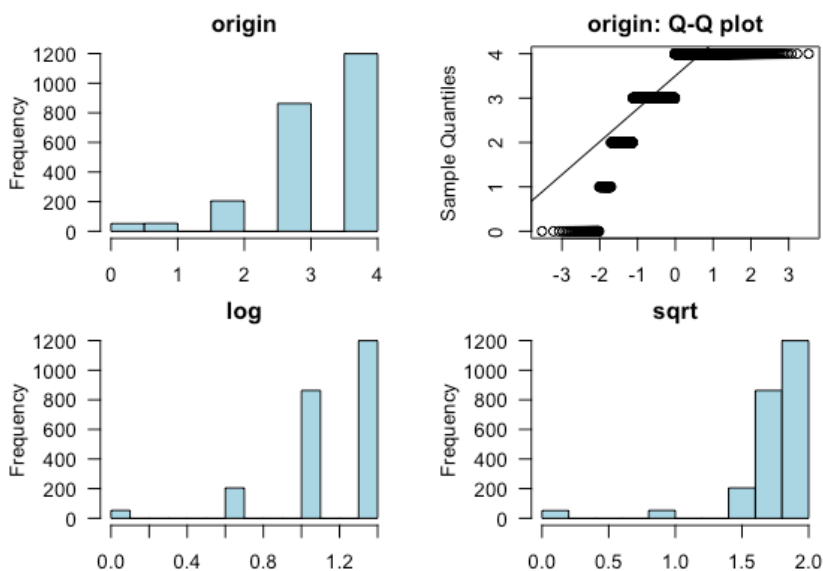

[ ALSFRS2 ]

normality test : Shapiro-Wilk normality test

statistic : 0.55904, p-value : 7.12812E-61

skewness and kurtosis

| type                | skewness  | kurtosis  |
|---------------------|-----------|-----------|
| original            | -2.244431 | 8.606259  |
| log transformation  | NaN       | NaN       |
| sqrt transformation | -3.618126 | 24.298742 |

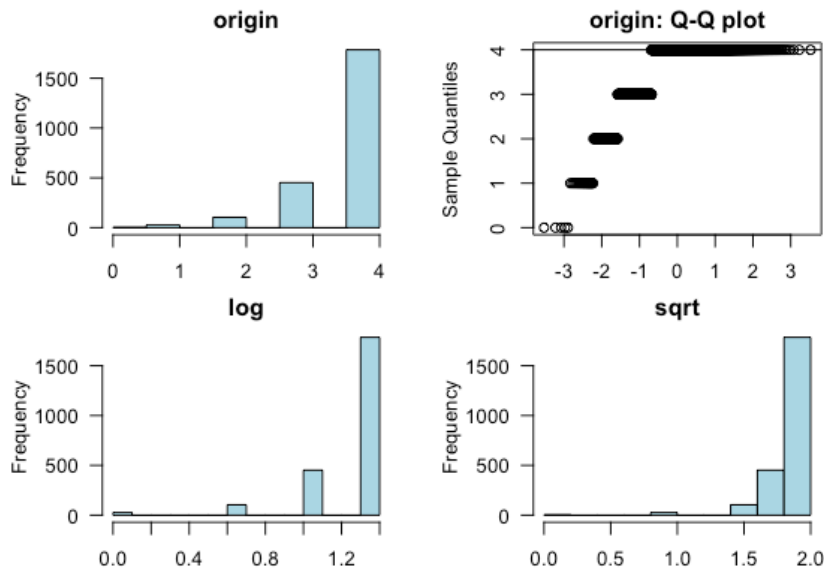

[ ALSFRS3 ]

normality test : Shapiro-Wilk normality test

statistic : 0.71181, p-value : 2.43915E-53

skewness and kurtosis

| type                | skewness  | kurtosis  |
|---------------------|-----------|-----------|
| original            | -1.668627 | 6.357821  |
| log transformation  | NaN       | NaN       |
| sqrt transformation | -3.492396 | 18.983734 |

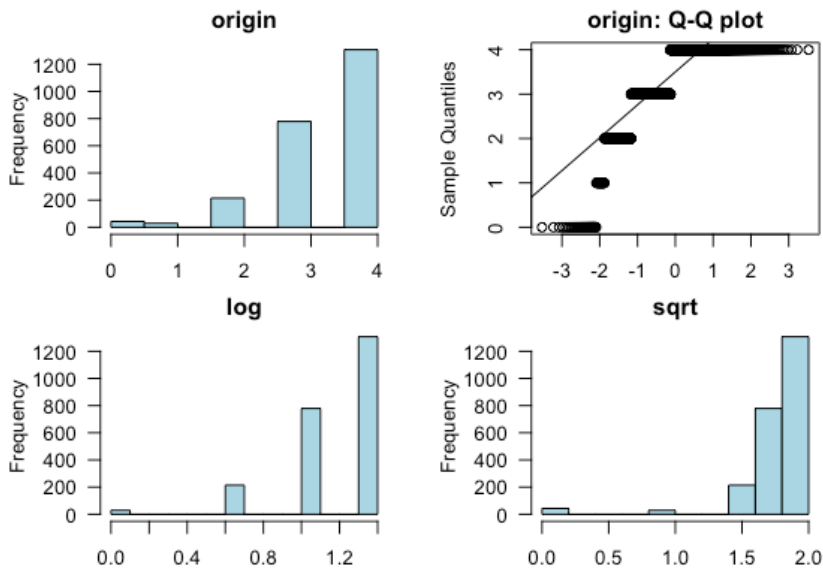

[ ALSFRS4 ]

normality test : Shapiro-Wilk normality test

statistic : 0.75214, p-value : 8.60098E-51

skewness and kurtosis

| type                | skewness  | kurtosis  |
|---------------------|-----------|-----------|
| original            | -1.410584 | 5.242386  |
| log transformation  | NaN       | NaN       |
| sqrt transformation | -3.042965 | 16.150241 |

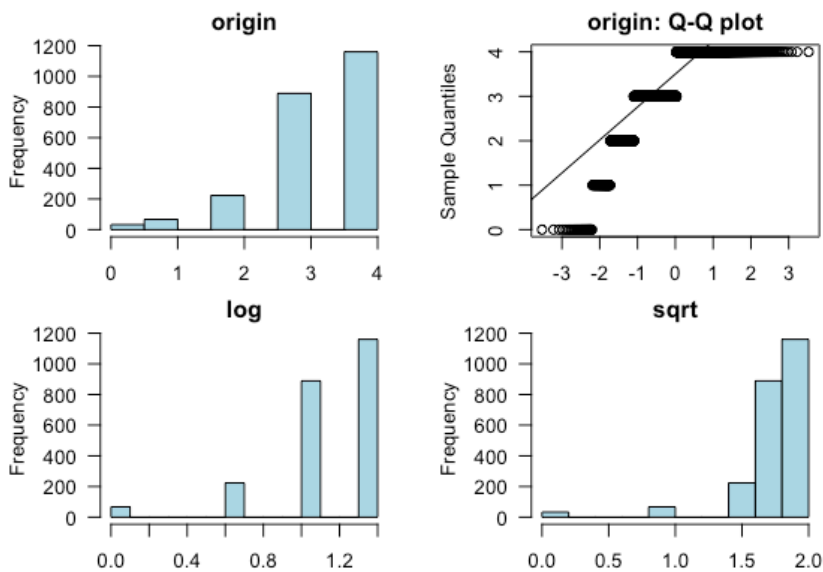

[ ALSFRS5 ]

normality test : Shapiro-Wilk normality test

statistic : 0.77326, p-value : 2.56673E-49

skewness and kurtosis

| type                | skewness  | kurtosis  |
|---------------------|-----------|-----------|
| original            | -1.255686 | 4.303177  |
| log transformation  | NaN       | NaN       |
| sqrt transformation | -2.652390 | 12.666443 |

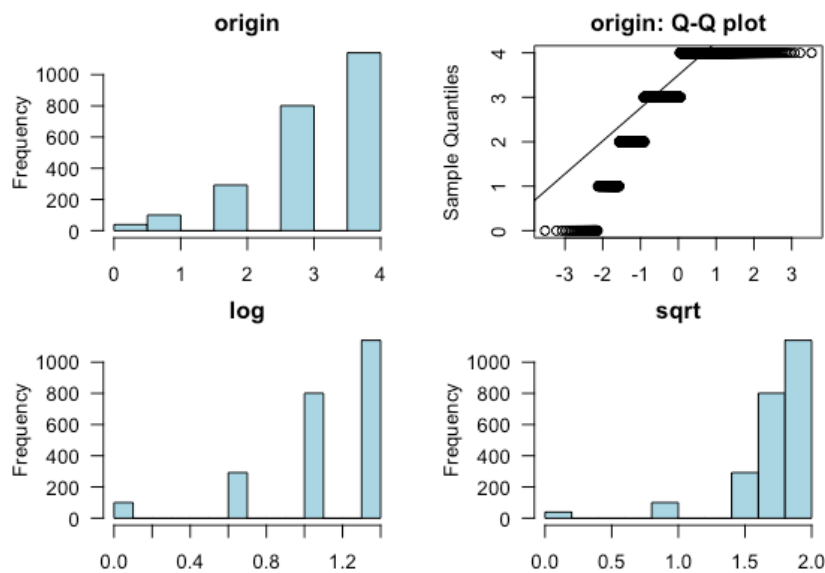

[ ALSFRS6 ]

normality test : Shapiro-Wilk normality test

statistic : 0.76647, p-value : 8.38756E-50

skewness and kurtosis

| type                | skewness  | kurtosis  |
|---------------------|-----------|-----------|
| original            | -1.286043 | 4.200638  |
| log transformation  | NaN       | NaN       |
| sqrt transformation | -2.605095 | 11.556253 |

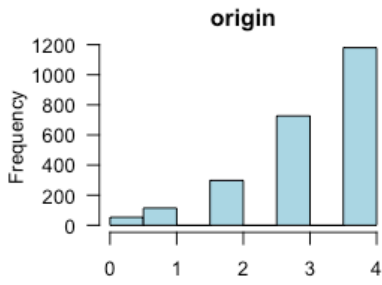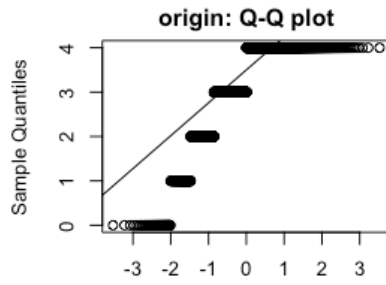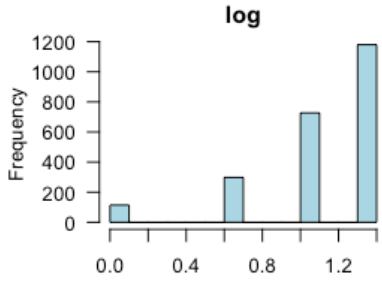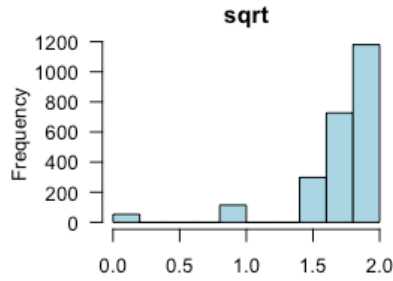

[ ALSFRS7 ]

normality test : Shapiro-Wilk normality test

statistic : 0.69116, p-value : 1.57169E-54

skewness and kurtosis

| type                | skewness  | kurtosis  |
|---------------------|-----------|-----------|
| original            | -1.708816 | 5.728035  |
| log transformation  | NaN       | NaN       |
| sqrt transformation | -3.116444 | 14.837037 |

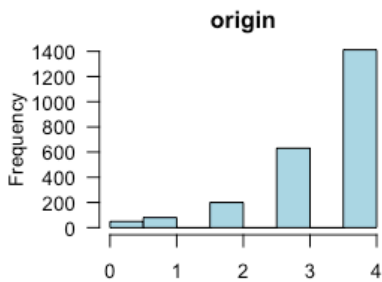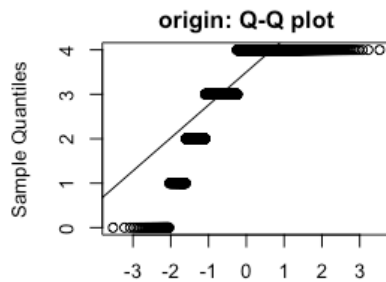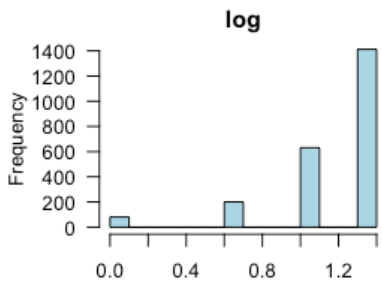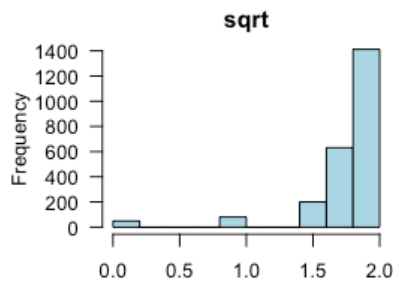

[ ALSFRS8 ]

normality test : Shapiro-Wilk normality test

statistic : 0.81361, p-value : 3.76053E-46

skewness and kurtosis

| type                | skewness   | kurtosis  |
|---------------------|------------|-----------|
| original            | -0.9601278 | 3.586815  |
| log transformation  | NaN        | NaN       |
| sqrt transformation | -2.3705254 | 11.684958 |

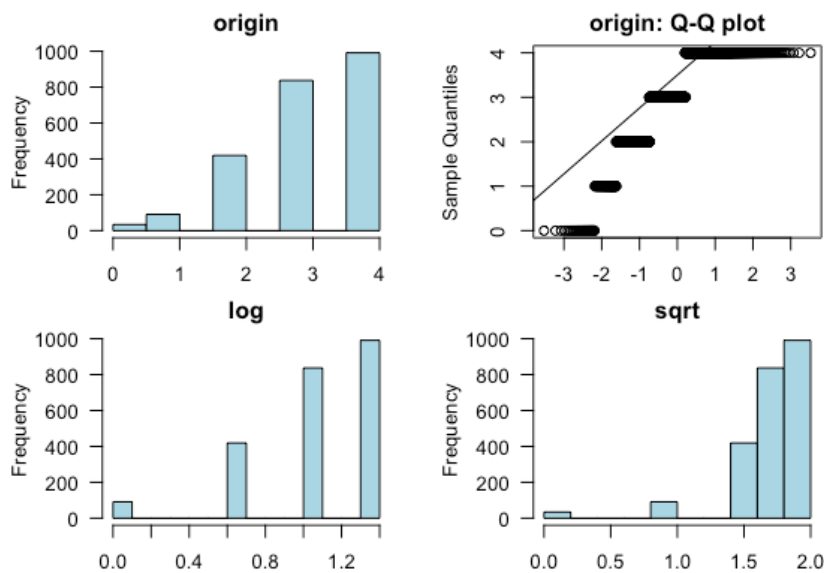

[ ALSFRS9 ]

normality test : Shapiro-Wilk normality test

statistic : 0.82716, p-value : 5.82704E-45

skewness and kurtosis

| type                | skewness   | kurtosis |
|---------------------|------------|----------|
| original            | -0.6488974 | 2.092024 |
| log transformation  | NaN        | NaN      |
| sqrt transformation | -1.4357580 | 4.142034 |

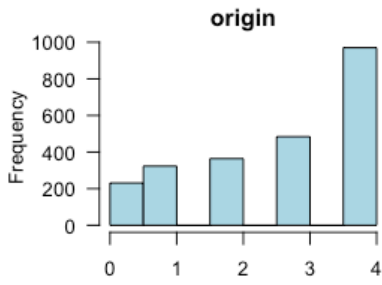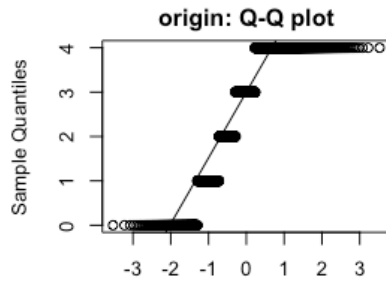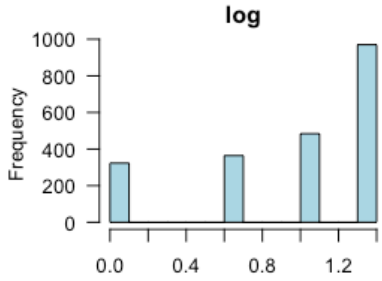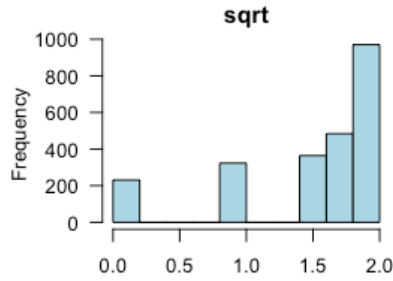

[ ALSFRS10 ]

normality test : Shapiro-Wilk normality test

statistic : 0.41113, p-value : 2.73028E-66

skewness and kurtosis

| type                | skewness  | kurtosis |
|---------------------|-----------|----------|
| original            | -3.453364 | 15.78238 |
| log transformation  | NaN       | NaN      |
| sqrt transformation | -4.947365 | 29.41125 |

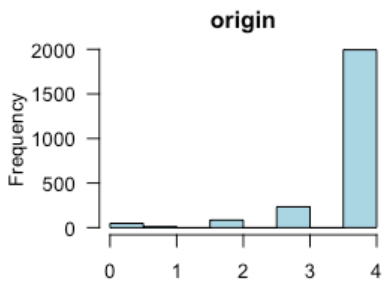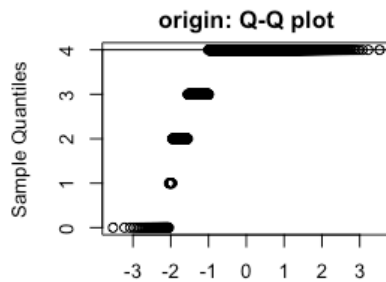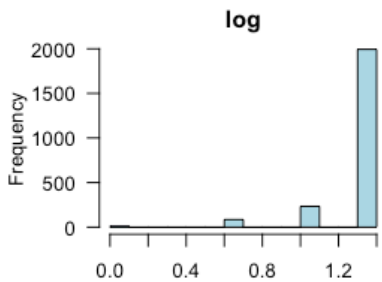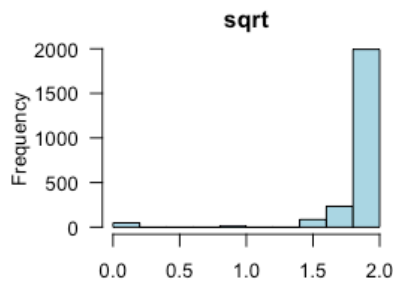



[ ALSFRS11 ]

normality test : Shapiro-Wilk normality test

statistic : 0.38354, p-value : 3.60784E-67

skewness and kurtosis

| type                | skewness  | kurtosis |
|---------------------|-----------|----------|
| original            | -3.751613 | 19.79364 |
| log transformation  | NaN       | NaN      |
| sqrt transformation | -6.195364 | 52.97576 |

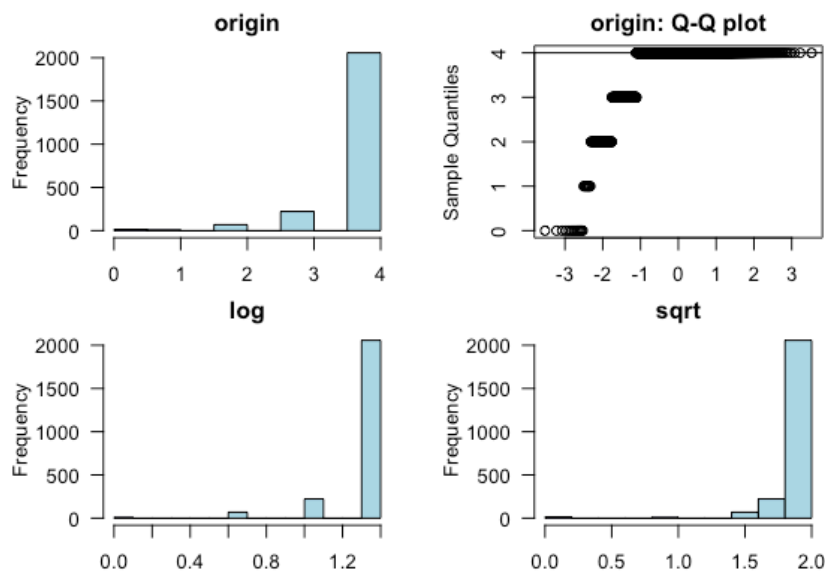

[ ALSFRS12 ]

normality test : Shapiro-Wilk normality test

statistic : 0.16376, p-value : 3.55133E-73

skewness and kurtosis

| type                | skewness  | kurtosis |
|---------------------|-----------|----------|
| original            | -6.632627 | 48.83758 |
| log transformation  | NaN       | NaN      |
| sqrt transformation | -8.010665 | 70.08808 |

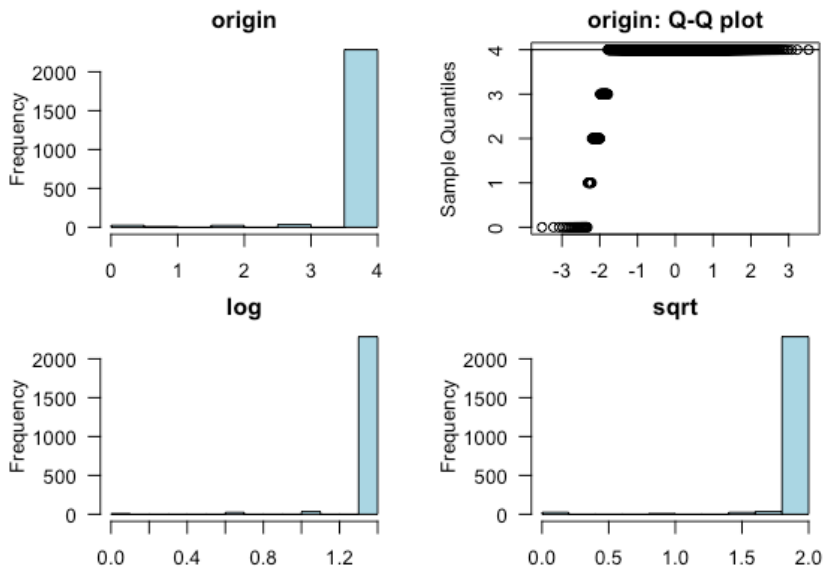

[ First ALSFRS-R total ]

normality test : Shapiro-Wilk normality test

statistic : 0.80567, p-value : 8.13619E-47

skewness and kurtosis

| type                | skewness  | kurtosis  |
|---------------------|-----------|-----------|
| original            | -1.838538 | 6.865773  |
| log transformation  | -3.286342 | 20.611139 |
| sqrt transformation | -2.349192 | 10.526823 |

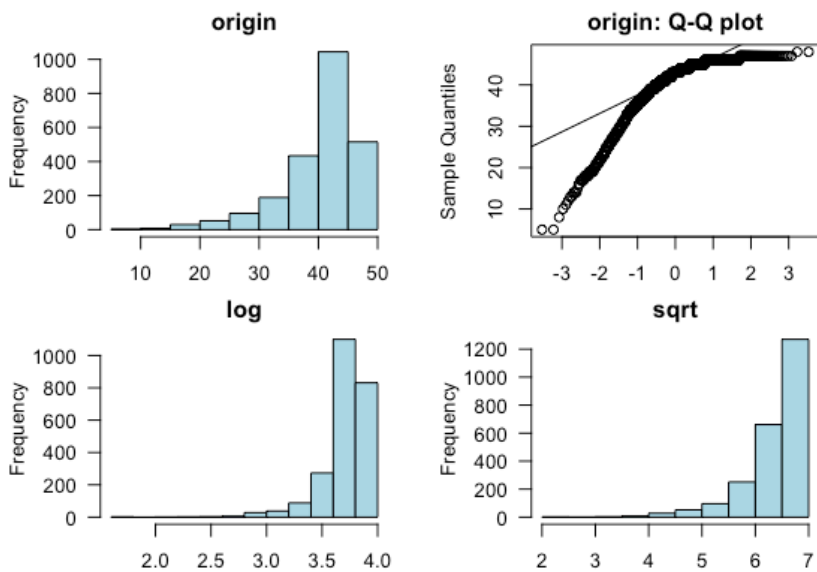

[ BMI 2 years prior to illness ]

normality test : Shapiro-Wilk normality test

statistic : 0.97062, p-value : 1.39736E-19

skewness and kurtosis

| type                | skewness  | kurtosis |
|---------------------|-----------|----------|
| original            | 0.7524503 | 4.165585 |
| log transformation  | 0.2031673 | 3.373713 |
| sqrt transformation | 0.4735973 | 3.636518 |

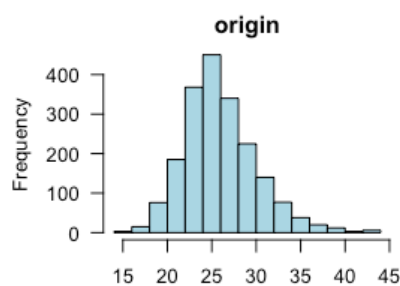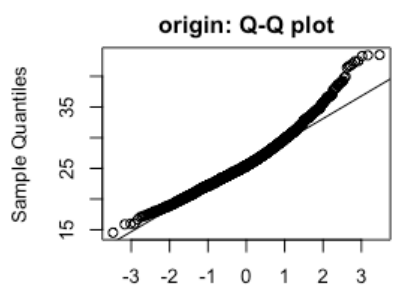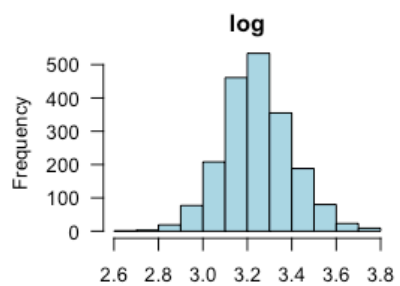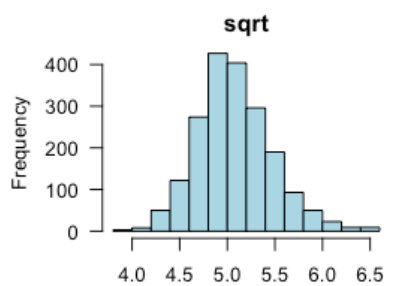

[ BMI at diagnosis ]

normality test : Shapiro-Wilk normality test

statistic : 0.97913, p-value : 1.55442E-16

skewness and kurtosis

| type                | skewness  | kurtosis |
|---------------------|-----------|----------|
| original            | 0.6233883 | 4.079254 |
| log transformation  | 0.0049483 | 3.385226 |
| sqrt transformation | 0.3091934 | 3.562802 |

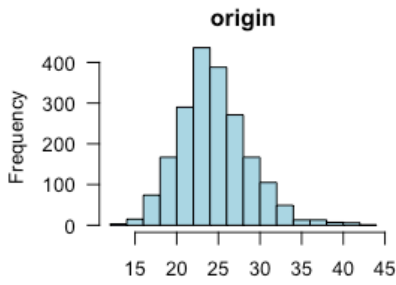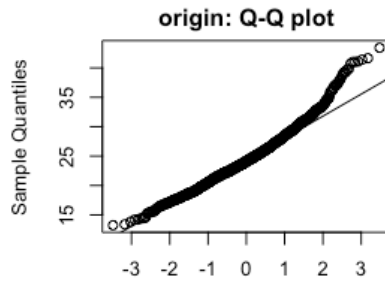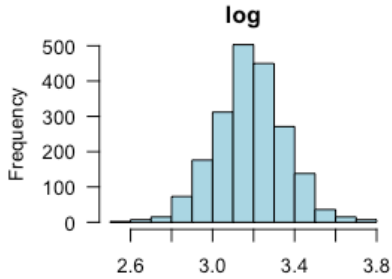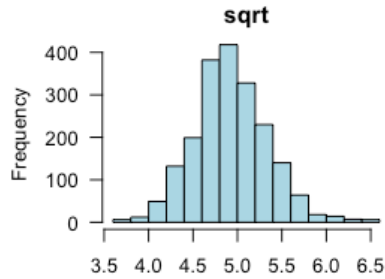

**[ Delay in diagnosis (days) ]**

normality test : Shapiro-Wilk normality test

statistic : 0.73979, p-value : 3.55768E-55

skewness and kurtosis

| type                | skewness   | kurtosis  |
|---------------------|------------|-----------|
| original            | 3.1429618  | 21.041965 |
| log transformation  | -0.1505645 | 3.298884  |
| sqrt transformation | 1.2129054  | 5.753846  |

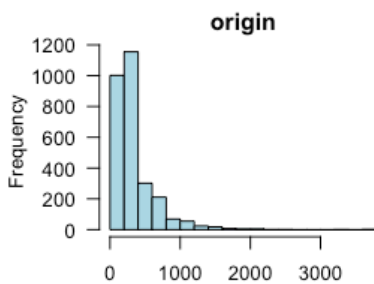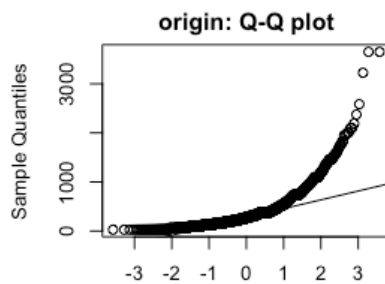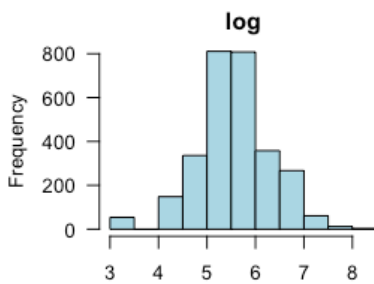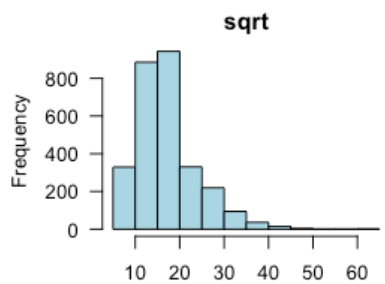

[ FVC percent at diagnosis ]

normality test : Shapiro-Wilk normality test

```
statistic : 0.98882, p-value : 4.12542E-11
```

skewness and kurtosis

| type                | skewness   | kurtosis |
|---------------------|------------|----------|
| original            | -0.2783920 | 2.848114 |
| log transformation  | -1.4014099 | 5.699046 |
| sqrt transformation | -0.7686291 | 3.521085 |

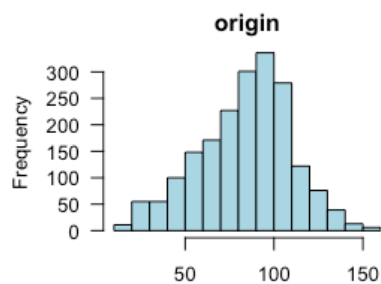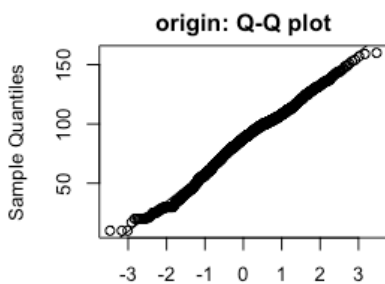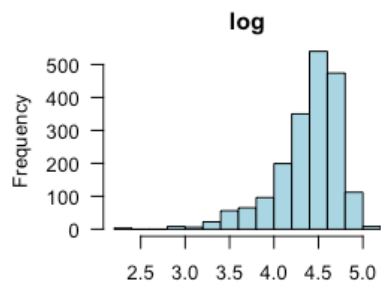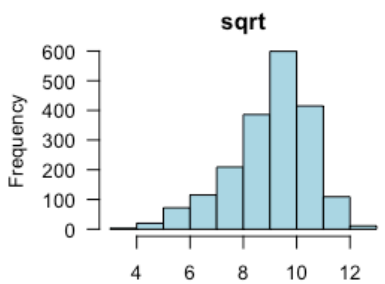

[ Height ]

normality test : Shapiro-Wilk normality test

```
statistic : 0.99702, p-value : 0.000610463
```

skewness and kurtosis

| type                | skewness   | kurtosis |
|---------------------|------------|----------|
| original            | -0.0171470 | 2.805405 |
| log transformation  | -0.1699096 | 2.838068 |
| sqrt transformation | -0.0934284 | 2.811543 |

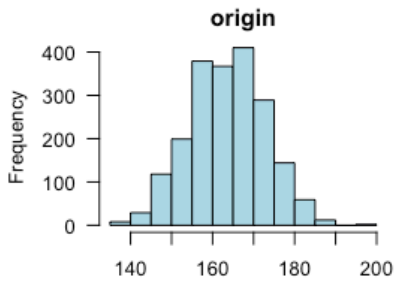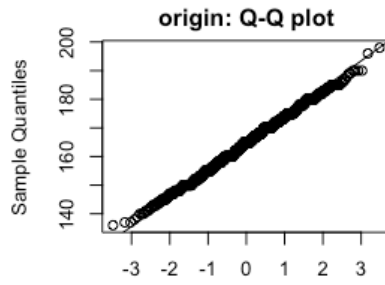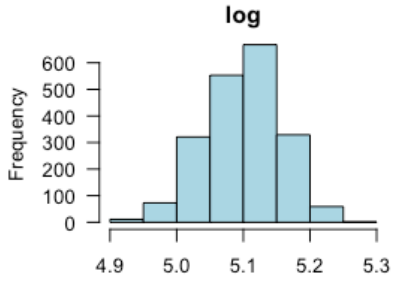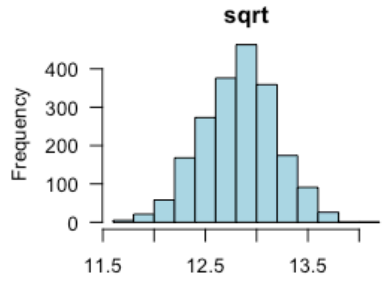

**[ Rate of decline ALSFRS-R (per month) ]**

normality test : Shapiro-Wilk normality test

statistic : 0.48661, p-value : 1.20193E-63

skewness and kurtosis

| type                | skewness | kurtosis  |
|---------------------|----------|-----------|
| original            | 9.048915 | 159.79566 |
| log transformation  | NaN      | NaN       |
| sqrt transformation | 2.151759 | 13.77023  |

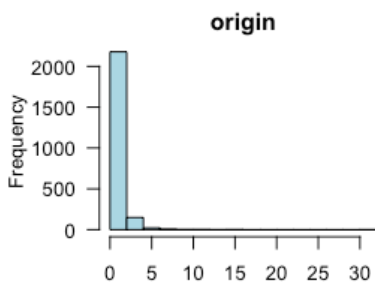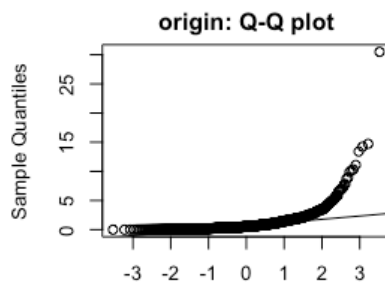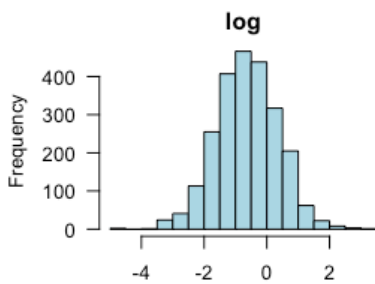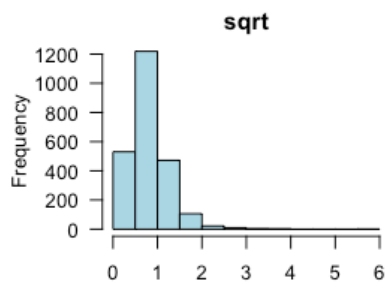

**[ Rate of decline BMI (per month) ]**

normality test : Shapiro-Wilk normality test

statistic : 0.84826, p-value : 8.53916E-40

skewness and kurtosis

| type                | skewness  | kurtosis |
|---------------------|-----------|----------|
| original            | 1.2863473 | 7.976611 |
| log transformation  | NaN       | NaN      |
| sqrt transformation | 0.4194388 | 2.404911 |

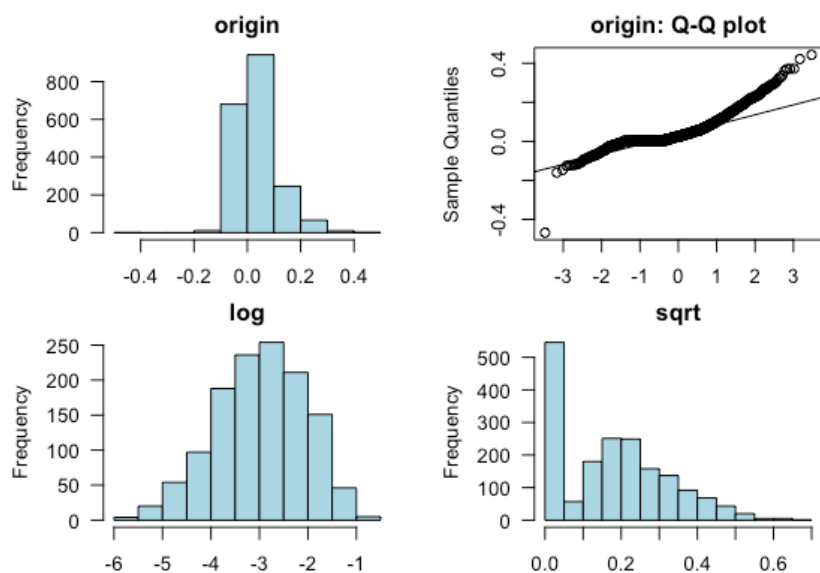

**[ Survival (days) ]**

normality test : Shapiro-Wilk normality test

statistic : 0.73311, p-value : 1.38024E-55

skewness and kurtosis

| type                | skewness  | kurtosis  |
|---------------------|-----------|-----------|
| original            | 2.5468653 | 11.028408 |
| log transformation  | 0.0426648 | 3.364052  |
| sqrt transformation | 1.3072292 | 5.106014  |

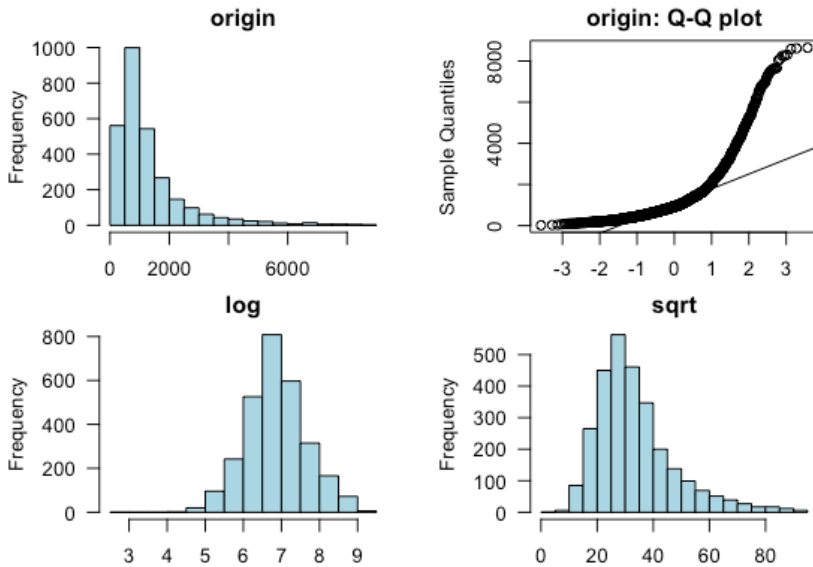

[ Time of first ALSFRS-R (days into illness) ]

normality test : Shapiro-Wilk normality test

statistic : 0.67426, p-value : 1.76102E-55

skewness and kurtosis

| type                | skewness | kurtosis  |
|---------------------|----------|-----------|
| original            | 3.749677 | 25.143865 |
| log transformation  | NaN      | NaN       |
| sqrt transformation | 1.552927 | 7.385901  |

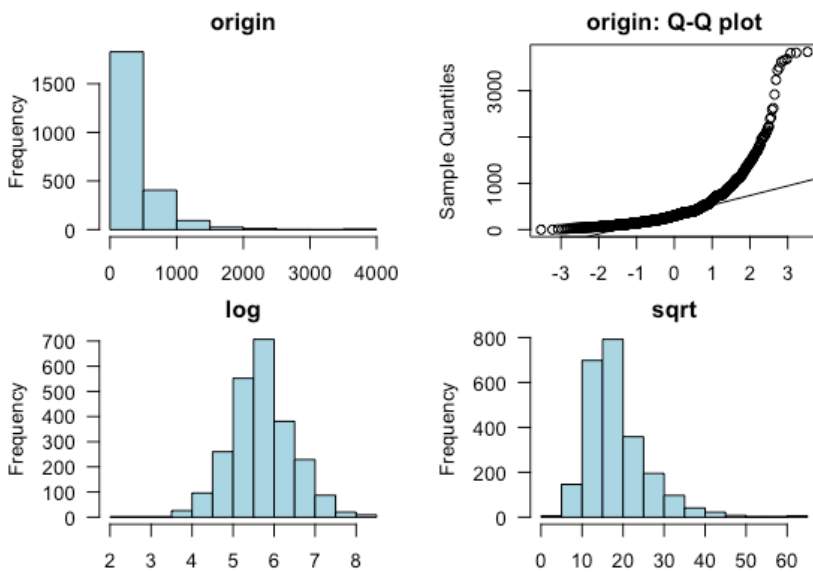



[ Time of NIPPV (days into illness) ]

normality test : Shapiro-Wilk normality test

```
statistic : 0.75086, p-value : 4.79887E-34
```

skewness and kurtosis

| type                | skewness | kurtosis  |
|---------------------|----------|-----------|
| original            | 3.132622 | 19.853501 |
| log transformation  | NaN      | NaN       |
| sqrt transformation | 1.135598 | 5.958096  |

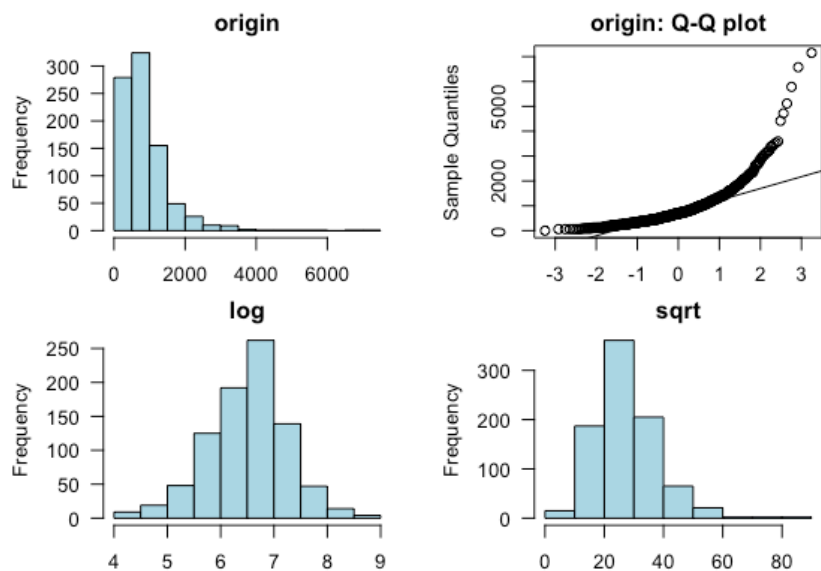

[ Time of PEG (days into illness) ]

normality test : Shapiro-Wilk normality test

```
statistic : 0.79249, p-value : 3.87343E-32
```

skewness and kurtosis

| type                | skewness   | kurtosis  |
|---------------------|------------|-----------|
| original            | 2.6914360  | 16.253751 |
| log transformation  | -0.2379703 | 3.609555  |
| sqrt transformation | 1.0384974  | 5.448605  |

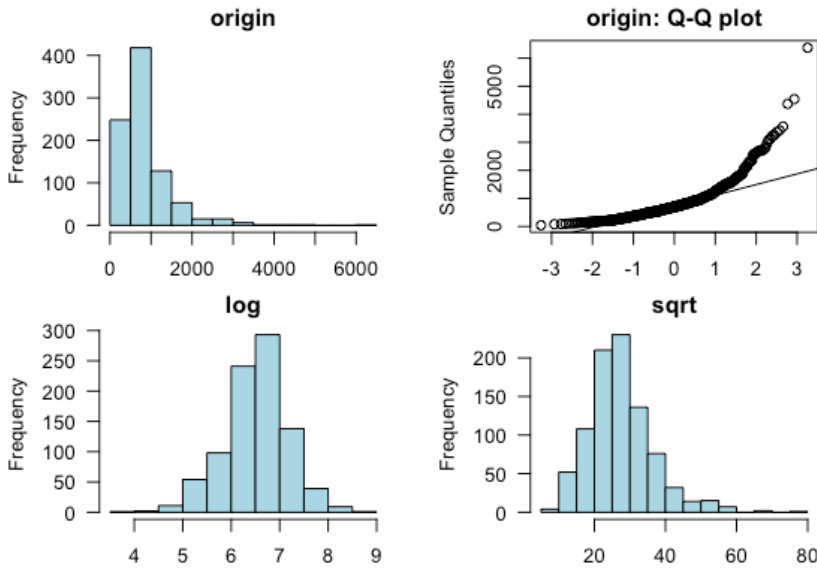

**[ Time of tracheostomy (days into illness) ]**

normality test : Shapiro-Wilk normality test

statistic : 0.88447, p-value : 6.78908E-16

skewness and kurtosis

| type                | skewness   | kurtosis |
|---------------------|------------|----------|
| original            | 1.6167809  | 7.304867 |
| log transformation  | -0.8653495 | 5.052483 |
| sqrt transformation | 0.4817271  | 3.495637 |

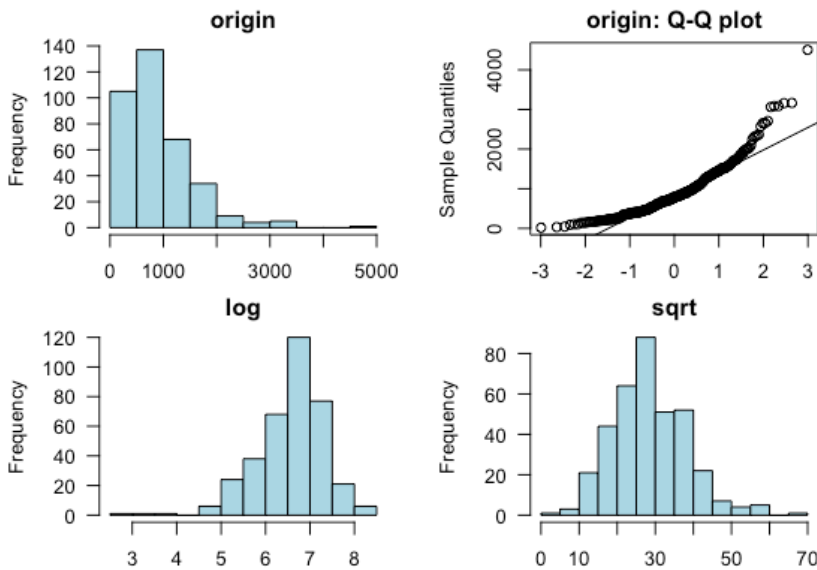

**[ Weight 2 years prior to illness ]**

normality test : Shapiro-Wilk normality test

statistic : 0.98356, p-value : 2.29724E-14

skewness and kurtosis

| type                | skewness   | kurtosis |
|---------------------|------------|----------|
| original            | 0.5196063  | 3.784897 |
| log transformation  | -0.0467443 | 3.012962 |
| sqrt transformation | 0.2260243  | 3.230385 |

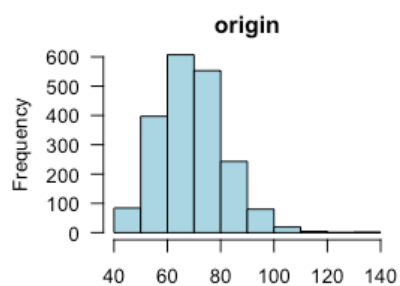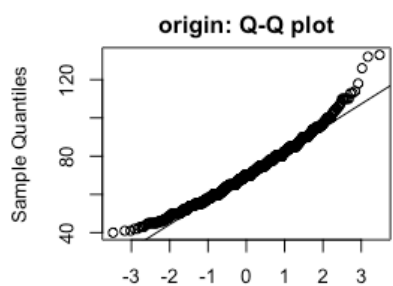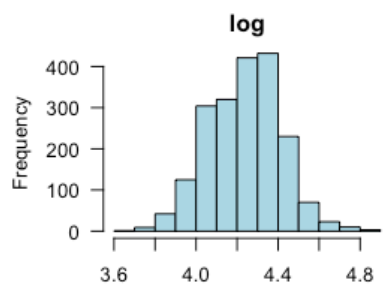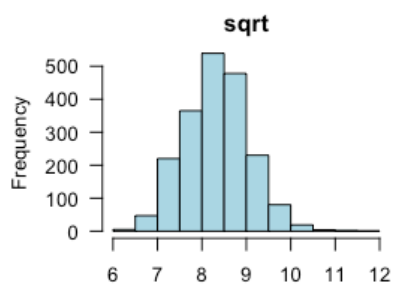

**[ Weight at diagnosis ]**

normality test : Shapiro-Wilk normality test

statistic : 0.98521, p-value : 1.00215E-13

skewness and kurtosis

| type                | skewness   | kurtosis |
|---------------------|------------|----------|
| original            | 0.5006059  | 3.657525 |
| log transformation  | -0.1020962 | 2.997880 |
| sqrt transformation | 0.1909131  | 3.136565 |

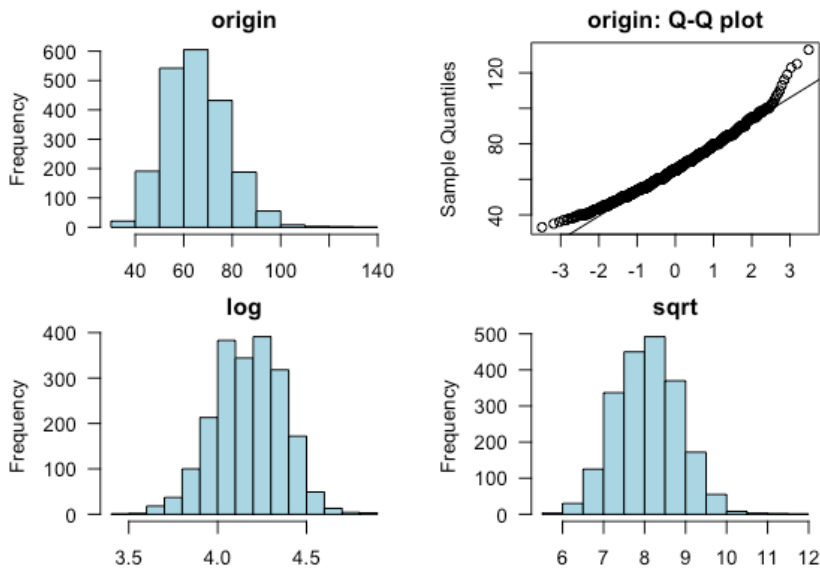

## 3 Relationship Between Variables

### 3.1 Correlation Coefficient

#### 3.1.1 Correlation Coefficient by Variable Combination

Table of correlation coefficients (0.5 or more)

| Variable1                                  | Variable2                         | Correlation Coefficient |
|--------------------------------------------|-----------------------------------|-------------------------|
| Time of tracheostomy (days into illness)   | Survival (days)                   | 0.9995719               |
| Age at symptom onset                       | Age at diagnosis                  | 0.9971255               |
| Time of tracheostomy (days into illness)   | Time of PEG (days into illness)   | 0.9202645               |
| ALSFRS9                                    | ALSFRS8                           | 0.8921703               |
| Weight at diagnosis                        | Weight 2 years prior to illness   | 0.8821688               |
| Time of tracheostomy (days into illness)   | Time of NIPPV (days into illness) | 0.8757077               |
| BMI at diagnosis                           | BMI 2 years prior to illness      | 0.8456542               |
| Time of PEG (days into illness)            | Time of NIPPV (days into illness) | 0.8326545               |
| ALSFRS11                                   | ALSFRS10                          | 0.8323421               |
| First ALSFRS-R total                       | ALSFRS7                           | 0.8261060               |
| ALSFRS5                                    | ALSFRS4                           | 0.8114505               |
| Time of NIPPV (days into illness)          | Survival (days)                   | 0.8070177               |
| Weight at diagnosis                        | BMI at diagnosis                  | 0.8052250               |
| Time of first ALSFRS-R (days into illness) | Delay in diagnosis (days)         | 0.8007616               |
| ALSFRS6                                    | ALSFRS5                           | 0.7867916               |

|                                 |                              |           |
|---------------------------------|------------------------------|-----------|
| Time of PEG (days into illness) | Survival (days)              | 0.7821316 |
| Weight 2 years prior to illness | BMI 2 years prior to illness | 0.7649205 |
| ALSFRS3                         | ALSFRS1                      | 0.7642211 |
| First ALSFRS-R total            | ALSFRS6                      | 0.7621598 |
| ALSFRS8                         | ALSFRS7                      | 0.7327403 |
| ALSFRS9                         | ALSFRS7                      | 0.7269545 |
| ALSFRS6                         | ALSFRS4                      | 0.7193552 |
| First ALSFRS-R total            | ALSFRS9                      | 0.7063663 |
| ALSFRS12                        | ALSFRS10                     | 0.7031328 |
| First ALSFRS-R total            | ALSFRS5                      | 0.7020301 |
| ALSFRS7                         | ALSFRS6                      | 0.6981110 |
| ALSFRS2                         | ALSFRS1                      | 0.6961506 |
| First ALSFRS-R total            | ALSFRS8                      | 0.6945116 |
| ALSFRS3                         | ALSFRS2                      | 0.6741214 |
| Weight 2 years prior to illness | BMI at diagnosis             | 0.6643290 |
| First ALSFRS-R total            | ALSFRS4                      | 0.6641170 |
| ALSFRS12                        | ALSFRS11                     | 0.6452054 |
| Weight at diagnosis             | BMI 2 years prior to illness | 0.6376970 |
| ALSFRS7                         | ALSFRS5                      | 0.5916423 |
| First ALSFRS-R total            | ALSFRS11                     | 0.5678575 |
| First ALSFRS-R total            | ALSFRS10                     | 0.5495165 |
| ALSFRS7                         | ALSFRS4                      | 0.5433886 |
| Weight 2 years prior to illness | Height                       | 0.5087521 |
| ALSFRS9                         | ALSFRS6                      | 0.5054623 |

### 3.1.2 Correlation Plot of Numerical Variables

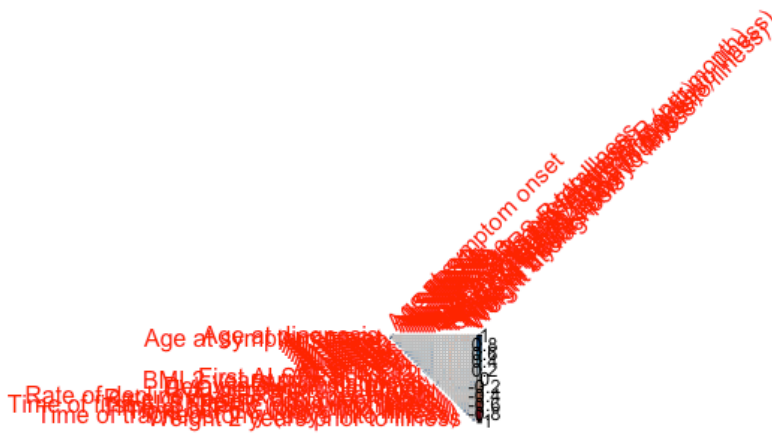

## 4 Target based Analysis

### 4.1 Grouped Descriptive Statistics

#### 4.1.1 Grouped Numerical Variables

#### 4.1.2 Grouped Categorical Variables

### 4.2 Grouped Relationship Between Variables

#### 4.2.1 Grouped Correlation Coefficient

#### 4.2.2 Grouped Correlation Plot of Numerical Variables

# Exploratory Data Analysis Report on the ERRALS Registry

Report by dlookr package

2021-07-23

- 1 Introduction
  - 1.1 Information of Dataset
  - 1.2 Information of Variables
  - 1.3 About EDA Report
- 2 Univariate Analysis
  - [2.1 Descriptive Statistics](#)
  - 2.2 Normality Test of Numerical Variables
    - 2.2.1 Statistics and Visualization of (Sample) Data
- 3 Relationship Between Variables
  - 3.1 Correlation Coefficient
    - 3.1.1 Correlation Coefficient by Variable Combination
    - 3.1.2 Correlation Plot of Numerical Variables
- 4 Target based Analysis
  - 4.1 Grouped Descriptive Statistics
    - 4.1.1 Grouped Numerical Variables
    - 4.1.2 Grouped Categorical Variables
  - 4.2 Grouped Relationship Between Variables
    - 4.2.1 Grouped Correlation Coefficient
    - 4.2.2 Grouped Correlation Plot of Numerical Variables

## 1 Introduction

The EDA Report provides exploratory data analysis information on objects that inherit `data.frame` and `data.frame`.

### 1.1 Information of Dataset

The dataset that generated the EDA Report is an **'data.frame'** object. It consists of **1,097 observations** and **66 variables**.

### 1.2 Information of Variables

The variable information of the data set that generated the EDA Report is shown in the following table.:

Information of Variables

| variables | types | missing_count | missing_percent | unique_count | unique_rate |
|-----------|-------|---------------|-----------------|--------------|-------------|
|-----------|-------|---------------|-----------------|--------------|-------------|

|                              |           |      |             |     |           |
|------------------------------|-----------|------|-------------|-----|-----------|
| Age at diagnosis             | numeric   | 2    | 0.1823154   | 459 | 0.4184139 |
| Age at symptom onset         | numeric   | 2    | 0.1823154   | 467 | 0.4257065 |
| ALSFRS1                      | integer   | 102  | 9.2980857   | 6   | 0.0054695 |
| ALSFRS2                      | integer   | 102  | 9.2980857   | 6   | 0.0054695 |
| ALSFRS3                      | integer   | 102  | 9.2980857   | 6   | 0.0054695 |
| ALSFRS4                      | integer   | 102  | 9.2980857   | 6   | 0.0054695 |
| ALSFRS5                      | integer   | 0    | 0.0000000   | 5   | 0.0045579 |
| ALSFRS6                      | integer   | 102  | 9.2980857   | 6   | 0.0054695 |
| ALSFRS7                      | integer   | 102  | 9.2980857   | 6   | 0.0054695 |
| ALSFRS8                      | integer   | 102  | 9.2980857   | 6   | 0.0054695 |
| ALSFRS9                      | integer   | 102  | 9.2980857   | 6   | 0.0054695 |
| ALSFRS10                     | integer   | 102  | 9.2980857   | 6   | 0.0054695 |
| ALSFRS11                     | integer   | 102  | 9.2980857   | 6   | 0.0054695 |
| ALSFRS12                     | integer   | 102  | 9.2980857   | 6   | 0.0054695 |
| First ALSFRS-R total         | integer   | 102  | 9.2980857   | 45  | 0.0410210 |
| Anatomical level at onset    | character | 24   | 2.1877849   | 8   | 0.0072926 |
| Ataxia                       | character | 0    | 0.0000000   | 1   | 0.0009116 |
| BMI 2 years prior to illness | numeric   | 261  | 23.7921604  | 489 | 0.4457612 |
| BMI at diagnosis             | numeric   | 199  | 18.1403829  | 560 | 0.5104831 |
| C9orf72 status               | character | 671  | 61.1668186  | 3   | 0.0027347 |
| Cancer                       | character | 0    | 0.0000000   | 2   | 0.0018232 |
| Cancer type                  | character | 976  | 88.9699180  | 42  | 0.0382862 |
| Chorea                       | character | 0    | 0.0000000   | 2   | 0.0018232 |
| Clinical type at one year    | character | 24   | 2.1877849   | 7   | 0.0063810 |
| Clinical type at onset       | logical   | 1097 | 100.0000000 | 1   | 0.0009116 |
| Cognitive impairment present | character | 0    | 0.0000000   | 2   | 0.0018232 |
| Cognitive status 1           | character | 0    | 0.0000000   | 2   | 0.0018232 |
| Cognitive status 2           | logical   | 1097 | 100.0000000 | 1   | 0.0009116 |
| COPD                         | character | 0    | 0.0000000   | 2   | 0.0018232 |
| Delay in diagnosis (days)    | integer   | 5    | 0.4557885   | 170 | 0.1549681 |
| Diabetes                     | character | 0    | 0.0000000   | 2   | 0.0018232 |
| Education                    | character | 208  | 18.9608022  | 7   | 0.0063810 |



|                                            |           |      |             |     |           |
|--------------------------------------------|-----------|------|-------------|-----|-----------|
| El Escorial category at diagnosis          | character | 55   | 5.0136737   | 5   | 0.0045579 |
| El Escorial category at visit 2            | logical   | 1097 | 100.0000000 | 1   | 0.0009116 |
| El Escorial category at visit 3            | logical   | 1097 | 100.0000000 | 1   | 0.0009116 |
| Family history of ALS                      | character | 0    | 0.0000000   | 2   | 0.0018232 |
| FVC percent at diagnosis                   | numeric   | 581  | 52.9626253  | 171 | 0.1558797 |
| Height                                     | integer   | 162  | 14.7675479  | 48  | 0.0437557 |
| Hypertension                               | character | 0    | 0.0000000   | 2   | 0.0018232 |
| Hyperthyroid                               | character | 0    | 0.0000000   | 2   | 0.0018232 |
| Hypothyroid                                | character | 0    | 0.0000000   | 2   | 0.0018232 |
| Initial diagnosis was PLS                  | character | 0    | 0.0000000   | 1   | 0.0009116 |
| Marital status                             | character | 764  | 69.6444850  | 6   | 0.0054695 |
| Mutated gene                               | character | 1051 | 95.8067457  | 5   | 0.0045579 |
| Mutation amino acid change                 | character | 1093 | 99.6353692  | 5   | 0.0045579 |
| Mutation present                           | character | 0    | 0.0000000   | 2   | 0.0018232 |
| NIPPV                                      | character | 1    | 0.0911577   | 3   | 0.0027347 |
| Onset side                                 | character | 431  | 39.2889699  | 4   | 0.0036463 |
| Parkinsonism                               | character | 0    | 0.0000000   | 2   | 0.0018232 |
| PEG inserted                               | character | 1    | 0.0911577   | 3   | 0.0027347 |
| Place of birth                             | logical   | 1097 | 100.0000000 | 1   | 0.0009116 |
| Place of residence                         | logical   | 1097 | 100.0000000 | 1   | 0.0009116 |
| Rate of decline ALSFRS-R (per month)       | numeric   | 105  | 9.5715588   | 879 | 0.8012762 |
| Rate of decline BMI (per month)            | numeric   | 272  | 24.7948952  | 472 | 0.4302644 |
| Sex                                        | character | 0    | 0.0000000   | 2   | 0.0018232 |
| Site of symptom onset                      | character | 24   | 2.1877849   | 4   | 0.0036463 |
| Smoker                                     | character | 924  | 84.2297174  | 4   | 0.0036463 |
| Survival (days)                            | integer   | 290  | 26.4357338  | 507 | 0.4621696 |
| Time of first ALSFRS-R (days into illness) | integer   | 105  | 9.5715588   | 605 | 0.5515041 |
| Time of NIPPV (days into illness)          | integer   | 847  | 77.2105743  | 231 | 0.2105743 |
| Time of PEG (days into illness)            | integer   | 873  | 79.5806746  | 207 | 0.1886964 |

|                                          |           |     |            |     |           |
|------------------------------------------|-----------|-----|------------|-----|-----------|
| Time of tracheostomy (days into illness) | integer   | 985 | 89.7903373 | 107 | 0.0975387 |
| Tracheostomy                             | character | 84  | 7.6572470  | 3   | 0.0027347 |
| Vital status                             | character | 88  | 8.0218778  | 3   | 0.0027347 |
| Weight 2 years prior to illness          | numeric   | 250 | 22.7894257 | 87  | 0.0793072 |
| Weight at diagnosis                      | numeric   | 186 | 16.9553327 | 119 | 0.1084777 |

The target variable of the data is **'Clinical type at one year'**, and the data type of the variable is **character**.

## 1.3 About EDA Report

EDA reports provide information and visualization results that support the EDA process. In particular, it provides a variety of information to understand the relationship between the target variable and the rest of the variables of interest.

## 2 Univariate Analysis

### 2.1 Descriptive Statistics

#### edaData

**66 Variables 1097 Observations**

#### Age at diagnosis

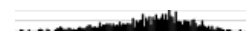

| n    | missing | distinct | Info | Mean  | Gmd   | .05   | .10   | .25   | .50   | .75   | .90   | .95   |
|------|---------|----------|------|-------|-------|-------|-------|-------|-------|-------|-------|-------|
| 1095 | 2       | 458      | 1    | 67.81 | 12.67 | 47.34 | 52.32 | 60.88 | 69.58 | 75.67 | 81.17 | 83.86 |

lowest : 28.75000 28.83333 31.16667 34.08333 34.25000 , highest: 90.00000 90.91667 91.66667 92.16667 95.08333

#### Age at symptom onset

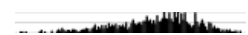

| n    | missing | distinct | Info | Mean  | Gmd   | .05   | .10   | .25   | .50   | .75   | .90   | .95   |
|------|---------|----------|------|-------|-------|-------|-------|-------|-------|-------|-------|-------|
| 1095 | 2       | 466      | 1    | 66.64 | 12.78 | 45.78 | 50.70 | 59.75 | 68.50 | 74.67 | 80.00 | 82.69 |

lowest : 27.33333 27.83333 28.91667 33.25000 33.41667 , highest: 89.58333 90.00000 90.25000 91.08333 91.16667

#### ALSFRS1

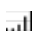

| n   | missing | distinct | Info  | Mean | Gmd   |
|-----|---------|----------|-------|------|-------|
| 995 | 102     | 5        | 0.863 | 3.13 | 1.067 |

lowest : 0 1 2 3 4 , highest: 0 1 2 3 4

| Value      | 0     | 1     | 2     | 3     | 4     |
|------------|-------|-------|-------|-------|-------|
| Frequency  | 43    | 39    | 129   | 319   | 465   |
| Proportion | 0.043 | 0.039 | 0.130 | 0.321 | 0.467 |

## ALSFRS2

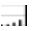

| n   | missing | distinct | Info  | Mean  | Gmd   |
|-----|---------|----------|-------|-------|-------|
| 995 | 102     | 5        | 0.646 | 3.534 | 0.725 |

lowest : 0 1 2 3 4 , highest: 0 1 2 3 4

|            |       |       |       |       |       |
|------------|-------|-------|-------|-------|-------|
| Value      | 0     | 1     | 2     | 3     | 4     |
| Frequency  | 11    | 26    | 84    | 174   | 700   |
| Proportion | 0.011 | 0.026 | 0.084 | 0.175 | 0.704 |

## ALSFRS3

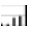

| n   | missing | distinct | Info  | Mean  | Gmd   |
|-----|---------|----------|-------|-------|-------|
| 995 | 102     | 5        | 0.837 | 3.187 | 1.045 |

lowest : 0 1 2 3 4 , highest: 0 1 2 3 4

|            |       |       |       |       |       |
|------------|-------|-------|-------|-------|-------|
| Value      | 0     | 1     | 2     | 3     | 4     |
| Frequency  | 32    | 27    | 186   | 228   | 522   |
| Proportion | 0.032 | 0.027 | 0.187 | 0.229 | 0.525 |

## ALSFRS4

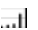

| n   | missing | distinct | Info  | Mean  | Gmd    |
|-----|---------|----------|-------|-------|--------|
| 995 | 102     | 5        | 0.838 | 3.222 | 0.9834 |

lowest : 0 1 2 3 4 , highest: 0 1 2 3 4

|            |       |       |       |       |       |
|------------|-------|-------|-------|-------|-------|
| Value      | 0     | 1     | 2     | 3     | 4     |
| Frequency  | 27    | 56    | 82    | 334   | 496   |
| Proportion | 0.027 | 0.056 | 0.082 | 0.336 | 0.498 |

## ALSFRS5

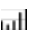

| n    | missing | distinct | Info  | Mean  | Gmd   |
|------|---------|----------|-------|-------|-------|
| 1097 | 0       | 5        | 0.926 | 2.641 | 1.499 |

lowest : 0 1 2 3 4 , highest: 0 1 2 3 4

|            |       |       |       |       |       |
|------------|-------|-------|-------|-------|-------|
| Value      | 0     | 1     | 2     | 3     | 4     |
| Frequency  | 152   | 86    | 157   | 311   | 391   |
| Proportion | 0.139 | 0.078 | 0.143 | 0.284 | 0.356 |

## ALSFRS6

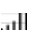

| n   | missing | distinct | Info  | Mean  | Gmd   |
|-----|---------|----------|-------|-------|-------|
| 995 | 102     | 5        | 0.925 | 2.733 | 1.298 |

lowest : 0 1 2 3 4 , highest: 0 1 2 3 4

|            |       |       |       |       |       |
|------------|-------|-------|-------|-------|-------|
| Value      | 0     | 1     | 2     | 3     | 4     |
| Frequency  | 59    | 117   | 176   | 322   | 321   |
| Proportion | 0.059 | 0.118 | 0.177 | 0.324 | 0.323 |

### ALSFRS7

| n   | missing | distinct | Info  | Mean  | Gmd   |
|-----|---------|----------|-------|-------|-------|
| 995 | 102     | 5        | 0.802 | 3.246 | 1.041 |

lowest : 0 1 2 3 4 , highest: 0 1 2 3 4

|            |       |       |       |       |       |
|------------|-------|-------|-------|-------|-------|
| Value      | 0     | 1     | 2     | 3     | 4     |
| Frequency  | 39    | 47    | 110   | 233   | 566   |
| Proportion | 0.039 | 0.047 | 0.111 | 0.234 | 0.569 |

### ALSFRS8

| n   | missing | distinct | Info  | Mean  | Gmd   |
|-----|---------|----------|-------|-------|-------|
| 995 | 102     | 5        | 0.912 | 2.862 | 1.139 |

lowest : 0 1 2 3 4 , highest: 0 1 2 3 4

|            |       |       |       |       |       |
|------------|-------|-------|-------|-------|-------|
| Value      | 0     | 1     | 2     | 3     | 4     |
| Frequency  | 32    | 54    | 279   | 284   | 346   |
| Proportion | 0.032 | 0.054 | 0.280 | 0.285 | 0.348 |

### ALSFRS9

| n   | missing | distinct | Info  | Mean | Gmd   |
|-----|---------|----------|-------|------|-------|
| 995 | 102     | 5        | 0.943 | 2.28 | 1.667 |

lowest : 0 1 2 3 4 , highest: 0 1 2 3 4

|            |       |       |       |       |       |
|------------|-------|-------|-------|-------|-------|
| Value      | 0     | 1     | 2     | 3     | 4     |
| Frequency  | 156   | 236   | 80    | 219   | 304   |
| Proportion | 0.157 | 0.237 | 0.080 | 0.220 | 0.306 |

### ALSFRS10

| n   | missing | distinct | Info  | Mean  | Gmd    |
|-----|---------|----------|-------|-------|--------|
| 995 | 102     | 5        | 0.575 | 3.572 | 0.7035 |

lowest : 0 1 2 3 4 , highest: 0 1 2 3 4

|            |       |       |       |       |       |
|------------|-------|-------|-------|-------|-------|
| Value      | 0     | 1     | 2     | 3     | 4     |
| Frequency  | 14    | 52    | 31    | 152   | 746   |
| Proportion | 0.014 | 0.052 | 0.031 | 0.153 | 0.750 |

### ALSFRS11

| n   | missing | distinct | Info  | Mean  | Gmd    |
|-----|---------|----------|-------|-------|--------|
| 995 | 102     | 5        | 0.429 | 3.727 | 0.4773 |

lowest : 0 1 2 3 4 , highest: 0 1 2 3 4

|            |       |       |       |       |       |
|------------|-------|-------|-------|-------|-------|
| Value      | 0     | 1     | 2     | 3     | 4     |
| Frequency  | 9     | 12    | 51    | 98    | 825   |
| Proportion | 0.009 | 0.012 | 0.051 | 0.098 | 0.829 |

### ALSFRS12

| n   | missing | distinct | Info  | Mean  | Gmd    |
|-----|---------|----------|-------|-------|--------|
| 995 | 102     | 5        | 0.207 | 3.848 | 0.2878 |

lowest : 0 1 2 3 4 , highest: 0 1 2 3 4

|            |       |       |       |       |       |
|------------|-------|-------|-------|-------|-------|
| Value      | 0     | 1     | 2     | 3     | 4     |
| Frequency  | 14    | 6     | 23    | 31    | 921   |
| Proportion | 0.014 | 0.006 | 0.023 | 0.031 | 0.926 |

### First ALSFRS-R total

| n   | missing | distinct | Info  | Mean  | Gmd  | .05 | .10 | .25 | .50 | .75 | .90 | .95 |
|-----|---------|----------|-------|-------|------|-----|-----|-----|-----|-----|-----|-----|
| 995 | 102     | 44       | 0.997 | 38.25 | 8.11 | 23  | 28  | 35  | 40  | 44  | 46  | 46  |

lowest : 1 2 3 6 8 , highest: 44 45 46 47 48

### Anatomical level at onset

| n    | missing | distinct |
|------|---------|----------|
| 1073 | 24      | 7        |

|          |                    |             |                    |                    |                      |
|----------|--------------------|-------------|--------------------|--------------------|----------------------|
| lowest : | bulbar             | lower_limbs | lower_limbs_distal | respiratory        | upper_limbs          |
| highest: | lower_limbs_distal | respiratory | upper_limbs        | upper_limbs_distal | upper_limbs_proximal |

|            |             |             |                    |
|------------|-------------|-------------|--------------------|
| Value      | bulbar      | lower_limbs | lower_limbs_distal |
| Frequency  | 376         | 77          | 270                |
| Proportion | 0.350       | 0.072       | 0.252              |
| Value      | respiratory | upper_limbs | upper_limbs_distal |

|            |                      |       |       |
|------------|----------------------|-------|-------|
| Frequency  | 23                   | 66    | 196   |
| Proportion | 0.021                | 0.062 | 0.183 |
| Value      | upper_limbs_proximal |       |       |
| Frequency  | 65                   |       |       |
| Proportion | 0.061                |       |       |

## Ataxia

| n    | missing | distinct | value |
|------|---------|----------|-------|
| 1097 | 0       | 1        | no    |

|            |      |
|------------|------|
| Value      | no   |
| Frequency  | 1097 |
| Proportion | 1    |

## BMI 2 years prior to illness

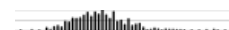

| n   | missing | distinct | Info | Mean  | Gmd   | .05   | .10   | .25   | .50   | .75   | .90   | .95   |
|-----|---------|----------|------|-------|-------|-------|-------|-------|-------|-------|-------|-------|
| 836 | 261     | 488      | 1    | 25.83 | 4.161 | 20.31 | 21.43 | 23.34 | 25.43 | 27.74 | 30.47 | 32.15 |

lowest : 15.04748 16.38470 16.43655 17.36044 18.35938 , highest: 41.14286 41.52249 42.32413 43.28255 44.08163

## BMI at diagnosis

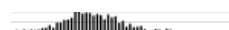

| n   | missing | distinct | Info | Mean  | Gmd   | .05   | .10   | .25   | .50   | .75   | .90   | .95   |
|-----|---------|----------|------|-------|-------|-------|-------|-------|-------|-------|-------|-------|
| 898 | 199     | 559      | 1    | 24.44 | 4.348 | 18.38 | 19.88 | 21.89 | 24.22 | 26.84 | 29.32 | 31.05 |

lowest : 13.77778 13.95776 14.17234 14.66667 14.69238 , highest: 40.56247 40.90066 42.32413 43.28255 44.08163

## C9orf72 status

| n   | missing | distinct |
|-----|---------|----------|
| 426 | 671     | 2        |

|            |       |       |
|------------|-------|-------|
| Value      | EXP   | WT    |
| Frequency  | 22    | 404   |
| Proportion | 0.052 | 0.948 |

## Cancer

| n    | missing | distinct |
|------|---------|----------|
| 1097 | 0       | 2        |

|            |       |       |
|------------|-------|-------|
| Value      | no    | yes   |
| Frequency  | 975   | 122   |
| Proportion | 0.889 | 0.111 |

## Cancer type

| n        | missing            |         |                |                       |                    | distinct |
|----------|--------------------|---------|----------------|-----------------------|--------------------|----------|
| 121      | 976                |         |                |                       |                    | 41       |
| lowest : | acoustic_neurinoma | adrenal | adrenal;breast | adrenal;ovary;thyroid | bile_duct;melanoma |          |
| highest: | skin_cancer        | stomach | thymoma        | thyroid               | uterus             |          |

## Chorea

| n    | missing |  | distinct |
|------|---------|--|----------|
| 1097 | 0       |  | 2        |

| Value      | no    | yes   |
|------------|-------|-------|
| Frequency  | 1095  | 2     |
| Proportion | 0.998 | 0.002 |

## Clinical type at one year

| n        | missing   |           |          |           |             |             | distinct |
|----------|-----------|-----------|----------|-----------|-------------|-------------|----------|
| 1073     | 24        |           |          |           |             |             | 6        |
| lowest : | bulbar    | classical | flailArm | flailLeg  | pyramidal   | respiratory |          |
| highest: | classical | flailArm  | flailLeg | pyramidal | respiratory |             |          |

| Value      | bulbar | classical | flailArm | flailLeg | pyramidal | respiratory |
|------------|--------|-----------|----------|----------|-----------|-------------|
| Frequency  | 376    | 462       | 52       | 109      | 50        | 24          |
| Proportion | 0.350  | 0.431     | 0.048    | 0.102    | 0.047     | 0.022       |

## Cognitive impairment present

| n    | missing |  | distinct |
|------|---------|--|----------|
| 1097 | 0       |  | 2        |

| Value      | no    | yes   |
|------------|-------|-------|
| Frequency  | 1000  | 97    |
| Proportion | 0.912 | 0.088 |

## Cognitive status 1

| n | missing |  | distinct |
|---|---------|--|----------|
|---|---------|--|----------|

1097

0

2

|            |            |       |
|------------|------------|-------|
| Value      | FTD normal |       |
| Frequency  | 97         | 1000  |
| Proportion | 0.088      | 0.912 |

**COPD**

| n    | missing | distinct |
|------|---------|----------|
| 1097 | 0       | 2        |

|            |       |       |
|------------|-------|-------|
| Value      | no    | yes   |
| Frequency  | 1000  | 97    |
| Proportion | 0.912 | 0.088 |

**Delay in diagnosis (days)**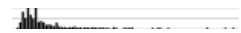

| n    | missing | distinct | Info  | Mean  | Gmd   | .05  | .10   | .25   | .50   | .75   | .90   | .95    |
|------|---------|----------|-------|-------|-------|------|-------|-------|-------|-------|-------|--------|
| 1092 | 5       | 169      | 0.999 | 423.5 | 371.7 | 90.0 | 120.0 | 182.0 | 305.0 | 486.2 | 820.9 | 1201.5 |

lowest : 0 28 30 31 59 , highest: 2739 2891 3652 4018 4171

**Diabetes**

| n    | missing | distinct |
|------|---------|----------|
| 1097 | 0       | 2        |

|            |       |       |
|------------|-------|-------|
| Value      | no    | yes   |
| Frequency  | 1012  | 85    |
| Proportion | 0.923 | 0.077 |

**Education**

.t.tl.

| n   | missing | distinct |
|-----|---------|----------|
| 889 | 208     | 6        |

|          |         |         |         |        |                |
|----------|---------|---------|---------|--------|----------------|
| lowest : | 11years | 13years | 18years | 5years | 8years         |
| highest: | 13years | 18years | 5years  | 8years | lessthan5years |

|            |         |         |         |        |
|------------|---------|---------|---------|--------|
| Value      | 11years | 13years | 18years | 5years |
| Frequency  | 28      | 223     | 51      | 280    |
| Proportion | 0.031   | 0.251   | 0.057   | 0.315  |

|            |        |                |
|------------|--------|----------------|
| Value      | 8years | lessthan5years |
| Frequency  | 260    | 47             |
| Proportion | 0.292  | 0.053          |



## El Escorial category at diagnosis

llh

| n    | missing | distinct |
|------|---------|----------|
| 1042 | 55      | 4        |

|            |                       |          |          |
|------------|-----------------------|----------|----------|
| Value      | definite              | possible | probable |
| Frequency  | 336                   | 222      | 345      |
| Proportion | 0.322                 | 0.213    | 0.331    |
| Value      | probable_labSupported |          |          |
| Frequency  | 139                   |          |          |
| Proportion | 0.133                 |          |          |

## Family history of ALS

| n    | missing | distinct |
|------|---------|----------|
| 1097 | 0       | 2        |

|            |       |       |
|------------|-------|-------|
| Value      | no    | yes   |
| Frequency  | 1046  | 51    |
| Proportion | 0.954 | 0.046 |

## FVC percent at diagnosis

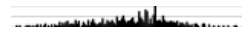

| n   | missing | distinct | Info | Mean  | Gmd   | .05   | .10   | .25   | .50   | .75    | .90    | .95    |
|-----|---------|----------|------|-------|-------|-------|-------|-------|-------|--------|--------|--------|
| 516 | 581     | 170      | 1    | 84.51 | 27.97 | 40.00 | 48.00 | 69.00 | 89.05 | 100.25 | 113.00 | 120.25 |

lowest : 13.0 15.0 19.0 20.0 21.0 , highest: 139.9 143.0 146.0 150.0 151.0

## Height

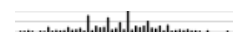

| n   | missing | distinct | Info  | Mean  | Gmd   | .05 | .10 | .25 | .50 | .75 | .90 | .95 |
|-----|---------|----------|-------|-------|-------|-----|-----|-----|-----|-----|-----|-----|
| 935 | 162     | 47       | 0.995 | 167.9 | 9.869 | 152 | 157 | 162 | 168 | 174 | 179 | 182 |

lowest : 143 144 145 146 148 , highest: 186 187 188 190 195

## Hypertension

| n    | missing | distinct |
|------|---------|----------|
| 1097 | 0       | 2        |

|            |       |       |
|------------|-------|-------|
| Value      | no    | yes   |
| Frequency  | 624   | 473   |
| Proportion | 0.569 | 0.431 |

## Hyperthyroid

| n    | missing | distinct |
|------|---------|----------|
| 1097 | 0       | 2        |

```
Value      no  yes
Frequency 1078 19
Proportion 0.983 0.017
```

## Hypothyroid

| n    | missing | distinct |
|------|---------|----------|
| 1097 | 0       | 2        |

```
Value      no  yes
Frequency 1041 56
Proportion 0.949 0.051
```

## Initial diagnosis was PLS

| n    | missing | distinct | value |
|------|---------|----------|-------|
| 1097 | 0       | 1        | no    |

```
Value      no
Frequency 1097
Proportion 1
```

## Marital status

| n   | missing | distinct |
|-----|---------|----------|
| 333 | 764     | 5        |

```
lowest:  divorced  married  neverMarried  separated  widowed
highest: divorced  married  neverMarried  separated  widowed
```

```
Value      divorced  married  neverMarried  separated  widowed
Frequency      10      246      25      3      49
Proportion  0.030  0.739  0.075  0.009  0.147
```

## Mutated gene

| n  | missing | distinct |
|----|---------|----------|
| 46 | 1051    | 4        |

|            |         |       |       |        |
|------------|---------|-------|-------|--------|
| Value      | C90RF72 | FUS   | SOD1  | TARDBP |
| Frequency  | 22      | 7     | 14    | 3      |
| Proportion | 0.478   | 0.152 | 0.304 | 0.065  |

## Mutation amino acid change

| n | missing | distinct |
|---|---------|----------|
| 4 | 1093    | 4        |

|            |       |      |      |       |
|------------|-------|------|------|-------|
| Value      | G357D | G94D | N66T | S134N |
| Frequency  | 1     | 1    | 1    | 1     |
| Proportion | 0.25  | 0.25 | 0.25 | 0.25  |

## Mutation present

| n    | missing | distinct |
|------|---------|----------|
| 1097 | 0       | 2        |

|            |       |       |
|------------|-------|-------|
| Value      | no    | yes   |
| Frequency  | 1051  | 46    |
| Proportion | 0.958 | 0.042 |

## NIPPV

| n    | missing | distinct |
|------|---------|----------|
| 1096 | 1       | 2        |

|            |      |      |
|------------|------|------|
| Value      | no   | yes  |
| Frequency  | 833  | 263  |
| Proportion | 0.76 | 0.24 |

## Onset side

| n   | missing | distinct |
|-----|---------|----------|
| 666 | 431     | 3        |

|            |       |       |       |
|------------|-------|-------|-------|
| Value      | both  | left  | right |
| Frequency  | 52    | 407   | 207   |
| Proportion | 0.078 | 0.611 | 0.311 |

## Parkinsonism

| n    | missing | distinct |
|------|---------|----------|
| 1097 | 0       | 2        |

```

Value      no  yes
Frequency 1067 30
Proportion 0.973 0.027

```

### PEG inserted

| n    | missing | distinct |
|------|---------|----------|
| 1096 | 1       | 2        |

```

Value      no  yes
Frequency  863 233
Proportion 0.787 0.213

```

### Rate of decline ALSFRS-R (per month)

| n       | missing | distinct | Info    | Mean   | Gmd    | .05     | .10     | .25     |
|---------|---------|----------|---------|--------|--------|---------|---------|---------|
| 992     | 105     | 878      | 1       | 0.9751 | 0.9964 | 0.08816 | 0.15115 | 0.32014 |
| .50     | .75     | .90      | .95     |        |        |         |         |         |
| 0.60411 | 1.20874 | 2.04522  | 2.71668 |        |        |         |         |         |

|          |            |            |             |             |             |
|----------|------------|------------|-------------|-------------|-------------|
| lowest:  | 0.00000000 | 0.02934103 | 0.03588235  | 0.03836478  | 0.03880407  |
| highest: | 6.25641026 | 6.82236842 | 10.16666667 | 17.42857143 | 30.50000000 |

```

Value      0.0  0.5  1.0  1.5  2.0  2.5  3.0  3.5  4.0  4.5  5.0  5.5
Frequency  200  365  195  90  59  36  12  6  10  7  6  1
Proportion 0.202 0.368 0.197 0.091 0.059 0.036 0.012 0.006 0.010 0.007 0.006 0.001

```

```

Value      6.5  7.0  10.0  17.5  30.5
Frequency  1  1  1  1  1
Proportion 0.001 0.001 0.001 0.001 0.001

```

For the frequency table, variable is rounded to the nearest 0.5

### Rate of decline BMI (per month)

| n       | missing | distinct | Info    | Mean    | Gmd     | .05     | .10     | .25     |
|---------|---------|----------|---------|---------|---------|---------|---------|---------|
| 825     | 272     | 471      | 0.926   | 0.03973 | 0.06109 | 0.00000 | 0.00000 | 0.00000 |
| .50     | .75     | .90      | .95     |         |         |         |         |         |
| 0.01354 | 0.06510 | 0.12226  | 0.16470 |         |         |         |         |         |

|          |            |            |            |            |            |
|----------|------------|------------|------------|------------|------------|
| lowest:  | -0.2025815 | -0.1136962 | -0.1078196 | -0.1004388 | -0.0984190 |
| highest: | 0.2797582  | 0.3063702  | 0.3258176  | 0.3364091  | 0.3671486  |

## Sex

| n    | missing | distinct |
|------|---------|----------|
| 1097 | 0       | 2        |

  

| Value      | F     | M     |
|------------|-------|-------|
| Frequency  | 485   | 612   |
| Proportion | 0.442 | 0.558 |

## Site of symptom onset

| n    | missing | distinct |
|------|---------|----------|
| 1073 | 24      | 3        |

  

| Value      | bulbar | respiratory | spinal |
|------------|--------|-------------|--------|
| Frequency  | 376    | 23          | 674    |
| Proportion | 0.350  | 0.021       | 0.628  |

## Smoker

| n   | missing | distinct |
|-----|---------|----------|
| 173 | 924     | 3        |

  

| Value      | current | former | never |
|------------|---------|--------|-------|
| Frequency  | 92      | 20     | 61    |
| Proportion | 0.532   | 0.116  | 0.353 |

## Survival (days)

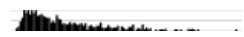

| n   | missing | distinct | Info | Mean | Gmd  | .05   | .10   | .25   | .50   | .75    | .90    | .95    |
|-----|---------|----------|------|------|------|-------|-------|-------|-------|--------|--------|--------|
| 807 | 290     | 506      | 1    | 1272 | 1022 | 273.0 | 332.6 | 548.0 | 958.0 | 1742.5 | 2721.4 | 3246.6 |

lowest : 121 152 165 178 183 , highest: 4688 4699 4747 4839 5843

## Time of first ALSFRS-R (days into illness)

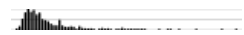

| n   | missing | distinct | Info | Mean  | Gmd   | .05   | .10   | .25   | .50   | .75   | .90   | .95    |
|-----|---------|----------|------|-------|-------|-------|-------|-------|-------|-------|-------|--------|
| 992 | 105     | 604      | 1    | 484.1 | 396.1 | 108.6 | 146.0 | 220.0 | 366.0 | 590.5 | 944.0 | 1271.5 |

lowest : 8 18 25 31 35 , highest: 2706 2869 3174 3606 3846

## Time of NIPPV (days into illness)

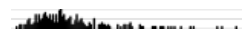

| n   | missing | distinct | Info | Mean | Gmd   | .05   | .10   | .25   | .50   | .75   | .90    | .95    |
|-----|---------|----------|------|------|-------|-------|-------|-------|-------|-------|--------|--------|
| 250 | 847     | 230      | 1    | 733  | 506.9 | 188.4 | 270.7 | 404.5 | 608.0 | 878.2 | 1429.5 | 1793.0 |

lowest : 44 90 102 104 143 , highest: 2234 2272 2571 2641 2814

### Time of PEG (days into illness)

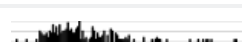

| n   | missing | distinct | Info | Mean  | Gmd   | .05   | .10   | .25   | .50   | .75   | .90    | .95    |
|-----|---------|----------|------|-------|-------|-------|-------|-------|-------|-------|--------|--------|
| 224 | 873     | 206      | 1    | 738.3 | 469.8 | 229.6 | 299.3 | 434.5 | 636.0 | 957.8 | 1234.5 | 1628.1 |

lowest : -76 45 161 193 195 , highest: 2217 2234 2277 2560 2571

### Time of tracheostomy (days into illness)

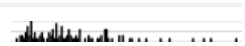

| n   | missing | distinct | Info | Mean  | Gmd   | .05   | .10   | .25   | .50   | .75    | .90    | .95    |
|-----|---------|----------|------|-------|-------|-------|-------|-------|-------|--------|--------|--------|
| 112 | 985     | 106      | 1    | 764.1 | 507.5 | 250.9 | 273.5 | 402.5 | 659.0 | 1015.5 | 1329.7 | 1670.2 |

lowest : 165 196 203 211 213 , highest: 1859 2116 2239 2321 2593

### Tracheostomy

| n    | missing | distinct |
|------|---------|----------|
| 1013 | 84      | 2        |

```

Value      no  yes
Frequency  714 299
Proportion 0.705 0.295
    
```

### Vital status

| n    | missing | distinct |
|------|---------|----------|
| 1009 | 88      | 2        |

```

Value      alive  dead
Frequency  346  663
Proportion 0.343 0.657
    
```

### Weight 2 years prior to illness

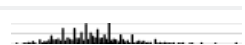

| n   | missing | distinct | Info  | Mean  | Gmd   | .05  | .10  | .25  | .50  | .75  | .90  | .95  |
|-----|---------|----------|-------|-------|-------|------|------|------|------|------|------|------|
| 847 | 250     | 86       | 0.999 | 73.03 | 14.84 | 54.0 | 56.0 | 64.0 | 72.0 | 80.0 | 90.0 | 96.7 |

lowest : 40 43 44 45 46 , highest: 115 116 120 126 135

### Weight at diagnosis

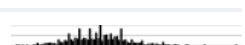

| n   | missing | distinct | Info  | Mean  | Gmd   | .05  | .10  | .25  | .50  | .75  | .90  | .95  |
|-----|---------|----------|-------|-------|-------|------|------|------|------|------|------|------|
| 911 | 186     | 118      | 0.999 | 69.11 | 14.97 | 48.0 | 53.0 | 60.0 | 69.0 | 78.0 | 85.0 | 91.5 |

lowest : 30 31 33 35 38 , highest: 107 111 112 120 135

Variables with all observations missing:

Clinical type at onset, Cognitive status 2, El Escorial category at visit 2, El Escorial category at visit 3, Place of birth, Place of residence

## 2.2 Normality Test of Numerical Variables

### 2.2.1 Statistics and Visualization of (Sample) Data

#### [ Age at diagnosis ]

normality test : Shapiro-Wilk normality test

statistic : 0.97687, p-value : 3.27035E-12

skewness and kurtosis

| type                | skewness   | kurtosis |
|---------------------|------------|----------|
| original            | -0.5686429 | 3.061584 |
| log transformation  | -1.1154819 | 4.549626 |
| sqrt transformation | -0.8234084 | 3.627880 |

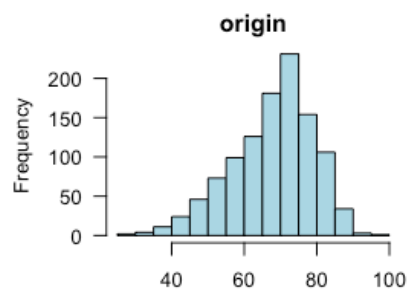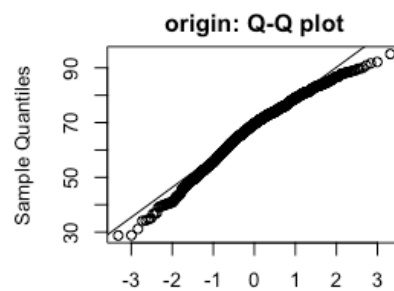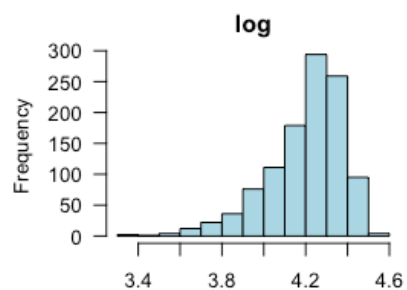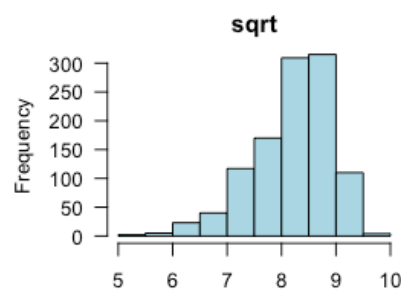

#### [ Age at symptom onset ]

normality test : Shapiro-Wilk normality test

statistic : 0.97588, p-value : 1.5656E-12

skewness and kurtosis

| type                | skewness   | kurtosis |
|---------------------|------------|----------|
| original            | -0.5716038 | 3.023867 |
| log transformation  | -1.1247779 | 4.547863 |
| sqrt transformation | -0.8283748 | 3.599474 |

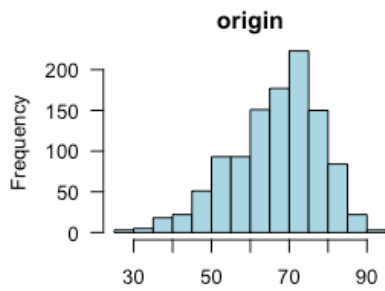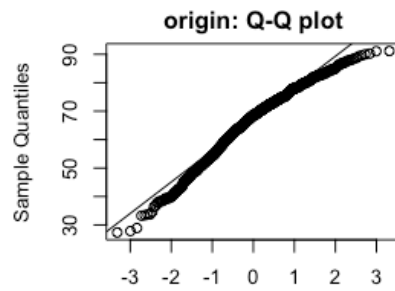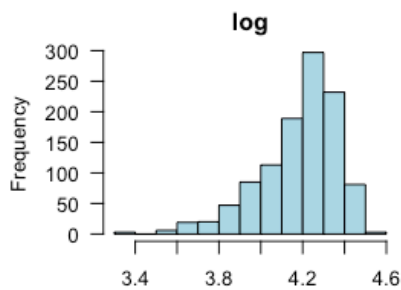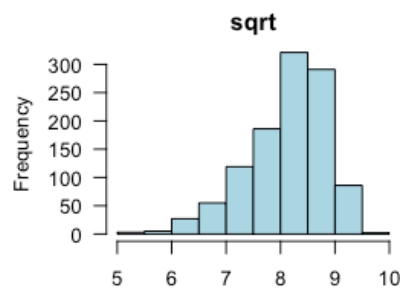

[ ALSFRS1 ]

normality test : Shapiro-Wilk normality test

statistic : 0.77009, p-value : 3.96979E-35

skewness and kurtosis

| type                | skewness  | kurtosis |
|---------------------|-----------|----------|
| original            | -1.324877 | 4.284758 |
| log transformation  | NaN       | NaN      |
| sqrt transformation | -2.558313 | 9.954455 |



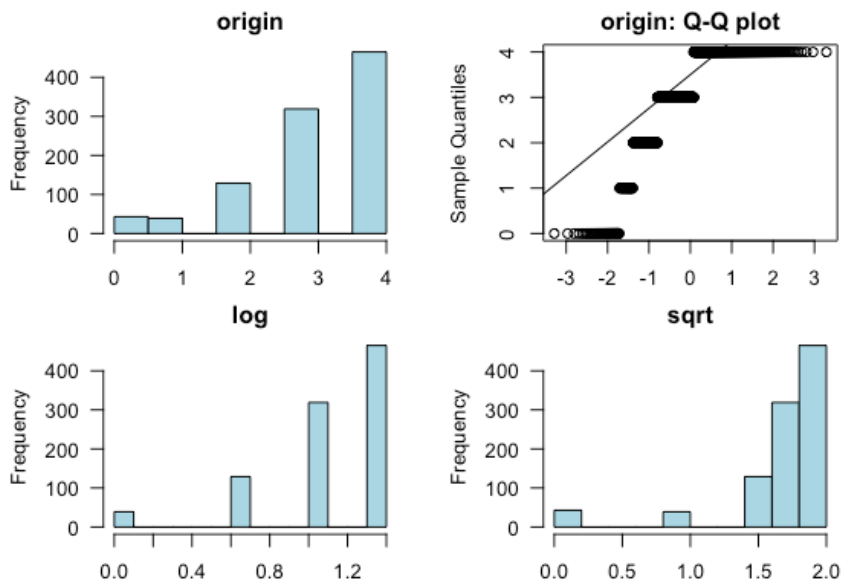

[ ALSFRS2 ]

normality test : Shapiro-Wilk normality test

statistic : 0.61226, p-value : 1.87682E-42

skewness and kurtosis

| type                | skewness  | kurtosis  |
|---------------------|-----------|-----------|
| original            | -1.971849 | 6.629249  |
| log transformation  | NaN       | NaN       |
| sqrt transformation | -3.368184 | 17.948477 |

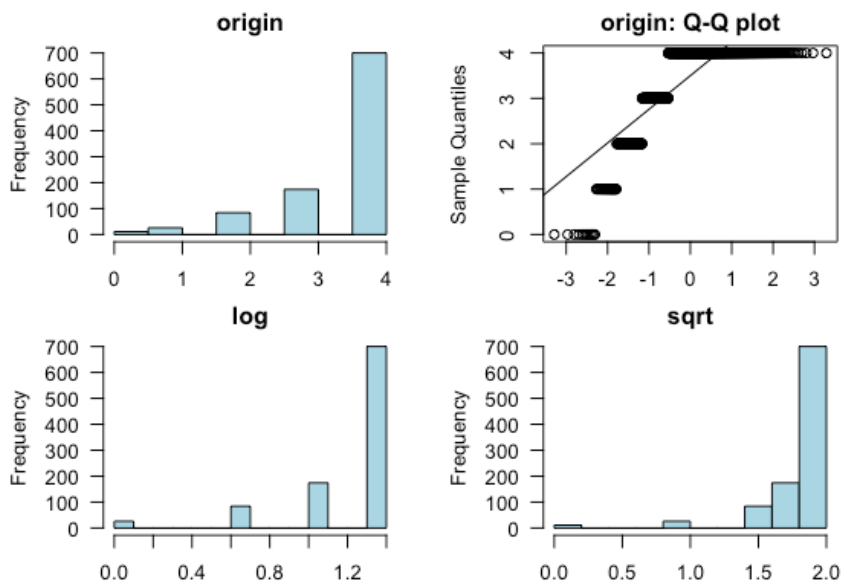

[ ALSFRS3 ]

normality test : Shapiro-Wilk normality test

statistic : 0.75951, p-value : 9.92163E-36

skewness and kurtosis

| type                | skewness  | kurtosis  |
|---------------------|-----------|-----------|
| original            | -1.218091 | 3.930507  |
| log transformation  | NaN       | NaN       |
| sqrt transformation | -2.573329 | 10.892644 |

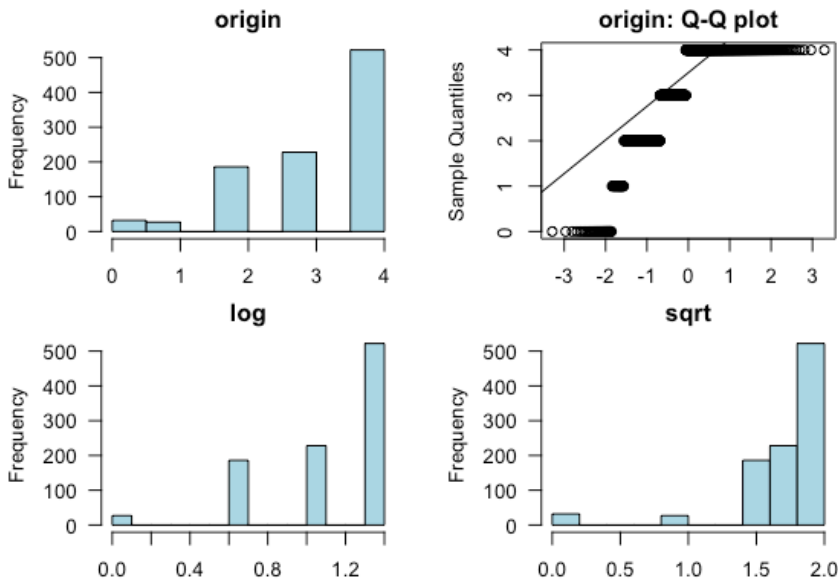

[ ALSFRS4 ]

normality test : Shapiro-Wilk normality test

statistic : 0.74568, p-value : 1.74049E-36

skewness and kurtosis

| type               | skewness  | kurtosis |
|--------------------|-----------|----------|
| original           | -1.442748 | 4.655703 |
| log transformation | NaN       | NaN      |

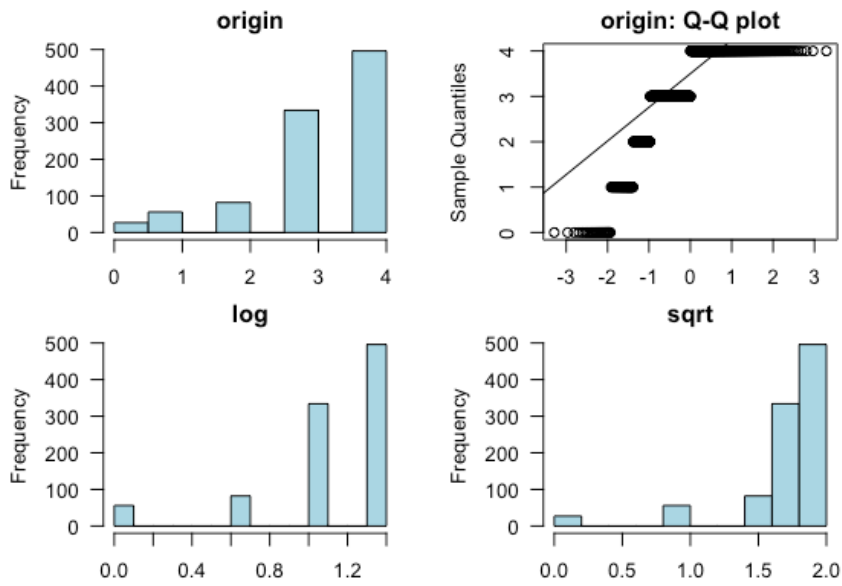

[ ALSFRS5 ]

normality test : Shapiro-Wilk normality test

statistic : 0.82422, p-value : 5.0552E-33

skewness and kurtosis

| type                | skewness   | kurtosis |
|---------------------|------------|----------|
| original            | -0.7556191 | 2.293288 |
| log transformation  | NaN        | NaN      |
| sqrt transformation | -1.4192800 | 3.692880 |

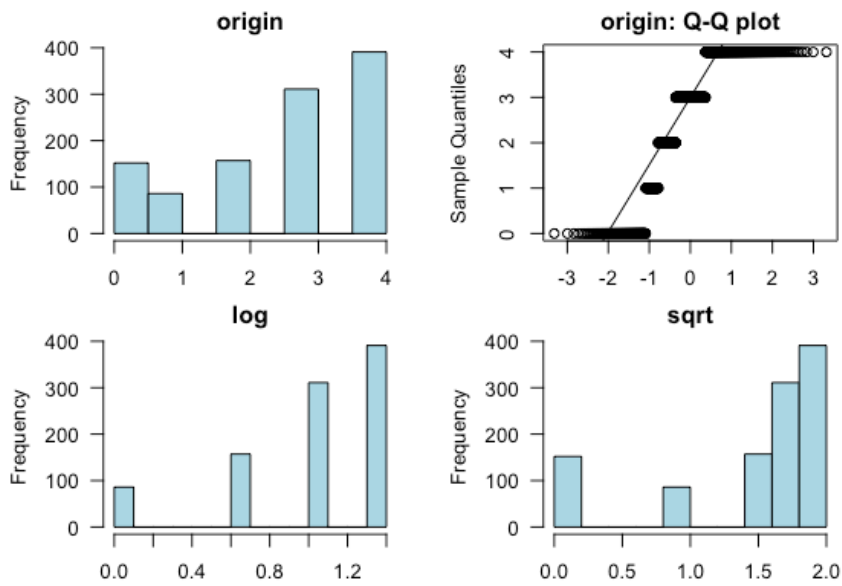

### [ ALSFRS6 ]

normality test : Shapiro-Wilk normality test

statistic : 0.85748, p-value : 4.64907E-29

skewness and kurtosis

| type                | skewness   | kurtosis |
|---------------------|------------|----------|
| original            | -0.7167829 | 2.560603 |
| log transformation  | NaN        | NaN      |
| sqrt transformation | -1.7488419 | 5.871652 |

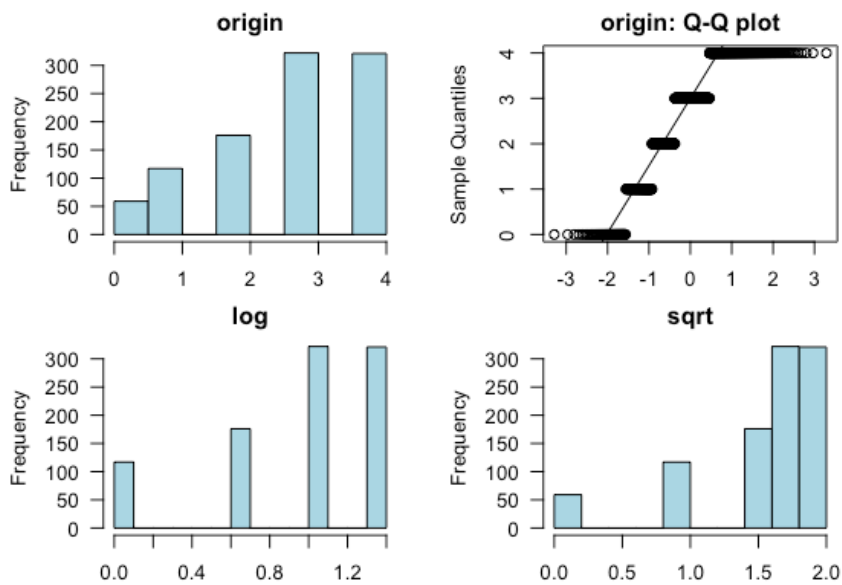

[ ALSFRS7 ]

normality test : Shapiro-Wilk normality test

statistic : 0.71773, p-value : 6.44697E-38

skewness and kurtosis

| type                | skewness  | kurtosis  |
|---------------------|-----------|-----------|
| original            | -1.479893 | 4.460061  |
| log transformation  | NaN       | NaN       |
| sqrt transformation | -2.601253 | 10.114175 |

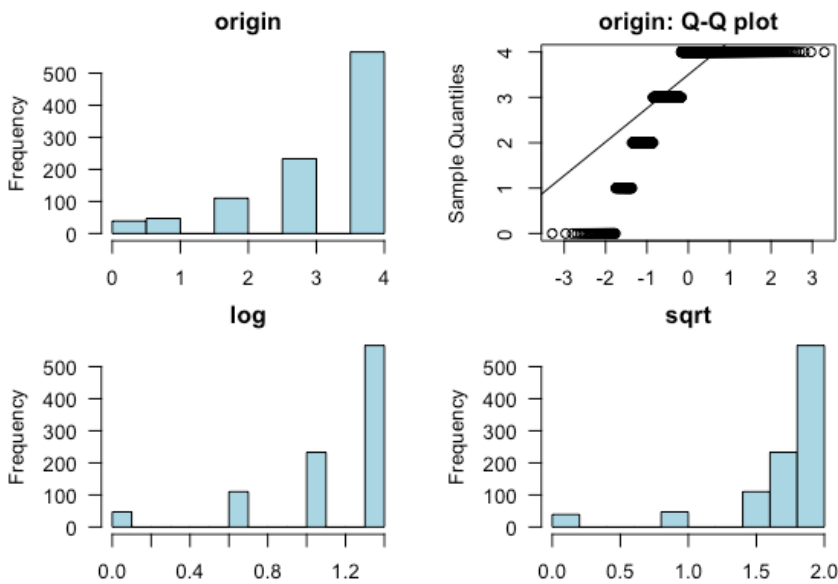

[ ALSFRS8 ]

normality test : Shapiro-Wilk normality test

statistic : 0.85307, p-value : 1.99148E-29

skewness and kurtosis

| type               | skewness   | kurtosis |
|--------------------|------------|----------|
| original           | -0.6548167 | 2.851189 |
| log transformation | NaN        | NaN      |

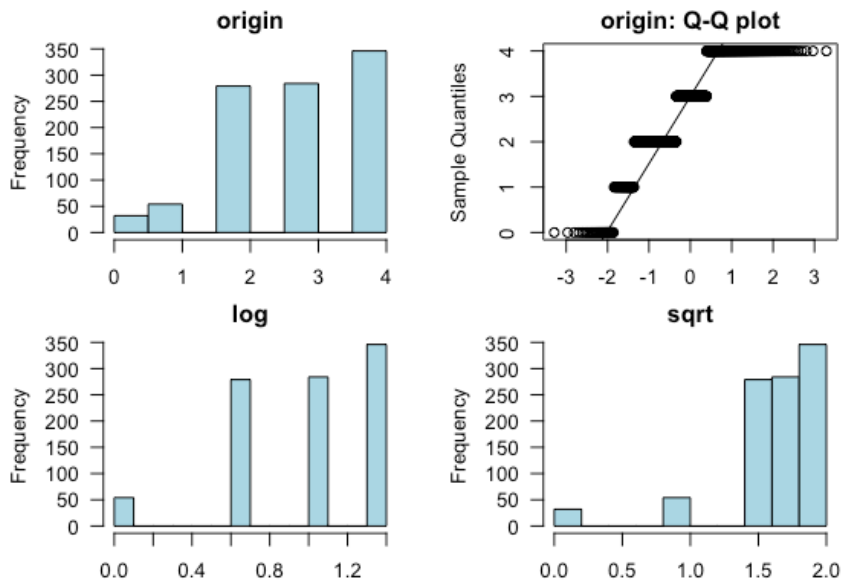

[ ALSFRS9 ]

normality test : Shapiro-Wilk normality test

statistic : 0.84671, p-value : 6.05301E-30

skewness and kurtosis

| type                | skewness   | kurtosis |
|---------------------|------------|----------|
| original            | -0.2175102 | 1.532836 |
| log transformation  | NaN        | NaN      |
| sqrt transformation | -0.8821221 | 2.536863 |

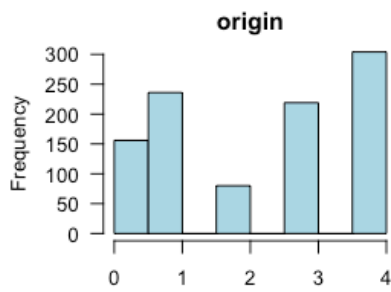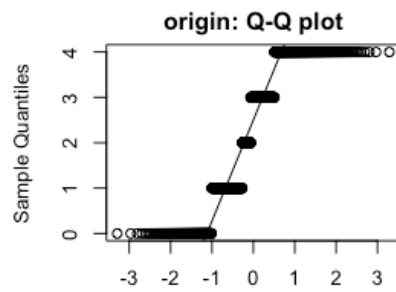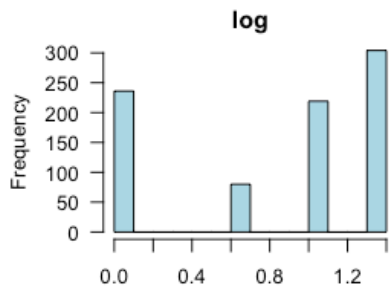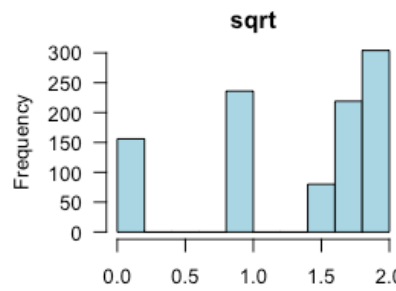

[ ALSFRS10 ]

normality test : Shapiro-Wilk normality test

statistic : 0.54302, p-value : 6.62524E-45

skewness and kurtosis

| type                | skewness  | kurtosis  |
|---------------------|-----------|-----------|
| original            | -2.310440 | 7.713219  |
| log transformation  | NaN       | NaN       |
| sqrt transformation | -3.391445 | 16.214186 |

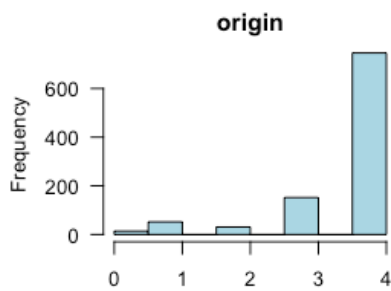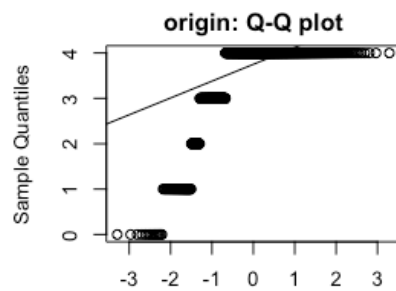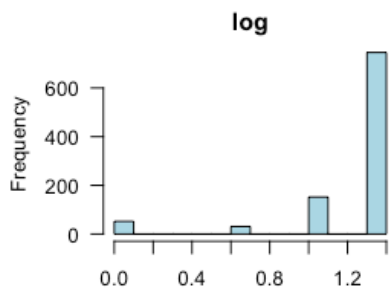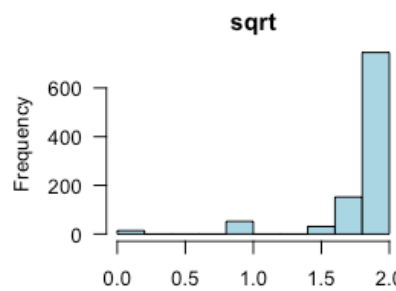

[ ALSFRS11 ]

normality test : Shapiro-Wilk normality test

statistic : 0.45176, p-value : 1.04845E-47

skewness and kurtosis

| type                | skewness  | kurtosis |
|---------------------|-----------|----------|
| original            | -2.979773 | 12.47462 |
| log transformation  | NaN       | NaN      |
| sqrt transformation | -4.721782 | 31.08390 |

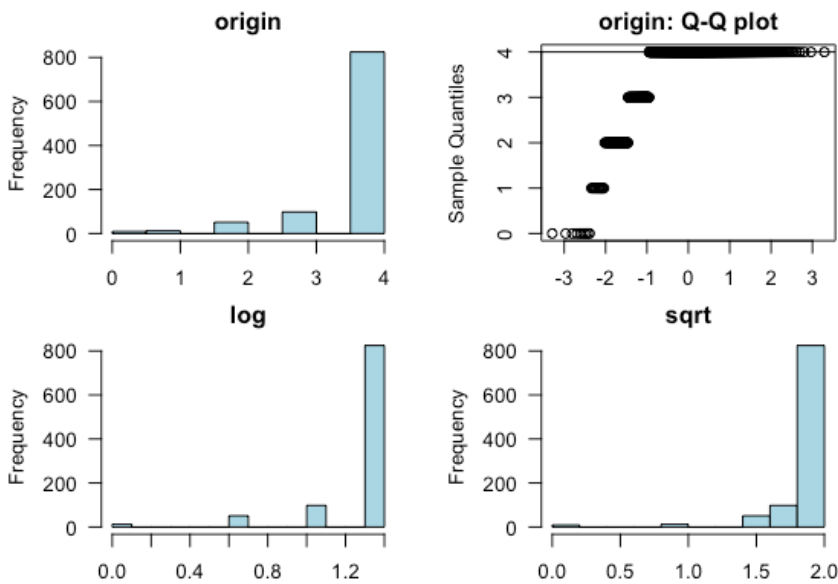

[ ALSFRS12 ]

normality test : Shapiro-Wilk normality test

statistic : 0.26417, p-value : 2.03035E-52

skewness and kurtosis

| type               | skewness  | kurtosis |
|--------------------|-----------|----------|
| original           | -4.708571 | 26.10269 |
| log transformation | NaN       | NaN      |



sqrt transformation    -6.134356    43.18172

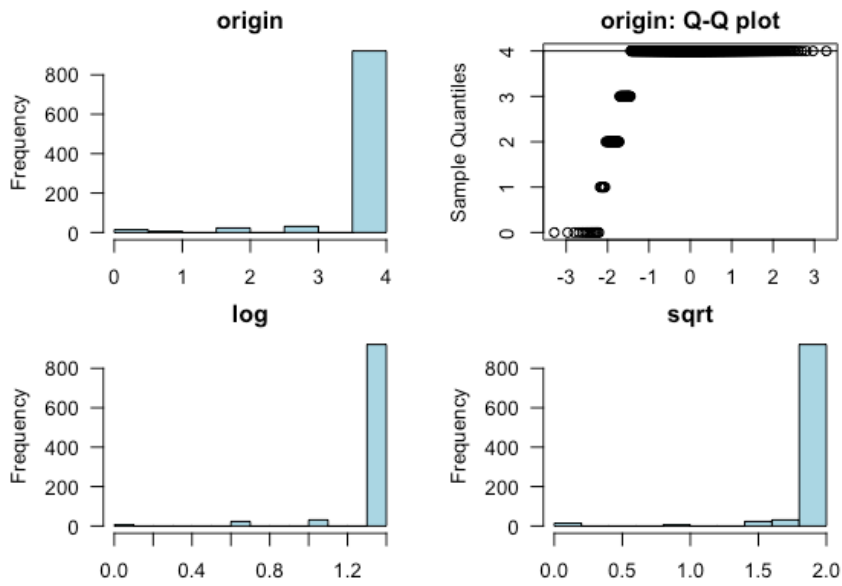

[ First ALSFRS-R total ]

normality test : Shapiro-Wilk normality test

statistic : 0.85717, p-value : 4.38196E-29

skewness and kurtosis

| type                | skewness  | kurtosis  |
|---------------------|-----------|-----------|
| original            | -1.618671 | 6.199971  |
| log transformation  | -4.860760 | 39.513996 |
| sqrt transformation | -2.539912 | 12.644283 |

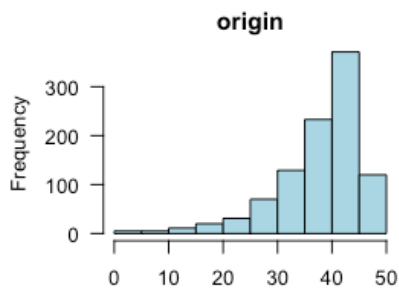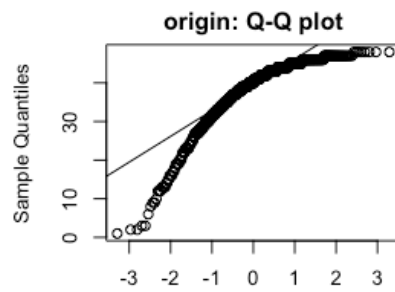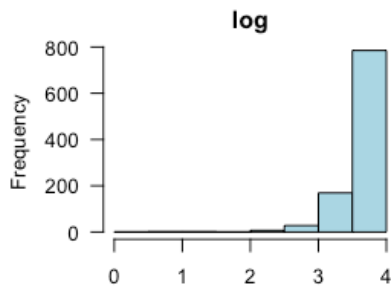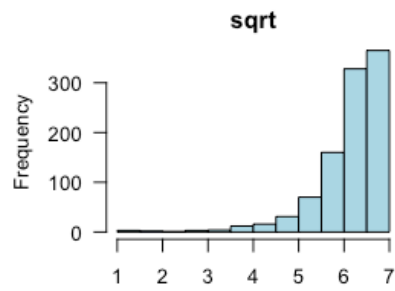

[ BMI 2 years prior to illness ]

normality test : Shapiro-Wilk normality test

statistic : 0.95483, p-value : 2.38269E-15

skewness and kurtosis

| type                | skewness  | kurtosis |
|---------------------|-----------|----------|
| original            | 0.9609847 | 5.468668 |
| log transformation  | 0.2925616 | 3.984020 |
| sqrt transformation | 0.6151608 | 4.520224 |

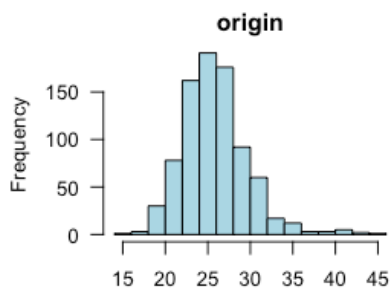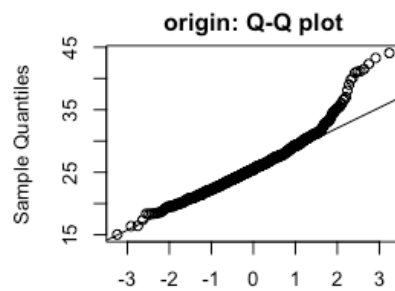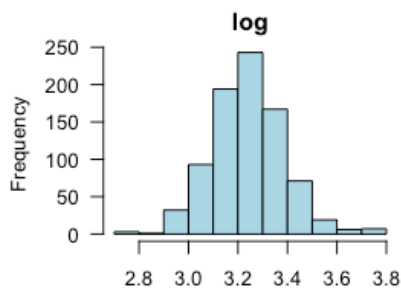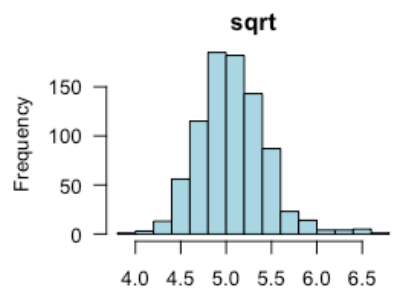

**[ BMI at diagnosis ]**

normality test : Shapiro-Wilk normality test

statistic : 0.97579, p-value : 4.61281E-11

skewness and kurtosis

| type                | skewness   | kurtosis |
|---------------------|------------|----------|
| original            | 0.6269147  | 4.892236 |
| log transformation  | -0.1049349 | 3.899200 |
| sqrt transformation | 0.2503565  | 4.127763 |

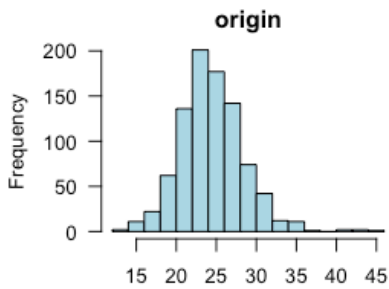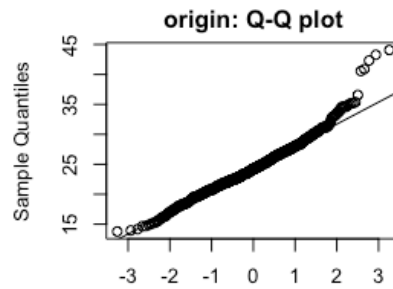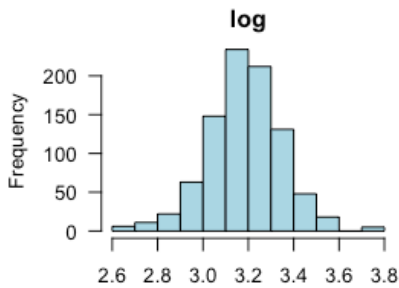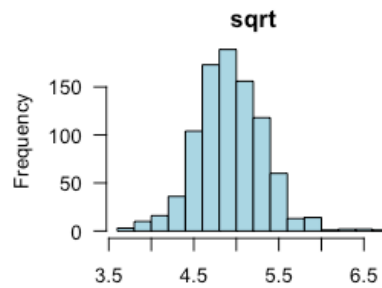

**[ Delay in diagnosis (days) ]**

normality test : Shapiro-Wilk normality test

statistic : 0.67213, p-value : 1.54091E-41

skewness and kurtosis

| type               | skewness | kurtosis  |
|--------------------|----------|-----------|
| original           | 3.455771 | 20.711731 |
| log transformation | NaN      | NaN       |

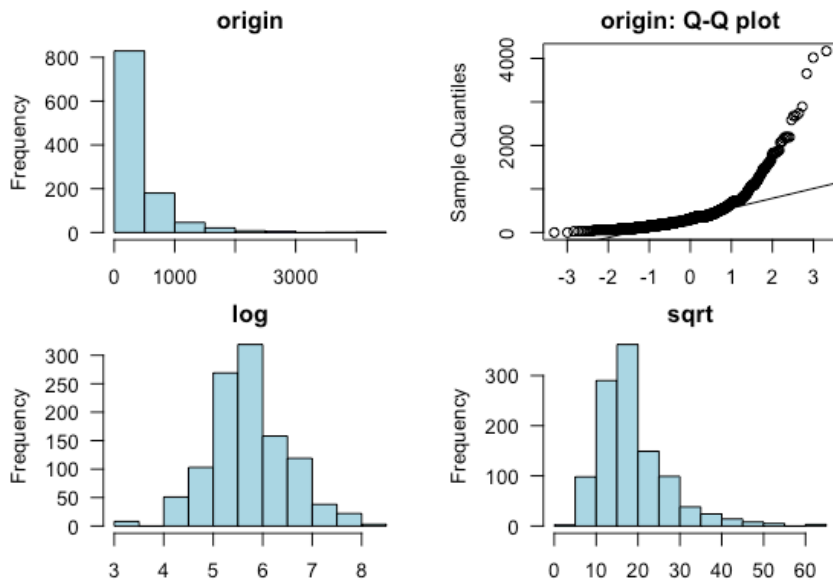

[ FVC percent at diagnosis ]

normality test : Shapiro-Wilk normality test

statistic : 0.98397, p-value : 1.85344E-05

skewness and kurtosis

| type                | skewness   | kurtosis |
|---------------------|------------|----------|
| original            | -0.3649251 | 2.899146 |
| log transformation  | -1.4987068 | 6.072695 |
| sqrt transformation | -0.8540960 | 3.715406 |

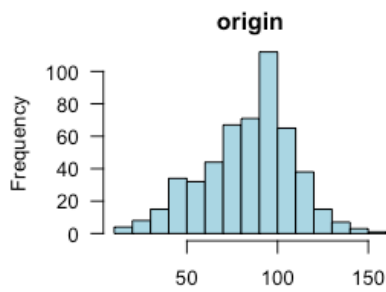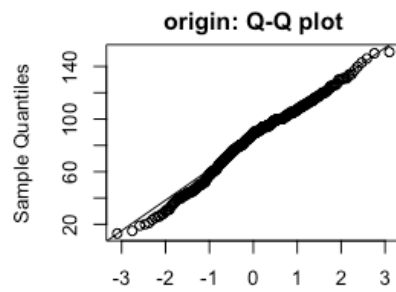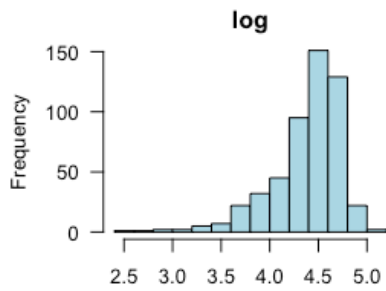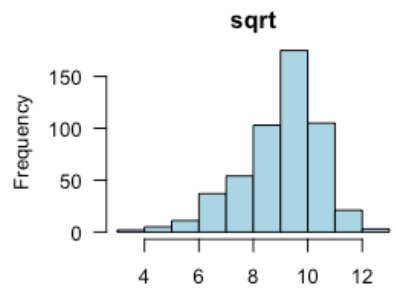

### [ Height ]

normality test : Shapiro-Wilk normality test

statistic : 0.99259, p-value : 0.000127709

skewness and kurtosis

| type                | skewness   | kurtosis |
|---------------------|------------|----------|
| original            | -0.0975817 | 2.933227 |
| log transformation  | -0.2490665 | 2.993306 |
| sqrt transformation | -0.1732104 | 2.954348 |

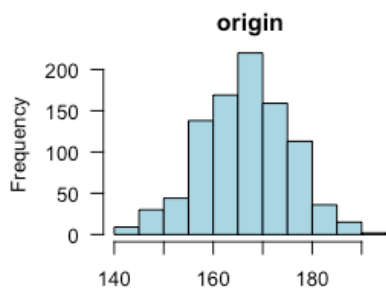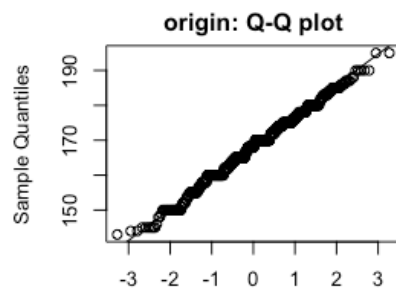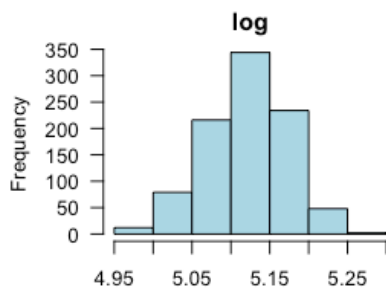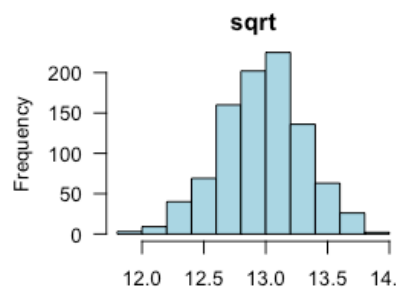

**[ Rate of decline ALSFRS-R (per month) ]**

normality test : Shapiro-Wilk normality test

statistic : 0.45084, p-value : 1.11835E-47

skewness and kurtosis

| type                | skewness  | kurtosis  |
|---------------------|-----------|-----------|
| original            | 10.855001 | 194.98672 |
| log transformation  | NaN       | NaN       |
| sqrt transformation | 2.117055  | 15.95258  |

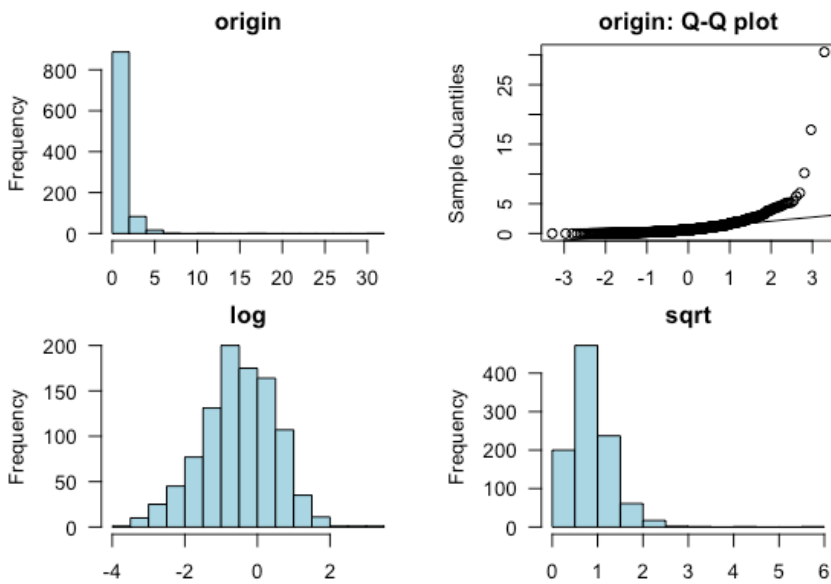

**[ Rate of decline BMI (per month) ]**

normality test : Shapiro-Wilk normality test

statistic : 0.81187, p-value : 6.27561E-30

skewness and kurtosis

| type               | skewness  | kurtosis |
|--------------------|-----------|----------|
| original           | 1.5277608 | 6.574505 |
| log transformation | NaN       | NaN      |

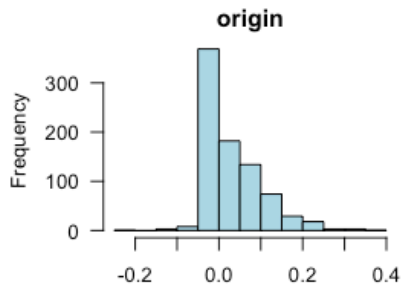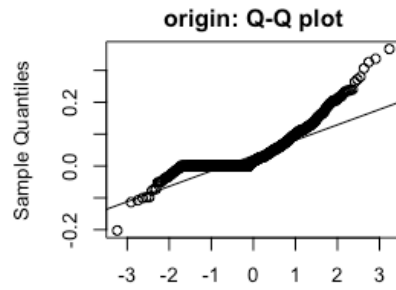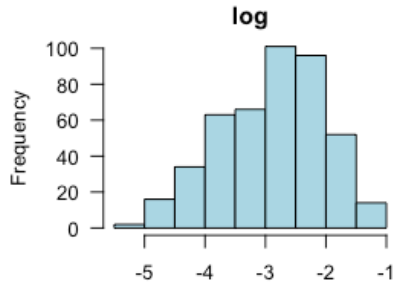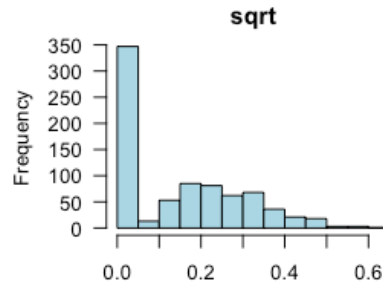

**[ Survival (days) ]**

normality test : Shapiro-Wilk normality test

statistic : 0.87498, p-value : 6.47691E-25

skewness and kurtosis

| type                | skewness   | kurtosis |
|---------------------|------------|----------|
| original            | 1.3023905  | 4.483511 |
| log transformation  | -0.1239991 | 2.335726 |
| sqrt transformation | 0.6027388  | 2.680037 |

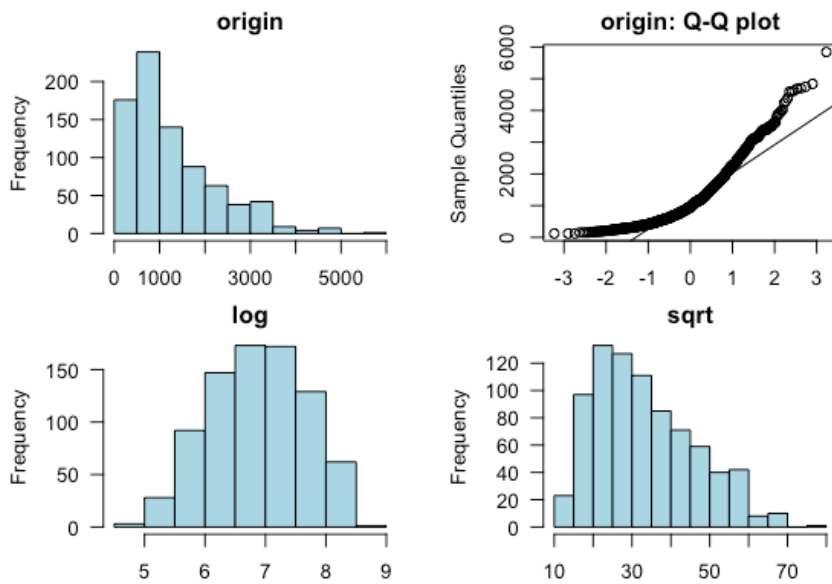

### [ Time of first ALSFRS-R (days into illness) ]

normality test : Shapiro-Wilk normality test

statistic : 0.73542, p-value : 5.58944E-37

skewness and kurtosis

| type                | skewness   | kurtosis  |
|---------------------|------------|-----------|
| original            | 2.8523601  | 15.042545 |
| log transformation  | -0.0975394 | 3.872581  |
| sqrt transformation | 1.3013225  | 5.624284  |

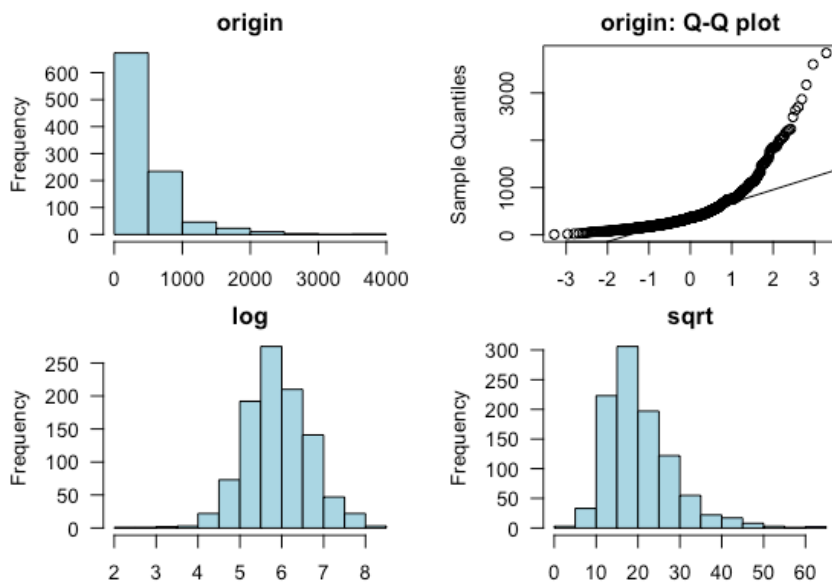



**[ Time of NIPPV (days into illness) ]**

normality test : Shapiro-Wilk normality test

statistic : 0.8642, p-value : 4.51671E-14

skewness and kurtosis

| type                | skewness   | kurtosis |
|---------------------|------------|----------|
| original            | 1.5806302  | 5.807980 |
| log transformation  | -0.3938839 | 3.734917 |
| sqrt transformation | 0.6964814  | 3.525247 |

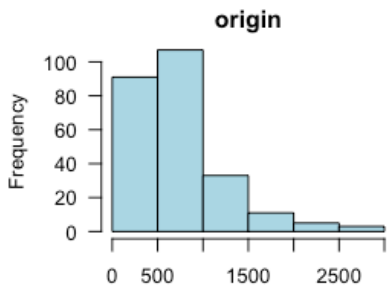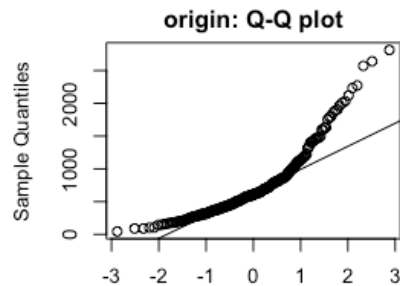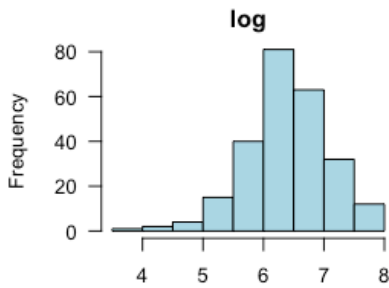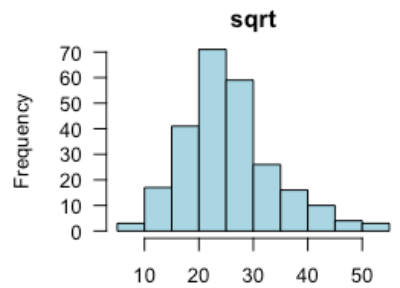

**[ Time of PEG (days into illness) ]**

normality test : Shapiro-Wilk normality test

statistic : 0.87414, p-value : 1.14951E-12

skewness and kurtosis

| type               | skewness   | kurtosis |
|--------------------|------------|----------|
| original           | 1.5716974  | 6.124369 |
| log transformation | -0.3066038 | 4.086179 |

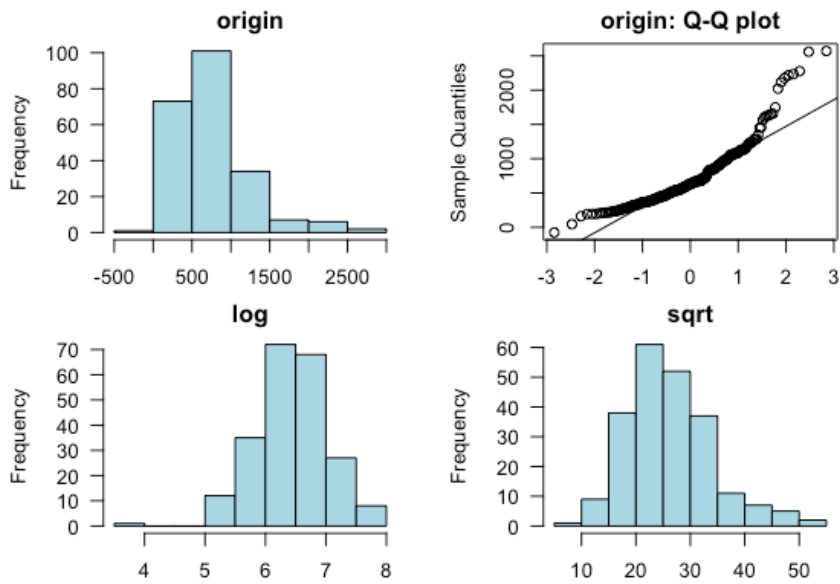

**[ Time of tracheostomy (days into illness) ]**

normality test : Shapiro-Wilk normality test

statistic : 0.88057, p-value : 5.18023E-08

skewness and kurtosis

| type                | skewness   | kurtosis |
|---------------------|------------|----------|
| original            | 1.4169197  | 5.313599 |
| log transformation  | -0.0258596 | 2.386614 |
| sqrt transformation | 0.6532936  | 3.170014 |

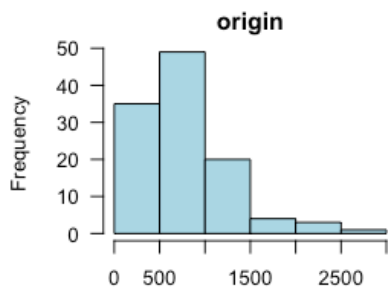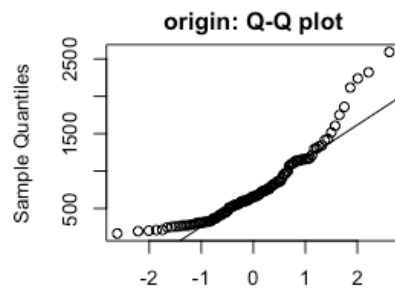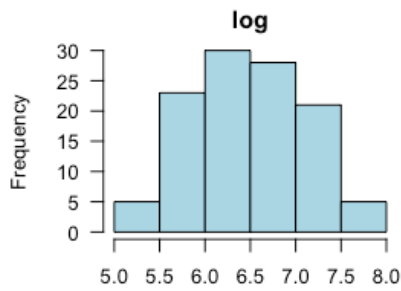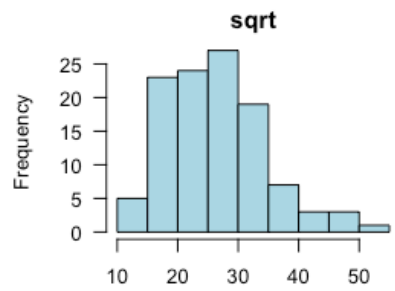

[ Weight 2 years prior to illness ]

normality test : Shapiro-Wilk normality test

statistic : 0.97546, p-value : 9.70346E-11

skewness and kurtosis

| type                | skewness  | kurtosis |
|---------------------|-----------|----------|
| original            | 0.6582430 | 4.267136 |
| log transformation  | 0.0025790 | 3.242574 |
| sqrt transformation | 0.3177279 | 3.551674 |

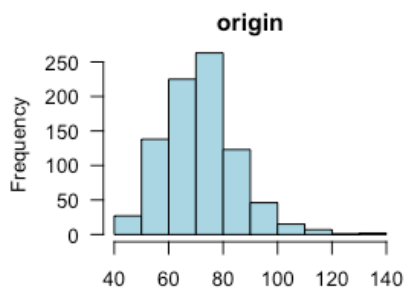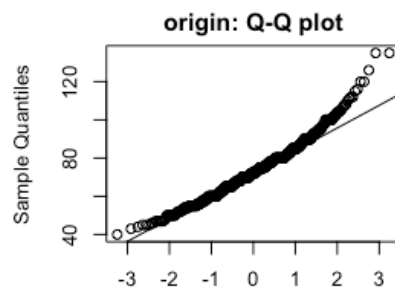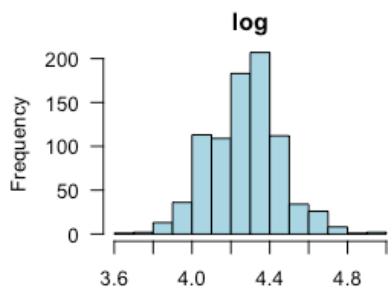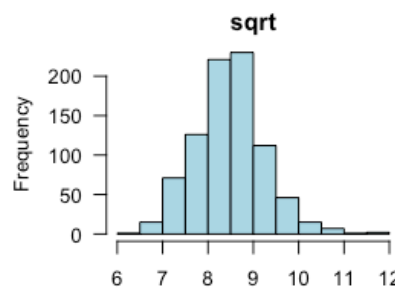

## [ Weight at diagnosis ]

normality test : Shapiro-Wilk normality test

statistic : 0.99126, p-value : 3.16184E-05

skewness and kurtosis

| type                | skewness   | kurtosis |
|---------------------|------------|----------|
| original            | 0.3241353  | 3.734421 |
| log transformation  | -0.4038662 | 3.679122 |
| sqrt transformation | -0.0377384 | 3.441667 |

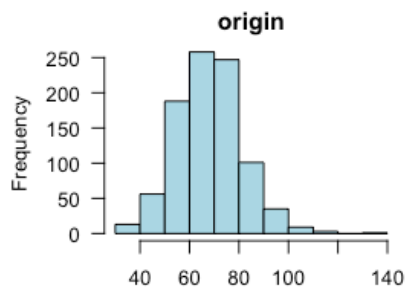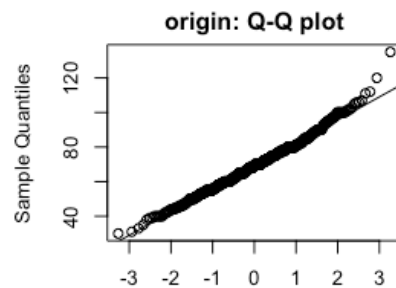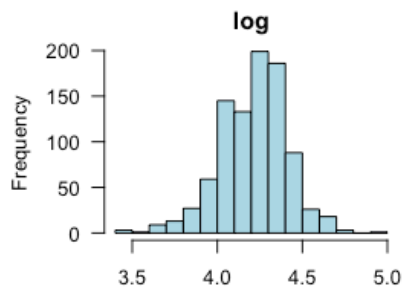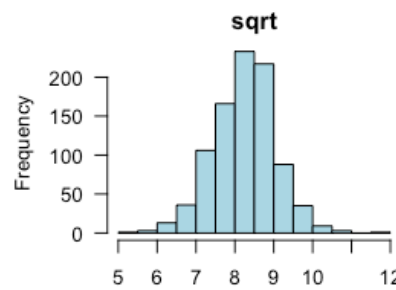

## 3 Relationship Between Variables

### 3.1 Correlation Coefficient

#### 3.1.1 Correlation Coefficient by Variable Combination

Table of correlation coefficients (0.5 or more)

| Variable1                                  | Variable2                 | Correlation Coefficient |
|--------------------------------------------|---------------------------|-------------------------|
| Time of tracheostomy (days into illness)   | Survival (days)           | 1.0000000               |
| Age at symptom onset                       | Age at diagnosis          | 0.9945026               |
| Time of first ALSFRS-R (days into illness) | Delay in diagnosis (days) | 0.9208946               |

|                                          |                                            |           |
|------------------------------------------|--------------------------------------------|-----------|
| Time of PEG (days into illness)          | Time of NIPPV (days into illness)          | 0.9051451 |
| Weight at diagnosis                      | Weight 2 years prior to illness            | 0.8948297 |
| ALSFRS9                                  | ALSFRS8                                    | 0.8640204 |
| Time of tracheostomy (days into illness) | Time of PEG (days into illness)            | 0.8461230 |
| BMI at diagnosis                         | BMI 2 years prior to illness               | 0.8419137 |
| Weight at diagnosis                      | BMI at diagnosis                           | 0.8395588 |
| Time of NIPPV (days into illness)        | Survival (days)                            | 0.8236884 |
| Time of tracheostomy (days into illness) | Time of NIPPV (days into illness)          | 0.8236884 |
| Weight 2 years prior to illness          | BMI 2 years prior to illness               | 0.8168989 |
| First ALSFRS-R total                     | ALSFRS7                                    | 0.8057479 |
| First ALSFRS-R total                     | ALSFRS6                                    | 0.7971927 |
| ALSFRS7                                  | ALSFRS6                                    | 0.7924763 |
| ALSFRS5                                  | ALSFRS4                                    | 0.7899101 |
| ALSFRS12                                 | ALSFRS10                                   | 0.7749520 |
| Time of NIPPV (days into illness)        | Time of first ALSFRS-R (days into illness) | 0.7506319 |
| Time of NIPPV (days into illness)        | Delay in diagnosis (days)                  | 0.7492499 |
| ALSFRS3                                  | ALSFRS1                                    | 0.7436443 |
| ALSFRS6                                  | ALSFRS5                                    | 0.7314105 |
| Weight at diagnosis                      | BMI 2 years prior to illness               | 0.7048297 |
| First ALSFRS-R total                     | ALSFRS8                                    | 0.7008749 |
| First ALSFRS-R total                     | ALSFRS5                                    | 0.6995100 |
| ALSFRS11                                 | ALSFRS10                                   | 0.6981255 |
| Weight 2 years prior to illness          | BMI at diagnosis                           | 0.6916708 |
| First ALSFRS-R total                     | ALSFRS9                                    | 0.6851391 |
| First ALSFRS-R total                     | ALSFRS4                                    | 0.6791736 |
| Time of PEG (days into illness)          | Time of first ALSFRS-R (days into illness) | 0.6779765 |
| ALSFRS8                                  | ALSFRS7                                    | 0.6639665 |
| Time of PEG (days into illness)          | Delay in diagnosis (days)                  | 0.6629565 |
| ALSFRS7                                  | ALSFRS5                                    | 0.6507141 |
| ALSFRS12                                 | ALSFRS11                                   | 0.6451175 |
| ALSFRS2                                  | ALSFRS1                                    | 0.6421880 |
| ALSFRS6                                  | ALSFRS4                                    | 0.6388955 |
| Time of PEG (days into illness)          | Survival (days)                            | 0.6266256 |

|                                            |                                      |            |
|--------------------------------------------|--------------------------------------|------------|
| ALSFRS3                                    | ALSFRS2                              | 0.6257266  |
| ALSFRS7                                    | ALSFRS4                              | 0.6169414  |
| ALSFRS8                                    | ALSFRS6                              | 0.6149098  |
| First ALSFRS-R total                       | ALSFRS11                             | 0.6137519  |
| ALSFRS9                                    | ALSFRS6                              | 0.6136345  |
| ALSFRS9                                    | ALSFRS7                              | 0.6108561  |
| Weight 2 years prior to illness            | Height                               | 0.5931270  |
| First ALSFRS-R total                       | ALSFRS10                             | 0.5921760  |
| First ALSFRS-R total                       | ALSFRS3                              | 0.5911316  |
| Survival (days)                            | Delay in diagnosis (days)            | 0.5748130  |
| Time of first ALSFRS-R (days into illness) | Survival (days)                      | 0.5744507  |
| Weight at diagnosis                        | Height                               | 0.5628746  |
| Time of tracheostomy (days into illness)   | Rate of decline ALSFRS-R (per month) | -0.5310273 |
| First ALSFRS-R total                       | ALSFRS12                             | 0.5236304  |
| First ALSFRS-R total                       | ALSFRS1                              | 0.5006015  |

### 3.1.2 Correlation Plot of Numerical Variables

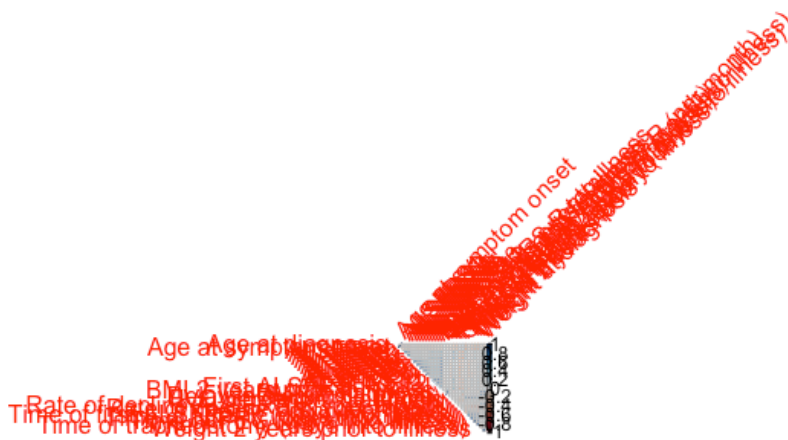

## 4 Target based Analysis

### 4.1 Grouped Descriptive Statistics

#### 4.1.1 Grouped Numerical Variables

#### 4.1.2 Grouped Categorical Variables

## 4.2 Grouped Relationship Between Variables

### 4.2.1 Grouped Correlation Coefficient

### 4.2.2 Grouped Correlation Plot of Numerical Variables
